# Supplementary material for: Cohort profile: PRESTIGIO, an Italian prospective registry-based cohort of people with HIV-1 resistant to reverse transcriptase, protease and integrase inhibitors
Source: PubMed Central journal article supplement — BMJ Open. 2024 Feb 10;14(2):e080606. doi: 10.1136/bmjopen-2023-080606 (PMC10862296; doi:10.1136/bmjopen-2023-080606), 2024-02-10

# BMJ Open

BMJ Open is committed to open peer review. As part of this commitment we make the peer review history of every article we publish publicly available.

When an article is published we post the peer reviewers' comments and the authors' responses online. We also post the versions of the paper that were used during peer review. These are the versions that the peer review comments apply to.

The versions of the paper that follow are the versions that were submitted during the peer review process. They are not the versions of record or the final published versions. They should not be cited or distributed as the published version of this manuscript.

BMJ Open is an open access journal and the full, final, typeset and author-corrected version of record of the manuscript is available on our site with no access controls, subscription charges or pay-per-view fees (<http://bmjopen.bmj.com>).

If you have any questions on BMJ Open's open peer review process please email [info.bmjopen@bmj.com](mailto:info.bmjopen@bmj.com)

# BMJ Open

## Cohort profile: PRESTIGIO, an Italian prospective registry-based cohort of people with HIV-1 resistant to reverse transcriptase, protease, and integrase inhibitors

|                               |                                                                                                                                                                                                                                                                                                                                                                                                                                                                                                                                                                                                                                                                                                                                                                                                                                                                                                                                                                                                                                                                                                                                                                                                                                                                                                                                                                                                                                                                                                                                                                                                                                                                                                                                                                                                                                                                                                                                                                                                  |
|-------------------------------|--------------------------------------------------------------------------------------------------------------------------------------------------------------------------------------------------------------------------------------------------------------------------------------------------------------------------------------------------------------------------------------------------------------------------------------------------------------------------------------------------------------------------------------------------------------------------------------------------------------------------------------------------------------------------------------------------------------------------------------------------------------------------------------------------------------------------------------------------------------------------------------------------------------------------------------------------------------------------------------------------------------------------------------------------------------------------------------------------------------------------------------------------------------------------------------------------------------------------------------------------------------------------------------------------------------------------------------------------------------------------------------------------------------------------------------------------------------------------------------------------------------------------------------------------------------------------------------------------------------------------------------------------------------------------------------------------------------------------------------------------------------------------------------------------------------------------------------------------------------------------------------------------------------------------------------------------------------------------------------------------|
| Journal:                      | <i>BMJ Open</i>                                                                                                                                                                                                                                                                                                                                                                                                                                                                                                                                                                                                                                                                                                                                                                                                                                                                                                                                                                                                                                                                                                                                                                                                                                                                                                                                                                                                                                                                                                                                                                                                                                                                                                                                                                                                                                                                                                                                                                                  |
| Manuscript ID                 | bmjopen-2023-080606                                                                                                                                                                                                                                                                                                                                                                                                                                                                                                                                                                                                                                                                                                                                                                                                                                                                                                                                                                                                                                                                                                                                                                                                                                                                                                                                                                                                                                                                                                                                                                                                                                                                                                                                                                                                                                                                                                                                                                              |
| Article Type:                 | Cohort profile                                                                                                                                                                                                                                                                                                                                                                                                                                                                                                                                                                                                                                                                                                                                                                                                                                                                                                                                                                                                                                                                                                                                                                                                                                                                                                                                                                                                                                                                                                                                                                                                                                                                                                                                                                                                                                                                                                                                                                                   |
| Date Submitted by the Author: | 05-Oct-2023                                                                                                                                                                                                                                                                                                                                                                                                                                                                                                                                                                                                                                                                                                                                                                                                                                                                                                                                                                                                                                                                                                                                                                                                                                                                                                                                                                                                                                                                                                                                                                                                                                                                                                                                                                                                                                                                                                                                                                                      |
| Complete List of Authors:     | <p>Clemente, Tommaso; Vita-Salute San Raffaele University; IRCCS Ospedale San Raffaele, Infectious Diseases<br/> Galli, L; IRCCS Ospedale San Raffaele, Infectious Diseases<br/> Lolatto, Riccardo; IRCCS Ospedale San Raffaele, Infectious Diseases<br/> Gagliardini, Roberta; Lazzaro Spallanzani National Institute for Infectious Diseases<br/> Lagi, Filippo; University Hospital Careggi, Infectious and Tropical Diseases Unit<br/> Ferrara, Micol; University of Turin, Unit of Infectious Diseases, Department of Medical Sciences<br/> Cattelan, Anna Maria ; Padua University Hospital, Infectious Diseases Unit, Department of Molecular Medicine<br/> Focà, Emanuele; ASST Spedali Civili di Brescia, Unit of Infectious and Tropical Diseases, Department of Clinical and Experimental Sciences<br/> Di Biagio, Antonio ; IRCCS Ospedale Policlinico San Martino, Clinic of Infectious Diseases<br/> Cervo, Adriana ; Policlinico di Modena, Infectious Diseases Unit<br/> Calza, Leonardo; Azienda Ospedaliere-Universitaria di Bologna Policlinico S Orsola - Malpighi, Unit of Infectious Diseases, Department of Medical and Surgical Sciences<br/> Maggiolo, Franco; Azienda Ospedaliera Papa Giovanni XXIII, Unit of HIV-related Diseases and Experimental Therapies<br/> Marchetti, Giulia; San Paolo University Hospital, Clinic of Infectious Diseases, Department of Health Sciences<br/> Cenderello, Giovanni; Sanremo Civil Hospital, Department of Infectious Diseases<br/> Rusconi, Stefano; Ospedale Civile di Legnano, Infectious Diseases Unit; Università degli Studi di Milano, DIBIC<br/> Zazzi, Maurizio; University of Siena, Department of Medical Biotechnology<br/> Santoro, Maria-Mercedes ; University of Rome Tor Vergata, Department of Experimental Medicine<br/> Spagnuolo, V; IRCCS Ospedale San Raffaele, Infectious Diseases<br/> Castagna, Antonella; Vita-Salute San Raffaele University; IRCCS Ospedale San Raffaele, Infectious Diseases</p> |
| Keywords:                     | HIV & AIDS < INFECTIOUS DISEASES, Public health < INFECTIOUS DISEASES, REGISTRIES, Sexually Transmitted Disease, VIROLOGY                                                                                                                                                                                                                                                                                                                                                                                                                                                                                                                                                                                                                                                                                                                                                                                                                                                                                                                                                                                                                                                                                                                                                                                                                                                                                                                                                                                                                                                                                                                                                                                                                                                                                                                                                                                                                                                                        |

1  
2  
3  
4  
5  
6  
7  
8  
9  
10  
11  
12  
13  
14  
15  
16  
17  
18  
19  
20  
21  
22  
23  
24  
25  
26  
27  
28  
29  
30  
31  
32  
33  
34  
35  
36  
37  
38  
39  
40  
41  
42  
43  
44  
45  
46  
47  
48  
49  
50  
51  
52  
53  
54  
55  
56  
57  
58  
59  
60

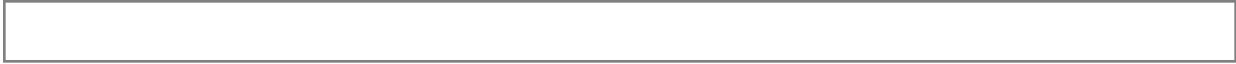

SCHOLARONE™  
Manuscripts

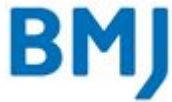

I, the Submitting Author has the right to grant and does grant on behalf of all authors of the Work (as defined in the below author licence), an exclusive licence and/or a non-exclusive licence for contributions from authors who are: i) UK Crown employees; ii) where BMJ has agreed a CC-BY licence shall apply, and/or iii) in accordance with the terms applicable for US Federal Government officers or employees acting as part of their official duties; on a worldwide, perpetual, irrevocable, royalty-free basis to BMJ Publishing Group Ltd ("BMJ") its licensees and where the relevant Journal is co-owned by BMJ to the co-owners of the Journal, to publish the Work in this journal and any other BMJ products and to exploit all rights, as set out in our [licence](#).

The Submitting Author accepts and understands that any supply made under these terms is made by BMJ to the Submitting Author unless you are acting as an employee on behalf of your employer or a postgraduate student of an affiliated institution which is paying any applicable article publishing charge ("APC") for Open Access articles. Where the Submitting Author wishes to make the Work available on an Open Access basis (and intends to pay the relevant APC), the terms of reuse of such Open Access shall be governed by a Creative Commons licence – details of these licences and which [Creative Commons](#) licence will apply to this Work are set out in our licence referred to above.

Other than as permitted in any relevant BMJ Author's Self Archiving Policies, I confirm this Work has not been accepted for publication elsewhere, is not being considered for publication elsewhere and does not duplicate material already published. I confirm all authors consent to publication of this Work and authorise the granting of this licence.

1  
2  
3 **Cohort profile: PRESTIGIO, an Italian prospective registry-based cohort of people with HIV-1**  
4 **resistant to reverse transcriptase, protease, and integrase inhibitors**  
5  
6  
7  
8  
9

10  
11 Tommaso Clemente<sup>1,2</sup>, Laura Galli<sup>2</sup>, Riccardo Lolatto<sup>2</sup>, Roberta Gagliardini<sup>3</sup>, Filippo Lagi<sup>4</sup>, Micol  
12 Ferrara<sup>5</sup>, Anna Maria Cattelan<sup>6</sup>, Emanuele Focà<sup>7</sup>, Antonio Di Biagio<sup>8</sup>, Adriana Cervo<sup>9</sup>, Leonardo  
13 Calza<sup>10</sup>, Franco Maggiolo<sup>11</sup>, Giulia Marchetti<sup>12</sup>, Giovanni Cenderello<sup>13</sup>, Stefano Rusconi<sup>14,15</sup>,  
14 Maurizio Zazzi<sup>16</sup>, Maria Mercedes Santoro<sup>17</sup>, Vincenzo Spagnuolo<sup>2</sup>, Antonella Castagna<sup>1,2</sup> on behalf  
15 of the PRESTIGIO Study Group  
16  
17  
18  
19  
20  
21  
22  
23  
24  
25

26 <sup>1</sup> Vita-Salute San Raffaele University, via Stamira D'Ancona, 20, 20127, Milan, Italy  
27

28  
29 <sup>2</sup> Infectious Diseases, IRCCS San Raffaele Scientific Institute, via Stamira D'Ancona, 20, 20127,  
30 Milan, Italy  
31

32  
33  
34 <sup>3</sup> National Institute for Infectious Diseases "L. Spallanzani" IRCCS, Rome, Italy  
35

36  
37 <sup>4</sup> Infectious and Tropical Diseases Unit, Careggi University Hospital, Florence, Italy  
38

39  
40 <sup>5</sup> Unit of Infectious Diseases, Department of Medical Sciences, University of Turin, Turin, Italy  
41

42  
43 <sup>6</sup> Infectious Diseases Unit, Department of Molecular Medicine, Padua University Hospital, Padua,  
44 Italy  
45

46  
47  
48 <sup>7</sup> Unit of Infectious and Tropical Diseases, Department of Clinical and Experimental Sciences, ASST  
49 Spedali di Brescia, University of Brescia, Brescia, Italy  
50

51  
52  
53 <sup>8</sup> Clinic of Infectious Diseases, IRCCS Policlinico San Martino Hospital, University of Genoa,  
54 Genoa, Italy  
55  
56  
57  
58  
59  
60

1  
2  
3 <sup>9</sup> Infectious Diseases Unit, Policlinico di Modena, Università Degli Studi di Modena e Reggio Emilia,  
4  
5 Modena, Italy  
6  
7

8 <sup>10</sup> Unit of Infectious Diseases, Department of Medical and Surgical Sciences, S. Orsola Hospital,  
9  
10 “Alma Mater Studiorum” University of Bologna, Bologna, Italy  
11  
12

13 <sup>11</sup> Unit of HIV-related Diseases and Experimental Therapies, Azienda Ospedaliera Papa Giovanni  
14  
15 XXIII, Bergamo, Italy  
16  
17

18 <sup>12</sup> Clinic of Infectious Diseases, San Paolo Hospital, ASST Santi Paolo e Carlo, Department of Health  
19  
20 Sciences, University of Milan, Italy  
21  
22

23 <sup>13</sup> Department of Infectious Diseases, Sanremo Hospital, Sanremo, Italy  
24  
25

26 <sup>14</sup> Infectious Diseases Unit, ASST Ovest Milanese, Legnano General Hospital, Legnano, Italy  
27  
28

29 <sup>15</sup> DIBIC, University of Milan, Milan, Italy  
30  
31

32 <sup>16</sup> Department of Medical Biotechnology, University of Siena, Siena, Italy  
33  
34

35 <sup>17</sup> Department of Experimental Medicine, University of Rome “Tor Vergata”, Rome, Italy  
36  
37  
38  
39  
40

41 **Corresponding author’s contact information:**  
42

43 Tommaso Clemente, MD  
44

45 Vita-Salute San Raffaele University  
46

47 Infectious diseases, IRCCS San Raffaele Scientific Institute  
48

49 Via Stamira D’Ancona, 20, 20127, Milan, Italy  
50

51 Email: [clemente.tommaso@hsr.it](mailto:clemente.tommaso@hsr.it)  
52

53 Phone: +39 0226437907  
54

55 Fax: +39 0226437903  
56  
57  
58  
59  
60

## Abstract

**Purpose:** The PRESTIGIO Registry was established in 2017 to collect clinical, virological and immunological monitoring data from people living with 4-class drug resistant HIV (4DR-PLWH). Key research purposes include the evaluation of residual susceptibility to specific antiretrovirals and validation of treatment and monitoring strategies in this population.

**Participants:** The PRESTIGIO Registry collects annual plasma and peripheral blood mononuclear cell samples and demographic, clinical, virological, treatment and laboratory data from PLWH followed at 39 Italian clinical centers and characterized by intermediate-to-high genotypic resistance to  $\geq 1$  nucleoside reverse transcriptase inhibitors (NRTIs),  $\geq 1$  non-nucleoside reverse transcriptase inhibitors (NNRTIs),  $\geq 1$  protease inhibitors (PIs), plus either intermediate-to-high genotypic resistance to  $\geq 1$  integrase strand transfer inhibitors (INSTIs) or history of virological failure to an INSTI-containing regimen. To date, 229 people have been recorded in the cohort. The most of data are collected from the date of first evidence of 4-class drug resistance (baseline) with some pre-baseline information obtained retrospectively, samples are collected from the date of enrollment in the registry.

**Findings to date:** The cohort has been used to assess i) prognosis in terms of survival or development of AIDS or non-AIDS-related clinical events; ii) long-term efficacy and safety of different antiretroviral regimens; iii) virological and immunological factors predictive of clinical outcome and treatment efficacy, especially through analysis of plasma and cell samples.

**Future plans:** The registry can provide new knowledge on how to implement an integrated approach to study PLWH with documented resistance to the 4 main antiretroviral classes, a population with a limited number of individuals characterized by a high degree of frailty and complexity in therapeutic management. Such knowledge would benefit both the individual PLWH and society.

**Registration:** The PRESTIGIO Registry is registered on ClinicalTrials.gov (NCT04098315).

### Strengths and limitations of this study

- The first cohort specifically including people living with 4-class drug-resistant HIV (4DR-PLWH).
- The cohort is readily available for research projects: the data sources (clinical centers) have already been linked and data have been collected in order to enable easier and simpler querying across source systems.
- Annual collection of cryopreserved plasma and peripheral blood mononuclear cell samples for research purposes.
- Given the rare condition of HIV 4-class drug resistance, the cohort includes a limited number of individuals despite the multicenter design.
- Incomplete information before evidence of 4-class drug resistance.



## Introduction

Continuous progress in antiretroviral therapy (ART) has resulted in a high rate of virological suppression and a consequent improvement in life expectancy for individuals with human immunodeficiency virus (HIV).<sup>1-5</sup> Nevertheless, heavily treatment-experienced (HTE) people living with HIV (PLWH) have a history of previous virological failures on different antiretroviral regimens and limited treatment options, because of multidrug resistance and/or drug intolerance.<sup>6,7</sup> ART options can also be limited by drug–drug interactions or drug toxicity, due to the need of both prophylaxis or treatment for opportunistic infections and concomitant therapies for multiple comorbidities, that are common in HTE PLWH,<sup>8,9</sup> especially with aging.<sup>10</sup> This fragile group often needs complex, unusual and asymmetrical regimens (mixture of *quaque die* and *bis in die* schedules or oral, subcutaneous and intravenous administrations) with a high pill burden, possibly leading to a suboptimal adherence, which in turn increases the risk of virological failure with emergent resistance and worsens the prognosis.<sup>11,12</sup>

Even though there is no consensus in defining HTE individuals, these PLWH generally have two or less antiretroviral classes available for use, with limited fully active antiretroviral drugs within each class,<sup>13</sup> and represent a group at increased risk of low adherence and clinical progression. Therefore, establishing cohorts aimed to characterize this population better appears essential.

Among these difficult-to-treat individuals, those who harbor a 4-class drug-resistant (4DR) virus, characterized by resistance to nucleoside reverse transcriptase inhibitors (NRTIs), non-nucleoside reverse transcriptase inhibitors (NNRTIs), protease inhibitors (PIs) and integrase strand transfer inhibitors (INSTIs), represent a particular group with a very high burden of disease and very limited therapeutic options.<sup>14</sup> In terms of epidemiology, the prevalence of HIV 4-class drug resistance on a global scale is unknown: a prospective study in North Carolina estimated this prevalence at approximately 1% of PLWH, with a slight increase since 2007.<sup>15</sup> Recent Italian studies quantified subjects with 4DR HIV at about 2% of treatment-experienced PLWH in 2011-2018.<sup>16</sup> According to the most recent WHO report on HIV drug resistance (2014-2020), virological suppression (defined

1  
2  
3 as HIV RNA <1000 copies/mL) was  $\geq 90\%$  among adults on ART for  $\geq 48$  months in only 6/14  
4  
5 middle- and low-income countries with available data; in virologically non-suppressed PLWH on a  
6  
7 NNRTI-based regimen for  $\geq 48$  months, high-level resistance to efavirenz or nevirapine was  
8  
9 estimated to range from 50 to 95%, resistance to tenofovir from 5 to 56%.<sup>17</sup> However, among  
10  
11 individuals failing a dolutegravir-based regimen, NRTI resistance was reported in 2-91% (data  
12  
13 available from 4 countries only) and INSTI resistance in 0 cases (data available from Zambia  
14  
15 only).<sup>17</sup> Cases of 3-class drug resistance (NRTIs, NNRTIs, and PIs) have been described in Sub-  
16  
17 Saharan Africa, with a high prevalence ( $>20\%$ ) in the setting of virological failure to a second-line  
18  
19 PI-containing regimen.<sup>18-20</sup> Furthermore, resistance to INSTIs has been documented in a high  
20  
21 percentage of individuals failing INSTI-containing regimens,<sup>21</sup> suggesting that 4-class drug  
22  
23 resistance might be increasing in low-income countries.  
24  
25  
26  
27

28 The PRESTIGIO Registry is an Italian open multicenter cohort comprising routinely collected data  
29  
30 and samples in 4DR-PLWH; the cohort is a valuable tool for studying individual characteristics,  
31  
32 including clinical, virological and molecular patterns associated with disease progression. Although  
33  
34 4-class drug resistance might be considered a rare condition in PLWH from high-income countries,  
35  
36 further studies are needed to assess the temporal evolution of this phenomenon, improve the  
37  
38 management of 4DR individuals with a multidisciplinary approach, and evaluate the efficacy of the  
39  
40 newest ART options. Furthermore, results from the PRESTIGIO Registry could be particularly  
41  
42 beneficial for middle- and low-income countries, especially with the widespread use of INSTI-based  
43  
44 regimens, both in the first-line setting and in more advanced lines of therapy. Therefore, this paper  
45  
46 describes the new opportunities in healthcare research emerging from the PRESTIGIO cohort.  
47  
48  
49  
50  
51  
52

### 53 **Cohort description**

### 54 **Study design**

55  
56 The PRESTIGIO Registry is an ongoing Italian, observational, prospective, multicenter cohort  
57  
58 collecting biological samples and data on clinical, laboratory, treatment, and virological  
59  
60

1  
2  
3 characteristics of 4DR-PLWH. At first evidence of 4-class drug-resistance (baseline), individuals are  
4 informed about the Registry, after which they can either sign a specific written informed consent or  
5  
6 informed about the Registry, after which they can either sign a specific written informed consent or  
7  
8 opt out. Follow-up accrues from baseline until death, loss to follow-up, or patient's withdrawal of the  
9  
10 consent.

11  
12 Plasma and peripheral blood mononuclear cell samples are collected annually for each person,  
13  
14 starting from the date of enrollment, cryopreserved and stored in a biobank (BioRep, [www.biorep.it](http://www.biorep.it)).  
15  
16 Clinical, laboratory, treatment, and virological data are annually collected since the date of 4-class  
17  
18 drug resistance evidence; some data before the baseline are backlogged retrospectively (figure 1). An  
19  
20 online electronic case report form (eCRF) is available and dedicated health staff (within each center)  
21  
22 manually inputs the requested information.  
23  
24

### 25 26 **Study setting**

27  
28 The PRESTIGIO Registry was established in December 2017; currently, there are 39 participating  
29  
30 Infectious Diseases Clinics, located throughout Italy [23 in Northern, 8 in Central, 4 in Southern Italy,  
31  
32 and 4 in Sicily and Sardinia (figure 2)].  
33  
34

### 35 36 **Study population**

37  
38 The PRESTIGIO cohort includes PLWH who are (1) 18 years or older; (2) harboring a 4DR strain.  
39  
40 Four-class drug resistance is defined as intermediate or high-level resistance to at least 1 NRTI, at  
41  
42 least 1 NNRTI, at least 1 PI, and at least 1 INSTI, according to the Stanford algorithm (version 9.4.1,  
43  
44 [hivdb.stanford.edu](http://hivdb.stanford.edu)) and considering cumulative data from all the RNA-based genotypic resistance  
45  
46 tests performed for each person. In case of unavailability of any integrase genotype, a documented  
47  
48 virological failure (2 consecutive HIV-1 RNA detections  $\geq 50$  copies/mL, or 1 detection  $\geq 1000$   
49  
50 copies/mL) to an INSTI-containing regimen is accepted as an inclusion criterion.  
51  
52

53  
54 To date (14<sup>th</sup> March 2023), 229 PLWH have been included, of whom 189 (82.5%) are currently in  
55  
56 active care, 30 (13.1%) have died and 10 (4.4%) have been lost to follow-up (table 1; table 2; figure  
57  
58 3). At the last available visit, the median age was 58.3 years, 27.5% were women at birth, 91.7%  
59  
60 Italian, with HIV-1 infection for a median of 29.8 years. About a quarter (24.5%) stated intravenous

1  
2  
3 drug use as mode of transmission, a quarter (24.5%) were men who have sex with men or bisexual  
4 men, and a quarter (23.6%) stated heterosexual mode of transmission. Noteworthy, 9.2% were  
5 mother-to-child transmissions. All were on ART (median ART duration 25.8 years), with a >3-drug  
6 regimen in 41.5% of cases; INSTIs were contained in 85.2% of the current regimens, PIs in 73.4%,  
7 NRTIs in 72.9% and NNRTIs only in 31%. Interestingly, at the last visit, maraviroc was used in 21%  
8 of the regimens, fostemsavir in 7.4%, lenacapavir in 3.9%, ibalizumab in 3.1%, and enfuvirtide in  
9 2.6%. Despite 4-class drug-resistance, 51.5% of individuals reached and maintained a stable  
10 virological suppression (HIV-1 RNA <50 copies/mL for  $\geq 6$  months, without any subsequent failures);  
11 at last available visit, HIV-1 RNA was <50 copies/mL in 70.7% of cases, with a median CD4<sup>+</sup> T-cell  
12 count of 533 cells/ $\mu$ L.  
13  
14

15  
16  
17  
18  
19  
20  
21  
22  
23  
24  
25  
26 As what concerns virological aspects, at the last visit 163/176 (92.6%) PLWH harbor a subtype B  
27 virus, 90/184 (48.9%) a CCR5-tropic strain (table 2); in particular, among these 90 individuals,  
28 tropism different from CCR5 had never been detected in 41.1%. According to cumulative data from  
29 genotypic resistance testing, the most common resistance-associated mutations for each class were  
30 M184V for NRTIs [205/229 (89.5%)], K103N for NNRTIs [121/229 (52.8%)], L90M for PIs [99/229  
31 (43.2%)], and G140S for INSTIs [78/175 (44.6%)], of which 74/78 (94.9%) in combination with  
32 Q148H] (online supplementary figure 1). Among the 54 PLWH with no available integrase genotype,  
33 75.9% were included in the registry after a virological failure to a raltegravir-containing regimen,  
34 10.5% to a dolutegravir-containing regimen, and 0.6% to an elvitegravir/cobicistat-containing  
35 regimen.  
36  
37  
38  
39  
40  
41  
42  
43  
44  
45  
46  
47  
48

### 49 **Study objectives**

50  
51 The primary objectives of the PRESTIGIO Registry include: (1) the clinical characterization of the  
52 population with 4DR HIV at baseline; (2) the quantification of incidence and prevalence of acquired  
53 immunodeficiency syndrome (AIDS)- and non-AIDS-defining clinical events; (3) the evaluation of  
54 long-term efficacy of different ART regimens; (4) the evaluation of ART adherence and related  
55 outcomes; (5) the description of 4DR-PLWH in terms of immunological, virological and  
56  
57  
58  
59  
60

1  
2  
3 inflammatory parameters; (6) the description of genotypic and phenotypic resistance evolution,  
4 especially after new virological failures; (7) the use of new tools to describe the resistance patterns in  
5  
6  
7  
8 4DR-PLWH.  
9

### 10 **Cohort variables and electronic case report form**

11  
12 Variables at baseline include: (1) socio-demographic data (date of birth, sex at birth, country of birth,  
13 ethnicity, employment); (2) lifestyle information (height, weight, smoking habit, alcohol use,  
14 recreational drug use); (3) HIV-related clinical characteristics [mode of HIV transmission, date of  
15 last negative HIV test, date of first positive HIV test, date of ART start, date of highly active ART  
16 start (defined as a combination of drugs from at least 2 classes), date of 4-class drug resistance, all  
17 the available RNA- and DNA-based genotypic resistance tests (including viral tropism and/or subtype  
18 characterization), CD4<sup>+</sup> lymphocyte nadir with date, HIV-1 RNA before ART start, HIV-1 RNA,  
19 CD4<sup>+</sup> and CD8<sup>+</sup> T-cell count]; (4) hepatitis B virus and hepatitis C virus co-infections; (5) complete  
20 blood count and blood chemistry examinations (complete blood cell count, plasma levels of glucose,  
21 triglycerides, total/HDL-/LDL-cholesterol, creatinine, transaminases, direct and indirect bilirubin);  
22  
23  
24  
25  
26  
27  
28  
29  
30  
31  
32  
33  
34  
35  
36  
37  
38  
39  
40  
41  
42  
43  
44  
45  
46  
47  
48  
49  
50  
51  
52  
53  
54  
55  
56  
57  
58  
59  
60

(6) ongoing antiretrovirals and concomitant drugs (with starting date, dosages, schedules and routes of administration); (7) AIDS defining conditions and non-AIDS-related clinical events (including malignancies of any type, diabetes, arterial hypertension requiring treatment, major adverse cardiovascular events, chronic liver or kidney diseases, osteoporosis and related fractures, neurocognitive disorders, chronic obstructive pulmonary disease, etc.); (8) sexually transmitted infections (STIs).

Data collected during follow-up include: (1) an update of hepatitis co-infections; (2) further RNA- and DNA-based genotypic resistance tests, HIV-1 RNA, CD4<sup>+</sup> and CD8<sup>+</sup> T-cell count determinations; (3) new complete blood chemistry; (4) modifications in ART or concomitant therapies (including also date and cause of discontinuation for each drug); (5) vaccinations; (6) incident AIDS- and non-AIDS-related clinical events with or without hospitalization; (7) incident STIs (online supplemental table 1).

1  
2  
3 Standard procedures to insert data into an eCRF (trials-ice2.advicepharma.com/PRESTIGIO/) have  
4  
5 been defined and the staff dedicated to record information have been trained with specific data  
6  
7 management training courses.  
8

9  
10 Participant data are entered after creating a unique pseudonym for each participant; the pseudonym  
11  
12 is a progressive eight-digit code [center code (3 digits), dash and individual's code (4 digits)]. All the  
13  
14 collected data are managed anonymously.  
15

16  
17 The eCRF access is regulated by a permission-based security methodology that limits access to study  
18  
19 data based on the user ID. Permissions are carefully maintained to allow only the required level of  
20  
21 access to study data. User IDs are required to change password on a regular basis. All eCRF data and  
22  
23 other critical study data are fully audit trail enabled, so that all changes to the data can be monitored  
24  
25 and/or recovered, and secured via a decentralized daily backup. Every precaution has been taken to  
26  
27 ensure that computer confidentiality is maintained.  
28  
29  
30  
31

### 32 33 **Patient and public involvement**

34  
35 Until November 2022, a representative from the community of PLWH was co-opted to the Steering  
36  
37 Committee, together with representatives from the main (those with at least 10 4DR-PLWH)  
38  
39 participating centers of the PRESTIGIO Registry, and was involved in the approval of all the  
40  
41 proposed studies. The inclusion of a new member of the community in the Steering committee has  
42  
43 been foreseen for the next months.  
44  
45  
46  
47  
48

### 49 **Findings from the past 6 years to present**

50  
51 **Studies on clinical and immunological characteristics of 4DR-PLWH.** Considering the high risk  
52  
53 of death and comorbidities in individuals with three-class drug-resistant HIV,<sup>12,22</sup> Galli *et al.*  
54  
55 performed a retrospective cohort study on 148 4DR-PLWH from the PRESTIGIO Registry followed  
56  
57 for a median follow-up of 47 months, to assess the incidence of clinical events and death in this fragile  
58  
59 population.<sup>14</sup> This investigation showed a high burden of disease in 4DR population, with a markedly  
60

1  
2  
3 increased incidence of AIDS- (2.65/100 person-years-of-follow-up) and non-AIDS-related clinical  
4 events (4.71/100 person-years-of-follow-up) and death for any cause (1.76/100 person-years-of-  
5 follow-up); further studies to better characterize the burden of disease in the PRESTIGIO cohort are  
6 ongoing. For example, we recently used retrospective data from the Registry to evaluate the  
7 occurrence of sexually transmitted infections (STIs) in 178 4DR-PLWH and found a non-negligible  
8 incidence of bacterial infections (1.3/100 person-years-of-follow-up in men, 0 in women), together  
9 with the occurrence of viral infections (first diagnosis of genital Herpes Simplex Virus in 3.8% of  
10 men and 2.2% of women, first diagnosis of Human Papilloma Virus in 8.3% of men and 6.5% of  
11 women).<sup>23</sup> Although all bacterial sexually transmitted infections were diagnosed when HIV-1 RNA  
12 was <200 copies/mL, these findings highlight the need for strict HIV viremia monitoring, accurate  
13 ART adherence and STI prevention counseling in the population with 4DR HIV.  
14  
15  
16  
17  
18  
19  
20  
21  
22  
23  
24  
25  
26  
27

28 In light of the known association of inflammatory biomarkers with morbidity and mortality in the  
29 general population with HIV,<sup>24-31</sup> we performed a cross-sectional study to evaluate inflammation,  
30 immune activation, microbial translocation, and T-cell exhaustion in 4DR-PLWH.<sup>32</sup> Comparing age-,  
31 sex-, and smoking habit-matched 30 viremic 4DR individuals from the PRESTIGIO Registry, 30  
32 non-viremic 4DR-PLWH from the PRESTIGIO Registry, and 20 non-viremic non-4DR subjects  
33 (from the MODAt study)<sup>33</sup>, we found that a higher inflammatory burden was associated with HIV  
34 multidrug resistance, viremia and a previous cancer diagnosis. Furthermore, T cells were more  
35 activated and 'exhausted' in viremic than non-viremic 4DR individuals. These findings stress the  
36 need for further investigations to better characterize immune dysregulation in the 4DR fragile  
37 population and to evaluate new therapeutic approaches with an impact on inflammation, and  
38 potentially morbidity and mortality.  
39  
40  
41  
42  
43  
44  
45  
46  
47  
48  
49  
50  
51  
52

53 **Virological studies on 4DR strains.** Biological samples collected in PRESTIGIO were used to  
54 evaluate the residual susceptibility of 4DR viral strains to some already approved or investigational  
55 antiretroviral drugs. Particularly, Santoro *et al* analyzed 22 samples from 17 4DR-PLWH who  
56 previously failed twice-daily raltegravir-based or twice-daily dolutegravir-based regimens, obtaining  
57  
58  
59  
60

1  
2  
3 genotypic and phenotypic data, which confirmed that bictegravir and dolutegravir retain activity  
4 against most isolates derived from this fragile HTE population.<sup>34</sup> Similarly, Saladini *et al.* evaluated  
5 the phenotypic susceptibility to NNRTIs from 22 viremic 4DR-PLWH from the PRESTIGIO  
6 Registry: doravirine appeared to be a valid option for some 4DR-PLWH and its activity seemed to be  
7 inferred with fair accuracy by the Stanford HIVdb algorithm.<sup>35</sup> As what concerns molecules with new  
8 mechanisms of action, Saladini *et al.* investigated the genotypic and phenotypic susceptibility to  
9 temsavir in a panel of samples collected from 24 4DR individuals (79% previously exposed to  
10 maraviroc or enfuvirtide): temsavir resistance-associated mutations were detected only in three cases  
11 and there was no impact of viral tropism and/or exposure to other entry inhibitors on fostemsavir  
12 susceptibility.<sup>36</sup> Analogously, Rusconi *et al.* analyzed samples from 24 4DR-PLWH, showing that  
13 only 33% harbored a phenotypically R5-tropic virus, but in these cases leronlimab maintained a full  
14 activity despite the presence of extensive drug resistance and heavy treatment experience.<sup>37</sup> In  
15 addition, leronlimab susceptibility did not appear to be significantly altered by previous or current  
16 exposure to maraviroc. Similar studies can be performed for other recently approved or  
17 investigational antiretroviral drugs.

18  
19  
20  
21  
22  
23  
24  
25  
26  
27  
28  
29  
30  
31  
32  
33  
34  
35  
36  
37 Finally, the role of next-generation sequencing (NGS) in genotypic drug resistance testing has been  
38 explored. Armenia *et al.* used NGS to evaluate HIV-DNA and HIV-RNA mutational load of drug  
39 resistance and APOBEC-related mutations in 20 virologically failing individuals enrolled in the  
40 PRESTIGIO Registry.<sup>38</sup> The study concluded that using NGS in HIV-DNA and HIV-RNA together  
41 with measurement of APOBEC editing might help to identify HTE individuals with multidrug  
42 resistance who are more prone to experience virological failure. Furthermore, in a recently published  
43 case of an HTE woman from the PRESTIGIO Registry, RNA-based NGS, performed at virological  
44 failure, was used to exclude the presence of minority resistance-associated mutations and, together  
45 with available prior genotypic resistance tests, clinical history, and adherence issues, to select an  
46 effective antiretroviral regimen with a low pill burden.<sup>39</sup> In light of this evidence, the PRESTIGIO  
47 Study Group is performing further studies on the use of NGS in clinical practice.



1  
2  
3 **Studies on treatment strategies for 4DR-PLWH.** Given the need for optimizing ART in HTE  
4 individuals, Castagna *et al.* used the data from the PRESTIGIO Registry to perform a cohort study  
5 evaluating the virological efficacy of dolutegravir 50 mg *bis in die* in 190 virologically failing PLWH  
6 with previous exposure to first-generation INSTIs.<sup>40</sup> The estimated probability of virological failure  
7 was limited (17%, 33%, and 52% at 12, 36, and 60 months since baseline, respectively), highlighting  
8 a favorable long-term efficacy of dolutegravir 50 mg twice daily associated with an optimized  
9 background regimen in HTE failing subjects, with an INSTI-resistant virus.

10 Retrospective data from the Registry also showed that a small group of 10 4DR-PLWH who  
11 underwent ART simplification with a high genetic barrier 2-drug regimen (containing  
12 darunavir/ritonavir *bis in die* and/or dolutegravir 50 mg *bis in die*), for any reason, was able to  
13 maintain a long-term suppression in 90% of cases.<sup>41</sup> These findings suggest that a high genetic barrier  
14 2-drug regimen might represent an effective option in carefully selected PLWH with four-class drug  
15 resistance who need simplification; larger studies on the possibility of simplifying complex regimen  
16 in this fragile population are ongoing in the PRESTIGIO cohort.

### 37 **Collaborations**

38  
39 Any HIV care provider from a center participating in the PRESTIGIO Registry may propose a project  
40 to the Steering Committee. After approval of the proposal, anonymized data and/or samples from the  
41 Registry will be made available to the study proponent, together with the support of a Statistical and  
42 Monitoring Team.

43  
44 The PRESTIGIO Registry is also available to collaborate with national and international cohorts or  
45 centers with high expertise in specific fields (e.g., virology, immunology, reservoir quantification,  
46 molecular biology, etc.). In particular, given the limited prevalence of HIV 4-class drug resistance in  
47 high-income countries, collaboration with other cohorts of individuals with multidrug-resistant viral  
48 strains may help to characterize this population better and to draw more easily generalizable  
49 conclusions. In addition, for many clinical, immunological and virological studies, a control group of  
50  
51  
52  
53  
54  
55  
56  
57  
58  
59  
60

1  
2  
3 PLWH without 4-class drug resistance but with long HIV infection and ART duration could be useful,  
4  
5 to estimate the effect of multidrug resistance. Finally, in addition to clinical and treatment  
6  
7 characterization, highly specialized studies may be useful not only to better understand the  
8  
9 mechanisms underlying this population's frailty but also to offer innovative and targeted treatment  
10  
11 approaches.  
12  
13

### 14 15 16 17 **Future plans**

18  
19 The PRESTIGIO Registry provides a unique asset to study long-term treatment, comorbidities, and  
20  
21 drug resistance patterns in people with multidrug-resistant HIV in Italy. On one side, 29% of 4DR-  
22  
23 PLWH still have unsuppressed viral load, requiring new antiretroviral treatment options. On the other  
24  
25 hand, non-viremic individuals with complex ART regimens require safe and robust simplification  
26  
27 strategies to minimize toxicity and maximize adherence. Furthermore, attempts are made to conduct  
28  
29 virological studies on drug resistance mechanisms and the possibility of using new tools to predict  
30  
31 treatment success. Finally, with our aging fragile cohort, studies on comorbidities and their  
32  
33 underlying molecular mechanisms become more important, especially to better characterize the  
34  
35 disease burden in this population and assess the role of long-term ART exposure and past or current  
36  
37 uncontrolled viral replication. In this sense, also study of quality-of-life in these fragile individuals  
38  
39 could be useful to their correct management.  
40  
41  
42  
43  
44  
45

### 46 47 **Strengths and limitations**

48  
49 The main strength of the PRESTIGIO Registry is its unicity: to our knowledge, it is the first cohort  
50  
51 that specifically includes 4DR-PLWH. Furthermore, the registry is already available for research  
52  
53 projects: clinical centers enrolling 4DR individuals have been linked, patient pathways have been  
54  
55 identified, and data have been centralized to enable convenient querying. Accuracy, completeness,  
56  
57 and consistency of data from the date of the first evidence of 4-class drug resistance are high,  
58  
59 especially for genotypic resistance tests, virological and immunological information, antiretroviral  
60

1  
2  
3 treatment and clinical events. Also, the availability of cryopreserved PBMC and plasma samples  
4  
5 collected annually allows to conduct virological and immunological studies to better characterize this  
6  
7 population. The multicenter design overcomes the limitations of single center studies on this small  
8  
9 population, even though the number of individuals included in the cohort remains limited, due to the  
10  
11 rarity of HIV 4-class drug resistance in high-income countries. Some variables are sparsely available  
12  
13 in the PRESTGIO Registry, which currently limits their use for research purposes, but efforts to  
14  
15 retrieve this information or obtain it through laboratory analysis (e.g. tropism and subtype) are under  
16  
17 way. Another limitation is the lack of data before the first evidence of 4DR (except for genotypes),  
18  
19 although extra information from a limited number of individuals can be easily added by the enrolling  
20  
21 centers for specific studies.  
22  
23  
24  
25  
26  
27  
28  
29  
30  
31  
32  
33  
34  
35  
36  
37  
38  
39  
40  
41  
42  
43  
44  
45  
46  
47  
48  
49  
50  
51  
52  
53  
54  
55  
56  
57  
58  
59  
60

## Footnotes

**Collaborators: PRESTIGIO Study Group - STEERING COMMITTEE:** Antonella Castagna (Coordinator), Vincenzo Spagnuolo and Laura Galli (Infectious Diseases, IRCCS San Raffaele Scientific Institute, Milan, Italy), Franco Maggiolo (Unit of HIV-related Diseases and Experimental Therapies, Azienda Ospedaliera Papa Giovanni XXIII, Bergamo, Italy), Leonardo Calza (Unit of Infectious Diseases, Department of Medical and Surgical Sciences, S. Orsola Hospital, “Alma Mater Studiorum” University of Bologna, Bologna, Italy), Emanuele Focà (Unit of Infectious and Tropical Diseases, Department of Clinical and Experimental Sciences, ASST Spedali di Brescia, University of Brescia, Brescia, Italy), Filippo Lagi (Infectious and Tropical Diseases Unit, Careggi University Hospital, Florence, Italy), Giovanni Cenderello (Department of Infectious Diseases, Sanremo Hospital, Sanremo, Italy), Antonio Di Biagio (Clinic of Infectious Diseases, IRCCS Policlinico San Martino Hospital, University of Genoa, Genoa, Italy), Giulia Marchetti (Clinic of Infectious Diseases, San Paolo Hospital, ASST Santi Paolo e Carlo, Department of Health Sciences, University of Milan, Italy), Stefano Rusconi (DIBIC, University of Milan, Italy), Adriana Cervo (Infectious Diseases Unit, Policlinico di Modena, Università Degli Studi di Modena e Reggio Emilia, Modena, Italy), Roberta Gagliardini (National Institute for Infectious Diseases “L. Spallanzani” IRCCS, Rome, Italy), Stefano Bonora (Unit of Infectious Diseases, Department of Medical Sciences, University of Turin, Turin, Italy), Anna Maria Cattelan (Infectious Diseases Unit, Department of Molecular Medicine, Padua University Hospital, Padua, Italy), Maurizio Zazzi (Department of Medical Biotechnologies, University of Siena, Siena, Italy), Maria Mercedes Santoro (Department of Experimental Medicine, University of Rome “Tor Vergata”, Rome, Italy). **VIROLOGY TEAM AND BIOLOGICAL BANK:** Maurizio Zazzi (Department of Medical Biotechnologies, University of Siena, Siena, Italy), Maria Mercedes Santoro (Department of Experimental Medicine, University of Rome “Tor Vergata”, Rome, Italy), Andrea Galli (Infectious Diseases, IRCCS San Raffaele Scientific Institute, Milan, Italy), Francesco Saladini (Department of Medical Biotechnologies, University of Siena, Siena, Italy), Daniele Armenia (Saint Camillus International University of Health Sciences, Rome, Italy).

1  
2  
3 **STUDY COORDINATORS:** Elisabetta Carini and Sabrina Bagaglio (Infectious Diseases, IRCCS  
4 San Raffaele Scientific Institute, Milan, Italy). **STATISTICAL AND MONITORING TEAM:**  
5 Laura Galli, Riccardo Lolatto and Sara Diotallevi (Infectious Diseases, IRCCS San Raffaele  
6 Scientific Institute, Milan, Italy). **PARTICIPATING CENTERS:** ANCONA (Gastroenterological  
7 and Transplant Department, S.O.D. Malattie Infettive Emergenti e degli Immunodepressi, University  
8 Hospital "Ospedali Riuniti", Ancona, Italy): Marcello Tavio and Alessandra Mataloni Paggi;  
9  
10 AVIANO (Centro di riferimento oncologico, Aviano, Italy): Ferdinando Martellotta; BAGNO A  
11 RIPOLI (Infectious Diseases Unit, Santa Maria Annunziata Hospital, Bagno a Ripoli, Italy):  
12 Francesca Vichi, Alessio Bellucci, Elisa Mirabelli; BARI (Operative Unit of Infectious Diseases,  
13 Hospital-University Polyclinic of Bari, Bari, Italy): Annalisa Saracino and Flavia Balena;  
14  
15 BERGAMO (Unit of HIV-related Diseases and Experimental Therapies, Azienda Ospedaliera Papa  
16 Giovanni XXIII, Bergamo, Italy): Franco Maggiolo, Laura Comi, Daniela Valenti, and Claudia  
17 Suardi; BOLOGNA (Unit of Infectious Diseases, Department of Medical and Surgical Sciences, S.  
18 Orsola Hospital, "Alma Mater Studiorum" University of Bologna, Bologna, Italy): Leonardo Calza  
19 and Federica Malerba; BRESCIA (Unit of Infectious and Tropical Diseases, Department of Clinical  
20 and Experimental Sciences, ASST Spedali di Brescia, University of Brescia, Brescia, Italy):  
21 Francesco Castelli, Emanuele Focà, Davide Minisci, Francesca Pennati, Anna Celotti, and Francesca  
22 Brognoli; BUSTO ARSTIZIO (Unit of Infectious Diseases, ASST della Valle Olona, Busto Arsizio  
23 Hospital, Busto Arsizio, Italy): Barbara Menzaghi and Maddalena Farinazzo; CAGLIARI  
24 (Immunology Unit, Department of Internal Medicine, University Hospital of Cagliari, Cagliari, Italy):  
25 Francesco Ortu; (Infectious Diseases Unit, SS Trinità Hospital, ASSL Cagliari, Italy): Marco  
26 Campus; CATANIA (Unit of Infectious Diseases, Garibaldi Hospital, Catania, Italy): Bruno  
27 Cacopardo, Benedetto Maurizio Celesia, Michele Salvatore Paternò Raddusa, and Carmen  
28 Giarratana; CATANZARO (Infectious and Tropical Disease Unit, Department of Medical and  
29 Surgical Sciences, "Magna Graecia" University of Catanzaro, Catanzaro, Italy): Carlo Torti, Paolo  
30 Fusco, and Gabriele Bruno; CREMONA (Unità di Malattie Infettive, ASST di Cremona, Cremona,  
31  
32  
33  
34  
35  
36  
37  
38  
39  
40  
41  
42  
43  
44  
45  
46  
47  
48  
49  
50  
51  
52  
53  
54  
55  
56  
57  
58  
59  
60

1  
2  
3 Italy): Angelo Pan, Paola Brambilla, and Chiara Fornabaio; FIRENZE (Infectious and Tropical  
4 Diseases Unit, Careggi University Hospital, Florence, Italy): Alessandro Bartoloni, Paola Corsi,  
5  
6 Seble Tekle Kiros, Filippo Lagi, and Filippo Ducci; FOGGIA (Clinic of Infectious Diseases,  
7  
8 Department of Clinical and Experimental Medicine, University of Foggia, Foggia, Italy): Teresa  
9  
10 Santantonio, Sergio Lo Caputo, Sergio Ferrara, and Marianna Narducci; GENOVA (Infectious  
11  
12 Disease Unit, Galliera Hospital, Genoa, Italy): Emanuele Pontali, Marcello Feasi, and Antonio Sarà;  
13  
14 (Clinic of Infectious Diseases, IRCCS Policlinico San Martino Hospital, University of Genoa, Genoa,  
15  
16 Italy): Matteo Bassetti, Antonio Di Biagio, and Sabrina Bianchi; LA SPEZIA (Infectious Diseases  
17  
18 and Hepatology Unit, Sant'Andrea Hospital La Spezia, La Spezia, Italy): Stefania Artioli and Michele  
19  
20 Guerra; MILANO (Infectious Diseases, IRCCS San Raffaele Scientific Institute, Milan, Italy):  
21  
22 Antonella Castagna, Vincenzo Spagnuolo, Elisabetta Carini, Sabrina Bagaglio, Laura Galli, Riccardo  
23  
24 Lolatto, Andrea Galli, Tommaso Clemente, Rebecka Papaioannu Borjesson, and Sara Diotallevi; (III  
25  
26 Division of Infectious Diseases, ASST Fatebenefratelli Sacco, Luigi Sacco Hospital, Milano, Italy):  
27  
28 Spinello Antinori, Tiziana Formenti, and Andrea Giacomelli; (Clinic of Infectious Diseases, San  
29  
30 Paolo Hospital, ASST Santi Paolo e Carlo, Department of Health Sciences, University of Milan,  
31  
32 Italy): Giulia Marchetti, Lidia Gazzola, and Federica De Flaviis; (Division of Infectious Diseases,  
33  
34 ASST Grande Ospedale Metropolitano Niguarda, Milano, Italy): Massimo Puoti, Cristina Moioli,  
35  
36 and Federico D'Amico; (Infectious Diseases Unit, Department of Internal Medicine, Fondazione  
37  
38 IRCCS Ca' Granda Ospedale Maggiore Policlinico, Milan, Italy): Alessandra Bandera and Valentina  
39  
40 Ferroni; MODENA (Infectious Diseases Unit, Policlinico di Modena, Università Degli Studi di  
41  
42 Modena e Reggio Emilia, Modena, Italy): Cristina Mussini, Adriana Cervo, Roncaglia Enrica,  
43  
44 Nardini Giulia, and Barbara Beghetto; NAPOLI (VIII Infectious Disease Unit, AORN dei Coli, PO  
45  
46 Cotugno, Naples, Italy): Elio Manzillo and Amedeo Lanzardo; PADOVA (Infectious Diseases Unit,  
47  
48 Department of Molecular Medicine, Padua University Hospital, Padua, Italy): Anna Maria Cattelan  
49  
50 and Maria Mazzitelli; PALERMO (Infectious and Tropical Disease Unit, Sicilian Regional Reference  
51  
52 Center for the Fight against AIDS, AOU Policlinico "P. Giaccone", Palermo, Italy): Antonio Cascio  
53  
54  
55  
56  
57  
58  
59  
60

1  
2  
3 and Marcello Trizzino; PARMA (Unit of Infectious Diseases, AO-Universitaria, Parma, Italy): Elisa  
4 Fronti and Diletta Laccabue; PAVIA (Division of Infectious Diseases, Fondazione IRCCS Policlinico  
5 San Matteo, Pavia, Italy): Roberto Gulminetti and Andrea Zuccarini; PERUGIA (Infectious Diseases  
6 Clinic, University Hospital "S. Maria della Misericordia", University of Perugia, Perugia, Italy):  
7 Daniela Francisci, Elisabetta Schiaroli, and Giuseppe De Socio; REGGIO EMILIA (Malattie  
8 Infettive Arcispedale S. Maria Nuova-IRCSS, Reggio Emilia, Italy): Elisa Garlassi and Romina  
9 Corsini; ROMA (National Institute for Infectious Diseases "L. Spallanzani" IRCCS, Rome, Italy):  
10 Roberta Gagliardini, Marisa Fusto and Andrea Antinori; (Infectious Disease Clinic, Tor Vergata  
11 University Hospital PTV, Rome, Italy): Loredana Sarmati, Vincenzo Malagnino; (UOC Malattie  
12 Infettive, Infectious Disease Department, Fondazione Policlinico Universitario Agostino Gemelli  
13 IRCCS, Rome, Italy): Silvia Lamonica, Simona Di Giambenedetto, and Tiziana Mulas; SANREMO  
14 (Department of Infectious Diseases, Sanremo Hospital, Sanremo, Italy): Giovanni Cenderello and  
15 Rachele Pincino; SIENA (Department of Medical Sciences, Infectious and Tropical Diseases Unit,  
16 University Hospital of Siena, Siena, Italy): Mario Tumbarello, Massimiliano Fabbiani, Francesca  
17 Panza, and Ilaria Rancan; TORINO (Unit of Infectious Diseases, Department of Medical Sciences,  
18 University of Turin, Turin, Italy): Giovanni Di Perri, Stefano Bonora, Micol Ferrara, and Silvia  
19 Fantino; TRIESTE (Infectious Diseases Unit, Trieste University Hospital ASUGI, Trieste, Italy):  
20 Roberto Luzzati and Andrea Misin; VERONA (UOS Malattie Infettive dell'Azienda Scaligera di  
21 Verona, Verona, Italy): Marina Malena and Marta Fiscon.

22  
23  
24  
25  
26  
27  
28  
29  
30  
31  
32  
33  
34  
35  
36  
37  
38  
39  
40  
41  
42  
43  
44  
45  
46  
47 **Contributors:** AnCa, LG, VS, and TC planned and designed the cohort profile description. LG and  
48 RL performed statistical analysis. TC, LG and VS drafted the manuscript. RL, RG, FL, MF, AMC,  
49 EF, ADB, AdCe, LC, FM, GM, GC, SR, MZ, MMS, and AnCa revised the manuscript and approved  
50 the final version. TC, LG, VS, and AnCa, as guarantors, accepts full responsibility of the work, had  
51 access to the data, and controlled the decision to publish.

52  
53  
54  
55  
56  
57  
58 **Funding:** The authors have not declared a specific grant for this research from any funding agency  
59 in the public, commercial or not-for-profit sectors.  
60

1  
2  
3 **Competing interests:** PRESTIGIO Registry received funding from Gilead Sciences, ViiV  
4 Healthcare, Merck Sharp & Dohme, and Theratechnologies.  
5

6  
7 RG reports payments to her institution from Gilead Sciences, personal fees for speaker panels and  
8 educational material from ViiV Healthcare, Merck Sharp and Dohme, and Gilead Sciences, advisory  
9 boards from Theratechnologies, Janssen-Cilag, and Gilead Sciences. FL reports personal fees for  
10 speaker panels from ViiV Healthcare, Janssen-Cilag, and Merck Sharp and Dohme, travel grants from  
11 Gilead Sciences, ViiV Healthcare, and Janssen-Cilag, advisory boards from ViiV Healthcare and  
12 Janssen-Cilag. EF reports personal fees for consultancy from Merck Sharp and Dohme, ViiV  
13 Healthcare, Gilead Sciences, and Swedish Orphan Biovitrum, speaker panels and educational  
14 material from ViiV Healthcare and Gilead Sciences, advisory boards from ViiV Healthcare, Gilead  
15 Sciences, and Merck Sharp and Dohme. ADB reports personal fees for speaker panels and educational  
16 material from ViiV Healthcare and Gilead Sciences, travel grants from ViiV Healthcare. AdCe  
17 reports personal fees for speaker panels from ViiV Healthcare. FM reports personal fees for  
18 consultancy and advisory boards from Merck Sharp and Dohme, ViiV Healthcare, and Gilead  
19 Sciences. GM reports personal fees for speaker panels and educational material from Gilead Sciences,  
20 travel grants from Janssen-Cilag, Gilead Sciences, and ViiV Healthcare, advisory boards from Gilead  
21 Sciences, ViiV Healthcare, and Angelini Pharma. GC reports personal fees for speaker panels and  
22 educational material from Gilead Sciences, ViiV Healthcare, and AbbVie, travel grants from Gilead  
23 Sciences. SR reports payments to his institution from Gilead Sciences, Janssen-Cilag, and ViiV  
24 Healthcare, personal fees for travel grants from Gilead Sciences, Janssen-Cilag, and ViiV Healthcare,  
25 advisory boards from Gilead Sciences, Janssen-Cilag, ViiV Healthcare, and Merck Sharp and Dohme.  
26 MZ reports personal fees for consultancy, speaker panels and educational material from Gilead  
27 Sciences, ViiV Healthcare, and Merck Sharp and Dohme. MMS reports personal fees for speaker  
28 panels and educational material from ViiV Healthcare, Merck Sharp and Dohme, and Janssen-Cilag,  
29 advisory boards from ViiV Healthcare and Theratechnologies. VS reports grants from Gilead Sciences,  
30 personal fees for speaker panels from Gilead Sciences, ViiV Healthcare, and Merck Sharp & Dohme.  
31  
32  
33  
34  
35  
36  
37  
38  
39  
40  
41  
42  
43  
44  
45  
46  
47  
48  
49  
50  
51  
52  
53  
54  
55  
56  
57  
58  
59  
60



1  
2  
3 AnCa reports personal fees for advisory boards, speaker panels and educational materials from Gilead  
4  
5 Sciences, ViiV Healthcare, Janssen-Cilag, Merck Sharp & Dohme, and Theratechnologies. All other  
6  
7 authors: no potential conflicts.  
8  
9

10 **Patient and public involvement:** Patients and/or the public were involved in the design, or conduct,  
11  
12 or reporting, or dissemination plans of this research. Refer to the Cohort description section for further  
13  
14 details.  
15  
16

17 **Provenance and peer review:** Not commissioned; externally peer reviewed.  
18  
19  
20

### 21 **Data availability statement**

22  
23 Data can be made available upon reasonable request.  
24  
25  
26  
27

### 28 **Ethics statements**

#### 29 **Patient consent for publication**

30  
31 Not applicable.  
32  
33  
34

#### 35 **Ethics approval**

36  
37 The PRESTIGIO Registry was approved by the Ethic Committee of the coordinating center (IRCCS  
38  
39 San Raffaele Scientific Institute, protocol number 41/int/December 2017) and by Ethic Committees  
40  
41 of the participating Centers.  
42  
43  
44  
45  
46  
47  
48  
49  
50  
51  
52  
53  
54  
55  
56  
57  
58  
59  
60

## References

- 1 Smith CJ, Ryom L, Weber R, *et al.* Trends in underlying causes of death in people with HIV from 1999 to 2011 (D:A:D): a multicohort collaboration. *Lancet* 2014;384:241-8.
- 2 Legarth RA, Ahlström MG, Kronborg G *et al.* Long-Term Mortality in HIV-Infected Individuals 50 Years or Older: A Nationwide, Population-Based Cohort Study. *J Acquir Immune Defic Syndr* 2016;71:213-8.
- 3 Antiretroviral Therapy Cohort Collaboration. Survival of HIV-positive patients starting antiretroviral therapy between 1996 and 2013: a collaborative analysis of cohort studies. *Lancet HIV* 2017;4:e349-56.
- 4 Marcus JL, Leyden WA, Alexeeff SE, *et al.* Comparison of Overall and Comorbidity-Free Life Expectancy Between Insured Adults With and Without HIV Infection, 2000-2016. *JAMA Netw Open* 2020;3:e207954.
- 5 Wandeler G, Johnson LF, Egger M. Trends in life expectancy of HIV-positive adults on antiretroviral therapy across the globe: comparisons with general population. *Curr Opin HIV AIDS* 2016 Sep;11:492-500.
- 6 Armenia D, Di Carlo D, Flandre P, *et al.* HIV MDR is still a relevant issue despite its dramatic drop over the years. *J Antimicrob Chemother* 2020;75:1301-10.
- 7 Cutrell J, Jodlowski T, Bedimo R. The management of treatment-experienced HIV patients (including virologic failure and switches). *Ther Adv Infect Dis* 2020;7:2049936120901395.
- 8 Priest J, Hulbert E, Gilliam BL, *et al.* Characterization of Heavily Treatment-Experienced People With HIV and Impact on Health Care Resource Utilization in US Commercial and Medicare Advantage Health Plans. *Open Forum Infect Dis* 2021;8:ofab562.
- 9 Pelchen-Matthews A, Borges ÁH, Reekie J, *et al.* Prevalence and Outcomes for Heavily Treatment-Experienced Individuals Living With Human Immunodeficiency Virus in a European Cohort. *J Acquir Immune Defic Syndr* 2021;87:806-17.

- 1  
2  
3 10 Pelchen-Matthews A, Ryom L, Borges ÁH, *et al.* Aging and the evolution of comorbidities among  
4 HIV-positive individuals in a European cohort. *AIDS* 2018;32:2405-16.  
5  
6  
7  
8 11 Enriquez M, McKinsey DS. Strategies to improve HIV treatment adherence in developed  
9 countries: clinical management at the individual level. *HIV AIDS (Auckl)* 2011;3:45-51.  
10  
11  
12 12 Zaccarelli M, Tozzi V, Lorenzini P, *et al.* Multiple drug class-wide resistance associated with  
13 poorer survival after treatment failure in a cohort of HIV-infected patients. *AIDS* 2005;19:1081-9.  
14  
15  
16 13 Spivack S, Pagkalinawan S, Samuel R, *et al.* HIV: how to manage heavily treatment-experienced  
17 patients. *Drugs Context* 2022;11:2021-9-1.  
18  
19  
20 14 Galli L, Parisi MR, Poli A, *et al.* Burden of Disease in PWH Harboring a Multidrug-Resistant  
21 Virus: Data From the PRESTIGIO Registry. *Open Forum Infect Dis* 2020;7:ofaa456.  
22  
23  
24 15 Davy-Mendez T, Eron JJ, Brunet L, *et al.* New antiretroviral agent use affects prevalence of HIV  
25 drug resistance in clinical care populations. *AIDS* 2018;32:2593-603.  
26  
27  
28 16 Lombardi F, Giacomelli A, Armenia D, *et al.* Prevalence and factors associated with HIV-1 multi-  
29 drug resistance over the past two decades in the Italian ARCA database. *Int J Antimicrob Agents*  
30 2021;57:106252.  
31  
32  
33 17 World Health Organization. HIV drug resistance report 2021.  
34 <https://www.who.int/publications/i/item/9789240038608>; 2021 [accessed 31 July 2023].  
35  
36  
37 18 Barabona G, Mahiti M, Masoud S, *et al.* Pre-treatment and acquired HIV drug resistance in Dar  
38 es Salaam, Tanzania in the era of tenofovir and routine viral load monitoring. *J Antimicrob*  
39 *Chemother* 2019;74:3016-20.  
40  
41  
42 19 von Braun A, Sekaggya-Wiltshire C, Bachmann N, *et al.* HIV-1 Drug Resistance Among Ugandan  
43 Adults Attending an Urban Out-Patient Clinic. *J Acquir Immune Defic Syndr* 2018;78:566-73.  
44  
45  
46 20 Inzaule SC, Hamers RL, Mukui I, *et al.* Emergence of untreatable, multidrug-resistant HIV-1 in  
47 patients failing second-line therapy in Kenya. *AIDS* 2017;31:1495-8.  
48  
49  
50  
51  
52  
53  
54  
55  
56  
57  
58  
59  
60

- 1  
2  
3 21 Ngoufack Jagni Semengue E, Santoro MM, Ndze VN, *et al.* HIV-1 integrase resistance associated  
4 mutations and the use of dolutegravir in Sub-Saharan Africa: A systematic review and meta-analysis.  
5  
6 *PLoS Glob Public Health* 2022;2:e0000826.  
7  
8  
9  
10 22 Pursuing Later Treatment Option II (PLATO II) project team; Observational HIV Epidemiological  
11 Research Europe (COHERE) Group; Costagliola D, *et al.* Trends in virological and clinical outcomes  
12 in individuals with HIV-1 infection and virological failure of drugs from three antiretroviral drug  
13 classes: a cohort study. *Lancet Infect Dis* 2012;12:119-27.  
14  
15  
16  
17  
18 23 Clemente T, Lolatto R, Papaioannu Borjesson R, *et al.* Sexually transmitted infections in people  
19 with multidrug-resistant HIV: data from the PRESTIGIO Registry. *AIDS* 2023 (in press).  
20  
21  
22  
23 24 Hunt PW, Lee SA, Siedner MJ. Immunologic Biomarkers, Morbidity, and Mortality in Treated  
24 HIV Infection. *J Infect Dis* 2016;214 Suppl 2:S44-50.  
25  
26  
27  
28 25 Erlandson KM, Allshouse AA, Jankowski CM, *et al.* Association of functional impairment with  
29 inflammation and immune activation in HIV type 1-infected adults receiving effective antiretroviral  
30 therapy. *J Infect Dis* 2013;208:249-59.  
31  
32  
33  
34 26 Mooney S, Tracy R, Osler T, *et al.* Elevated Biomarkers of Inflammation and Coagulation in  
35 Patients with HIV Are Associated with Higher Framingham and VACS Risk Index Scores. *PLoS One*  
36 2015;10:e0144312.  
37  
38  
39  
40 27 Montoya JL, Campbell LM, Paolillo EW, *et al.* Inflammation Relates to Poorer Complex Motor  
41 Performance Among Adults Living With HIV on Suppressive Antiretroviral Therapy. *J Acquir*  
42 *Immune Defic Syndr* 2019;80:15-23.  
43  
44  
45  
46 28 Kuller LH, Tracy R, Belloso W, *et al.* Inflammatory and coagulation biomarkers and mortality in  
47 patients with HIV infection. *PLoS Med* 2008;5:e203.  
48  
49  
50  
51 29 Hunt PW, Sinclair E, Rodriguez B, *et al.* Gut epithelial barrier dysfunction and innate immune  
52 activation predict mortality in treated HIV infection. *J Infect Dis* 2014;210:1228-38.  
53  
54  
55  
56  
57  
58  
59  
60

- 1  
2  
3 30 So-Armah KA, Tate JP, Chang CH, *et al.* Do Biomarkers of Inflammation, Monocyte Activation,  
4 and Altered Coagulation Explain Excess Mortality Between HIV Infected and Uninfected People? *J*  
5 *Acquir Immune Defic Syndr* 2016;72:206-13.  
6  
7  
8  
9  
10 31 Freiberg MS, Bebu I, Tracy R, *et al.* D-Dimer Levels before HIV Seroconversion Remain Elevated  
11 Even after Viral Suppression and Are Associated with an Increased Risk of Non-AIDS Events. *PLoS*  
12 *One* 2016;11:e0152588.  
13  
14  
15  
16  
17 32 Clemente T, Caccia R, Galli L, *et al.* Inflammation burden score in multidrug-resistant HIV-1  
18 infection. *J Infect* 2023;86:453-61.  
19  
20  
21  
22 33 Castagna A, Spagnuolo V, Galli L, *et al.* Simplification to atazanavir/ritonavir monotherapy for  
23 HIV-1 treated individuals on virological suppression: 48-week efficacy and safety results. *AIDS*  
24 2014;28:2269-79.  
25  
26  
27  
28  
29 34 Santoro MM, Fornabaio C, Malena M, *et al.* Susceptibility to HIV-1 integrase strand transfer  
30 inhibitors (INSTIs) in highly treatment-experienced patients who failed an INSTI-based regimen. *Int*  
31 *J Antimicrob Agents* 2020;56:106027.  
32  
33  
34  
35 35 Saladini F, Giammarino F, Maggiolo F, *et al.* Residual phenotypic susceptibility to doravirine in  
36 multidrug-resistant HIV-1 from subjects enrolled in the PRESTIGIO Registry. *Int J Antimicrob*  
37 *Agents* 2023;61:106737.  
38  
39  
40  
41  
42 36 Saladini F, Giannini A, Giammarino F, *et al.* In vitro susceptibility to fostemsavir is not affected  
43 by long-term exposure to antiviral therapy in MDR HIV-1-infected patients. *J Antimicrob Chemother*  
44 2020;75:2547-53.  
45  
46  
47  
48  
49 37 Rusconi S, Saladini F, Bellocchi MC, *et al.* Lerolimab (PRO 140) in vitro activity against 4-class  
50 drug resistant HIV-1 from heavily treatment experienced subjects. *Pharmacol Res* 2022;176:106064.  
51  
52  
53  
54 38 Armenia D, Santoro MM, Bellocchi MC, *et al.* Viral resistance burden and APOBEC editing  
55 correlate with virological response in heavily treatment-experienced people living with multi-drug  
56 resistant HIV. *Int J Antimicrob Agents* 2022;59:106492.  
57  
58  
59  
60

1  
2  
3 39 Labate L, Bruzzone B, Spagnuolo V, *et al.* PRESTIGIO RING: “A 59-year-old HIV-1 positive,  
4 highly treatment-experienced woman failing darunavir/ ritonavir plus raltegravir”. *New Microbiol*  
5  
6 2023;46:226-30.  
7

8  
9  
10 40 Castagna A, Ferrara M, Galli L, *et al.* Long-term efficacy of dolutegravir in treatment-experienced  
11 subjects failing therapy with HIV-1 integrase strand inhibitor-resistant virus. *J Antimicrob Chemother*  
12  
13 2018;73:177-82.  
14

15  
16  
17 41 Canetti D, Galli L, Gianotti N, *et al.* Simplification to High Genetic Barrier 2-Drug Regimens in  
18 People Living With HIV Harboring 4-Class Resistance Enrolled in the PRESTIGIO Registry. *J*  
19  
20  
21  
22  
23  
24  
25  
26  
27  
28  
29  
30  
31  
32  
33  
34  
35  
36  
37  
38  
39  
40  
41  
42  
43  
44  
45  
46  
47  
48  
49  
50  
51  
52  
53  
54  
55  
56  
57  
58  
59  
60

*Acquir Immune Defic Syndr* 2020;84:e24-8.

**Table 1. Demographic, socio-economic and lifestyle description of the PRESTIGIO Registry at last available visit (freezing date: 14<sup>th</sup> March 2023)**

| <b>Characteristics</b> | <b>Overall (n=229)</b> |             |
|------------------------|------------------------|-------------|
| Age (years)            | 58.3 (53.6 – 61.6)     |             |
| Gender at birth        |                        |             |
|                        | Female                 | 63 (27.5%)  |
|                        | Male                   | 166 (72.5%) |
| Birth region           |                        |             |
|                        | Italy                  | 210 (91.7%) |
|                        | Europe except Italy    | 8 (3.5%)    |
|                        | Africa                 | 8 (3.4%)    |
|                        | South America          | 2 (0.9%)    |
|                        | Asia                   | 1 (0.4%)    |
| Ethnicity              |                        |             |
|                        | Caucasian              | 218 (95.2%) |
|                        | Black                  | 9 (3.9%)    |
|                        | Hispanic               | 2 (0.9%)    |
| Smoking habit          |                        |             |
|                        | Yes                    | 92 (40.2%)  |
|                        | No                     | 58 (25.3%)  |
|                        | Previous               | 38 (16.6%)  |

|                                     |                             |            |
|-------------------------------------|-----------------------------|------------|
|                                     | Unknown                     | 41 (17.9%) |
| Reason for not being in active care |                             |            |
|                                     | Dead                        | 30 (13.1%) |
|                                     | Emigrated/Lost to follow-up | 10 (4.4%)  |

Data reported as frequency (percentage) or median (interquartile range), as appropriate.



**Table 2. Virological, immunological and treatment description of the PRESTIGIO Registry at the last available visit (freezing date: 14<sup>th</sup> March 2023)**

| Characteristics                                                              | Overall (n=229)    |
|------------------------------------------------------------------------------|--------------------|
| Mode of HIV transmission                                                     |                    |
| Heterosexual                                                                 | 54 (23.6%)         |
| Men who have sex with men/Bisexual                                           | 56 (24.5%)         |
| Intravenous drug use                                                         | 56 (24.5%)         |
| Mother to child                                                              | 21 (9.2%)          |
| Unknown/Other                                                                | 42 (18.3%)         |
| Years since HIV diagnosis                                                    | 29.8 (25.3 – 33.7) |
| Years since evidence of 4-class drug resistance                              | 7.7 (4.8 - 10.2)   |
| HIV-1 RNA (copies/mL)                                                        |                    |
| <50                                                                          | 162 (70.7%)        |
| 50 – 199                                                                     | 28 (12.2%)         |
| 200 – 999                                                                    | 14 (6.1%)          |
| ≥1000                                                                        | 25 (10.9%)         |
| HIV-1 RNA <50 copies/mL for ≥6 months without subsequent virological failure | 118 (51.5%)        |
| CD4 <sup>+</sup> T-cell count (cells/μL)                                     | 533 (330.5 – 794)  |
| CD4 <sup>+</sup> T-cell count (cells/μL)                                     |                    |
| <200                                                                         | 33 (14.4%)         |
| 200 – 349                                                                    | 31 (13.5%)         |

|                                               |                               |                      |
|-----------------------------------------------|-------------------------------|----------------------|
|                                               | 350 – 499                     | 43 (18.8%)           |
|                                               | ≥500                          | 122 (53.3%)          |
| CD8 <sup>+</sup> T-cell count (cells/μL)      |                               | 892.5 (664.5 - 1260) |
| CD4 <sup>+</sup> /CD8 <sup>+</sup> ratio      |                               | 0.63 (0.33 - 0.90)   |
| CD4 <sup>+</sup> nadir (cells/μL)             |                               | 82 (17 - 183)        |
| HIV-1 subtype                                 |                               |                      |
|                                               | B                             | 163 (71.2%)          |
|                                               | C                             | 1 (0.4%)             |
|                                               | F                             | 4 (1.7%)             |
|                                               | G                             | 1 (0.4%)             |
|                                               | Circulating recombinant forms | 7 (3.1%)             |
|                                               | Missing                       | 53 (23.1%)           |
| Tropism                                       |                               |                      |
|                                               | CCR5-tropic                   | 90 (39.3%)           |
|                                               | CXCR4-tropic or dual mixed    | 94 (41.0%)           |
|                                               | Missing                       | 45 (19.7%)           |
| CCR-5 tropism detected in all tests performed |                               | 37 (16.2%)           |
| On ART                                        |                               | 229 (100%)           |
| ART duration (years)                          |                               | 25.8 (21.9 – 28.8)   |
| Calendar year of ART start                    |                               |                      |

|                                                  |       |             |
|--------------------------------------------------|-------|-------------|
|                                                  | <1998 | 148 (64.6%) |
|                                                  | ≥1998 | 81 (35.4%)  |
| Number of antiretrovirals in the current regimen |       |             |
|                                                  | ≤3    | 134 (58.5%) |
|                                                  | 4 - 5 | 89 (38.9%)  |
|                                                  | 6 - 7 | 6 (2.6%)    |
| NRTI-containing regimens                         |       | 167 (72.9%) |
| NNRTI-containing regimens                        |       | 71 (31%)    |
| PI-containing regimens                           |       | 168 (73.4%) |
| INSTI-containing regimens                        |       | 195 (85.2%) |
| Maraviroc-containing regimens                    |       | 48 (21%)    |
| Enfuvirtide-containing regimens                  |       | 6 (2.6%)    |
| Fostemsavir-containing regimens                  |       | 17 (7.4%)   |
| Ibalizumab-containing regimens                   |       | 7 (3.1%)    |
| Lenacapavir-containing regimens                  |       | 9 (3.9%)    |

Data reported as frequency (percentage) or median (interquartile range), as appropriate. ART: antiretroviral therapy; HIV: human immunodeficiency virus; INSTI: integrase strand transfer inhibitor; NNRTI: non-nucleoside reverse transcriptase inhibitors; NRTI: nucleoside reverse transcriptase inhibitor; PI: protease inhibitor.

1  
2  
3 **Figure captions.**  
4  
5

6 **Figure 1.** PRESTIGIO timeline. Genotypic resistance tests are collected since the first available from  
7  
8 HIV diagnosis. Follow-up for clinical, laboratory, treatment, and virological data accrues from the  
9  
10 first evidence of 4-class drug resistance (baseline). Plasma and cell sample collection on an annual  
11  
12 basis starts at the date of enrollment in the registry.  
13  
14

15  
16 **Figure 2.** The 39 Infectious Diseases Clinics participating in the PRESTIGIO Registry, located  
17  
18 throughout Italy.  
19  
20

21 **Figure 3.** Year of evidence of 4-class drug resistance.  
22  
23  
24  
25  
26  
27  
28  
29  
30  
31  
32  
33  
34  
35  
36  
37  
38  
39  
40  
41  
42  
43  
44  
45  
46  
47  
48  
49  
50  
51  
52  
53  
54  
55  
56  
57  
58  
59  
60

1  
2  
3  
4  
5  
6  
7  
8  
9  
10  
11  
12  
13  
14  
15  
16  
17  
18  
19  
20  
21  
22  
23  
24  
25  
26  
27  
28  
29  
30  
31  
32  
33  
34  
35  
36  
37  
38  
39  
40  
41  
42  
43  
44  
45  
46  
47  
48  
49  
50  
51  
52  
53  
54  
55  
56  
57  
58  
59  
60

1  
2  
3  
4  
5  
6  
7  
8  
9  
10  
11  
12  
13  
14  
15  
16  
17  
18  
19  
20  
21  
22  
23  
24  
25  
26  
27  
28  
29  
30  
31  
32  
33  
34  
35  
36  
37  
38  
39  
40  
41

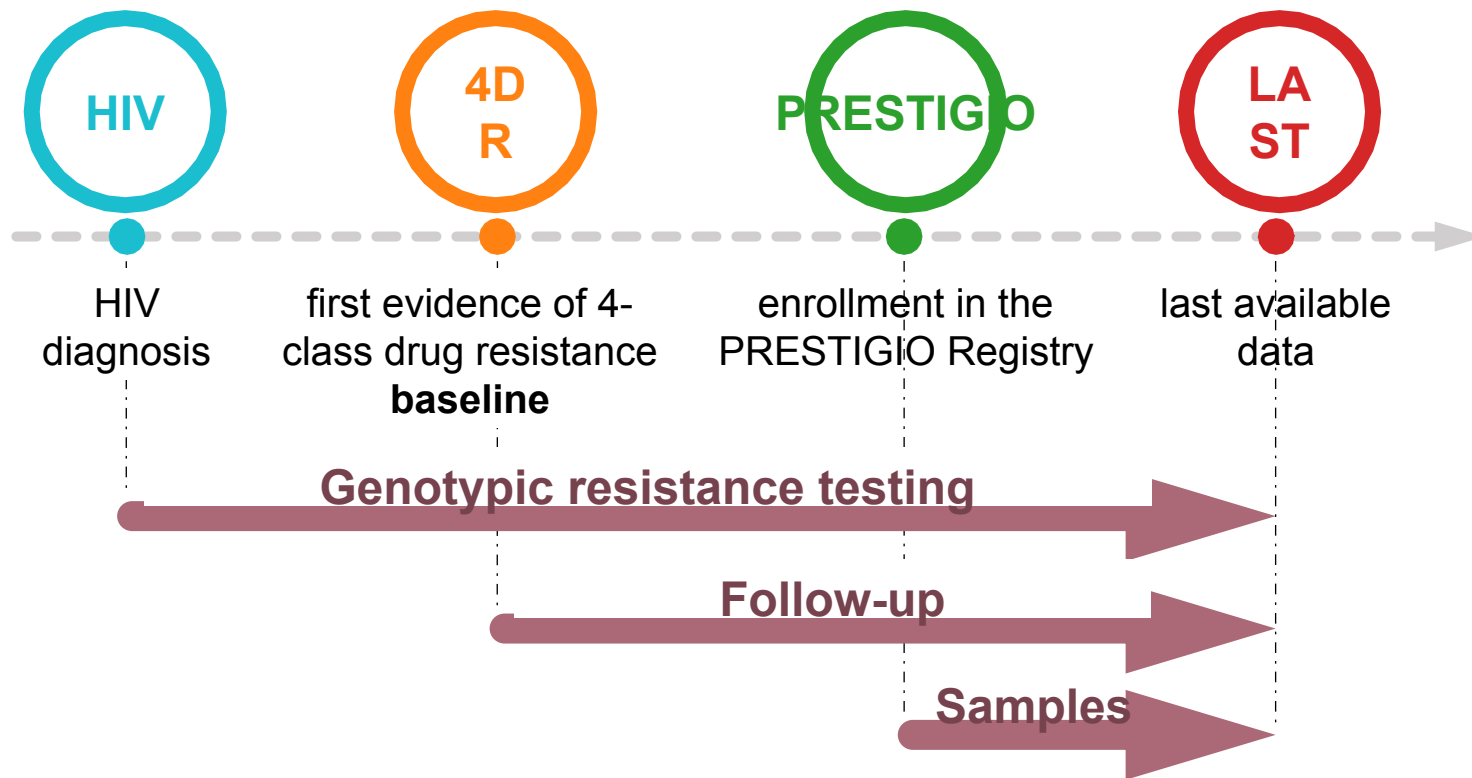

1  
2  
3  
4  
5  
6  
7  
8  
9  
10  
11  
12  
13  
14  
15  
16  
17  
18  
19  
20  
21  
22  
23  
24  
25  
26  
27  
28  
29  
30  
31  
32  
33  
34  
35  
36  
37  
38  
39  
40  
41

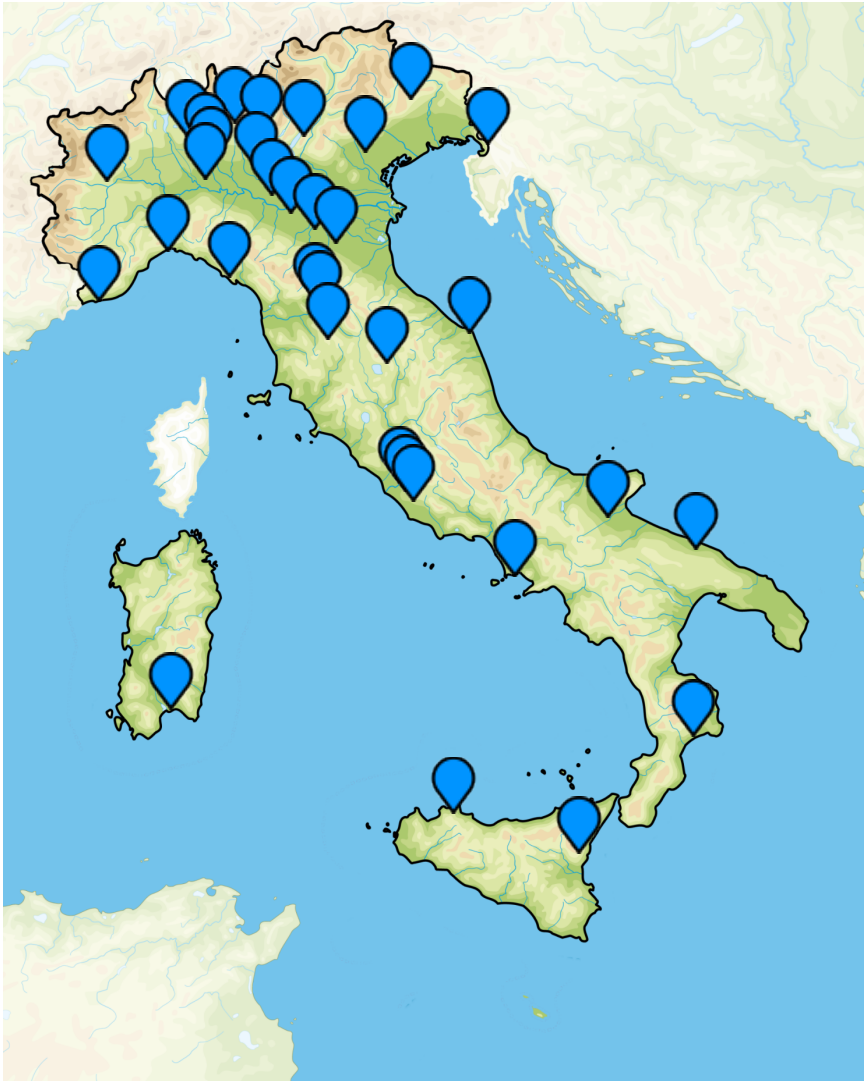

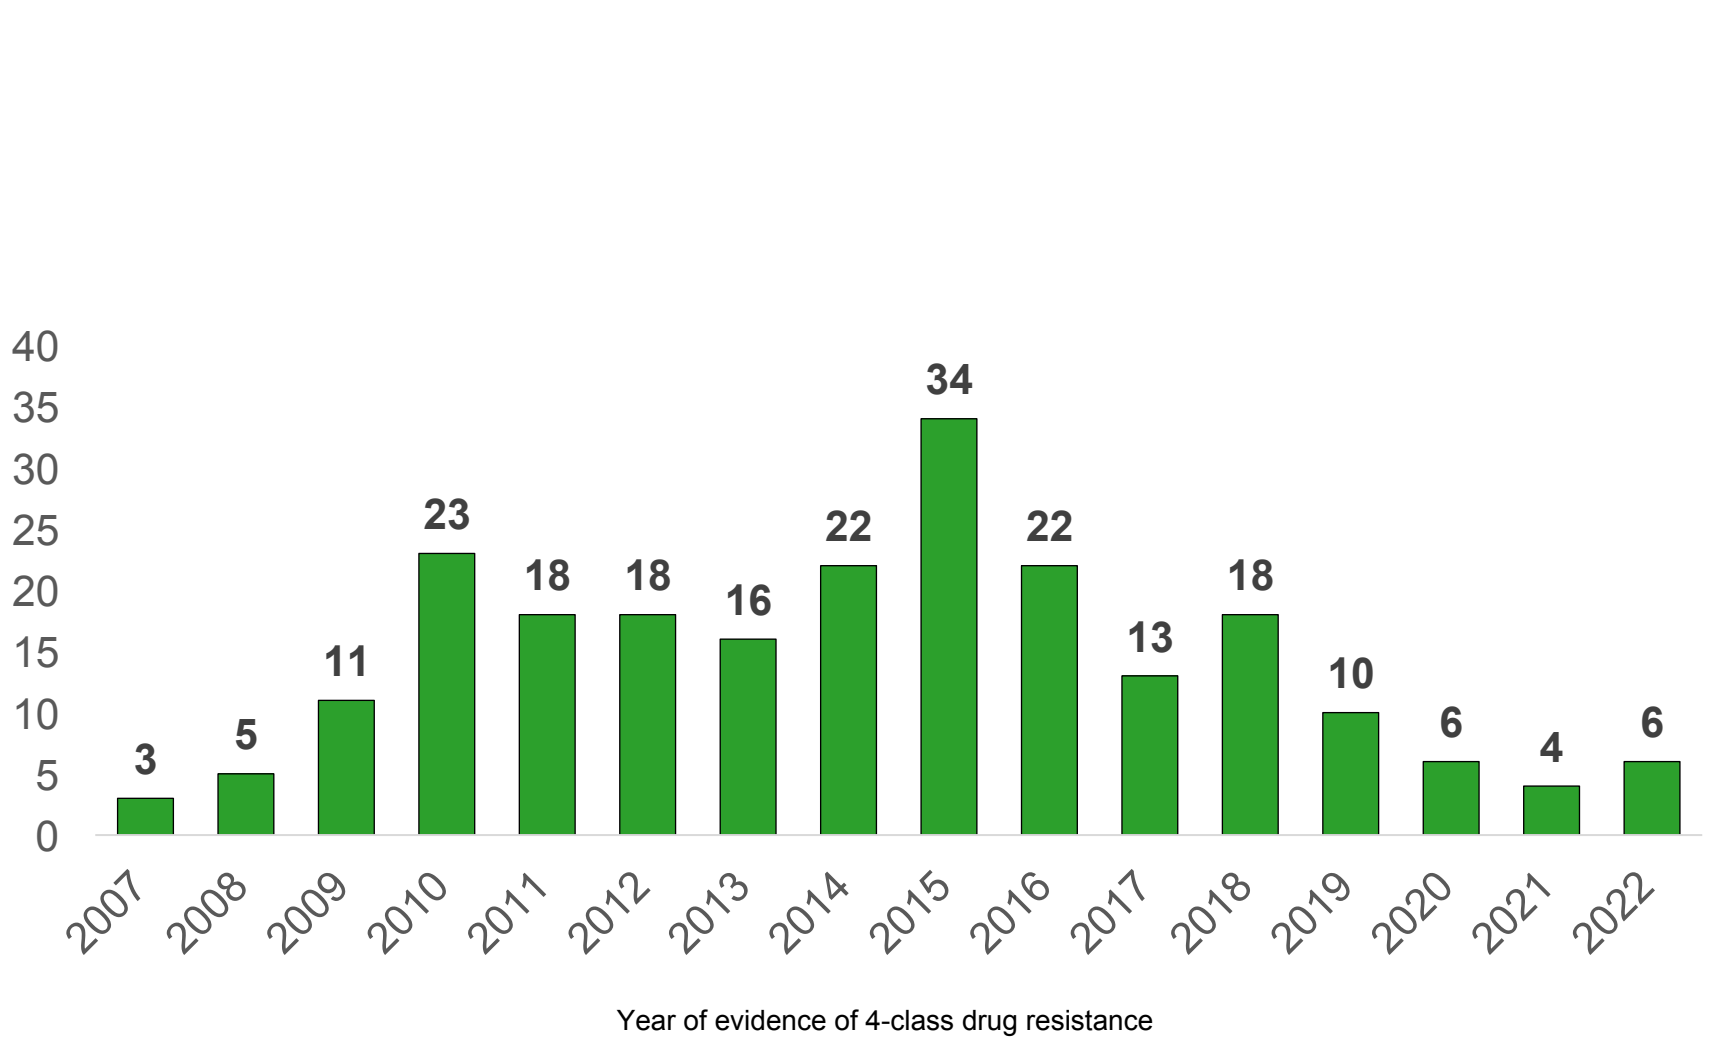



**Online supplemental table 1. Summary of variables included in the PRESTIGIO Registry from the date of evidence of 4-class drug resistance.**

|                               |                                                                                                                                                                                                                                                                                                                                                                                                                                                                                                                                               |
|-------------------------------|-----------------------------------------------------------------------------------------------------------------------------------------------------------------------------------------------------------------------------------------------------------------------------------------------------------------------------------------------------------------------------------------------------------------------------------------------------------------------------------------------------------------------------------------------|
| <b>Socio-demographic data</b> |                                                                                                                                                                                                                                                                                                                                                                                                                                                                                                                                               |
| <i>General</i>                | date of birth, sex at birth, country of birth, ethnicity                                                                                                                                                                                                                                                                                                                                                                                                                                                                                      |
| <i>Lifestyle</i>              | height, weight, smoking habit                                                                                                                                                                                                                                                                                                                                                                                                                                                                                                                 |
| <i>HIV-specific</i>           | mode of HIV transmission, date of last negative HIV test, date of first positive HIV test, date of 4-class drug resistance                                                                                                                                                                                                                                                                                                                                                                                                                    |
| <b>Laboratory results</b>     |                                                                                                                                                                                                                                                                                                                                                                                                                                                                                                                                               |
| <i>HIV-specific</i>           | HIV-1 RNA (copies/mL), HIV-1 RNA before ART start (copies/mL)<br>CD4 <sup>+</sup> T-cell count (cells/ $\mu$ L, %), CD8 <sup>+</sup> T-cell count (cells/ $\mu$ L, %),<br>CD4 <sup>+</sup> /CD8 <sup>+</sup> ratio, CD4 <sup>+</sup> nadir (cells/ $\mu$ L)<br>RNA- and DNA-based genotypic resistance testing ( <i>collected since the first test available, also before evidence of 4-class drug resistance</i> )<br>subtype, viral tropism ( <i>collected since the first available, also before evidence of 4-class drug resistance</i> ) |
| <i>Other</i>                  | hepatitis B and C serologies, HBV DNA, HCV RNA<br>complete blood cell count<br>plasma glucose, triglycerides, total/HDL-/LDL-cholesterol, creatinine,<br>transaminases, direct and indirect bilirubin                                                                                                                                                                                                                                                                                                                                         |
| <b>Treatment</b>              |                                                                                                                                                                                                                                                                                                                                                                                                                                                                                                                                               |
| <i>Antiretroviral therapy</i> | date of antiretroviral therapy start, date of highly active antiretroviral therapy (defined as a combination of drugs from at least 2 different classes) start                                                                                                                                                                                                                                                                                                                                                                                |

|                                        |                                                                                                                                                                                                                                                                                                                       |
|----------------------------------------|-----------------------------------------------------------------------------------------------------------------------------------------------------------------------------------------------------------------------------------------------------------------------------------------------------------------------|
|                                        | regimens from baseline to the last available visit (including start and stop dates, dose and mode of administration, reason for switch)                                                                                                                                                                               |
| <i>Other medications</i>               | specific drugs (including start and stop dates, dose and mode of administration, reason for stop)                                                                                                                                                                                                                     |
| <i>Vaccines</i>                        | date and type of vaccinations                                                                                                                                                                                                                                                                                         |
| <b>AIDS diagnoses</b>                  | date and type of AIDS events                                                                                                                                                                                                                                                                                          |
| <b>Comorbidities</b>                   | non-AIDS malignancies, diabetes, arterial hypertension requiring treatment, major adverse cardiovascular events, chronic liver or kidney diseases, osteoporosis and related fractures, neurocognitive disorders, chronic obstructive pulmonary disease, etc. (including dates of diagnosis and eventually resolution) |
| <b>Hospitalizations</b>                | dates and reason for hospitalization                                                                                                                                                                                                                                                                                  |
| <b>Pregnancies</b>                     | dates of pregnancy, date of delivery, etc.                                                                                                                                                                                                                                                                            |
| <b>Sexually transmitted infections</b> | date of diagnosis, type, and treatment of sexually transmitted infections                                                                                                                                                                                                                                             |
| <b>Death</b>                           | date and reason of death                                                                                                                                                                                                                                                                                              |

1  
2  
3  
4  
5  
6  
7  
8  
9  
10  
11  
12  
13  
14  
15  
16  
17  
18  
19  
20  
21  
22  
23  
24  
25  
26  
27  
28  
29  
30  
31  
32  
33  
34  
35  
36  
37  
38  
39  
40  
41  
42  
43  
44  
45  
46  
47  
48  
49  
50  
51  
52  
53  
54  
55  
56  
57  
58  
59  
60**Online supplemental figure captions.**

**Online supplemental figure 1.** Resistance-associated mutations present in  $\geq 20\%$  of 4DR-PLWH from the PRESTIGIO Registry. All RNA-based genotypic resistance tests through Sanger sequencing were considered cumulatively. Percentages evaluated on 229 PLWH for NRTI, NNRTI, and PI resistance-associated mutations, on 175 PLWH with at least one available integrase genotype for INSTI resistance-associated mutations. INSTI: integrase strand transfer inhibitor; NNRTI: non-nucleoside reverse transcriptase inhibitor; NRTI: nucleoside reverse transcriptase inhibitor; PI: protease inhibitor; 4DR-PLWH: people living with 4-class drug-resistant HIV.

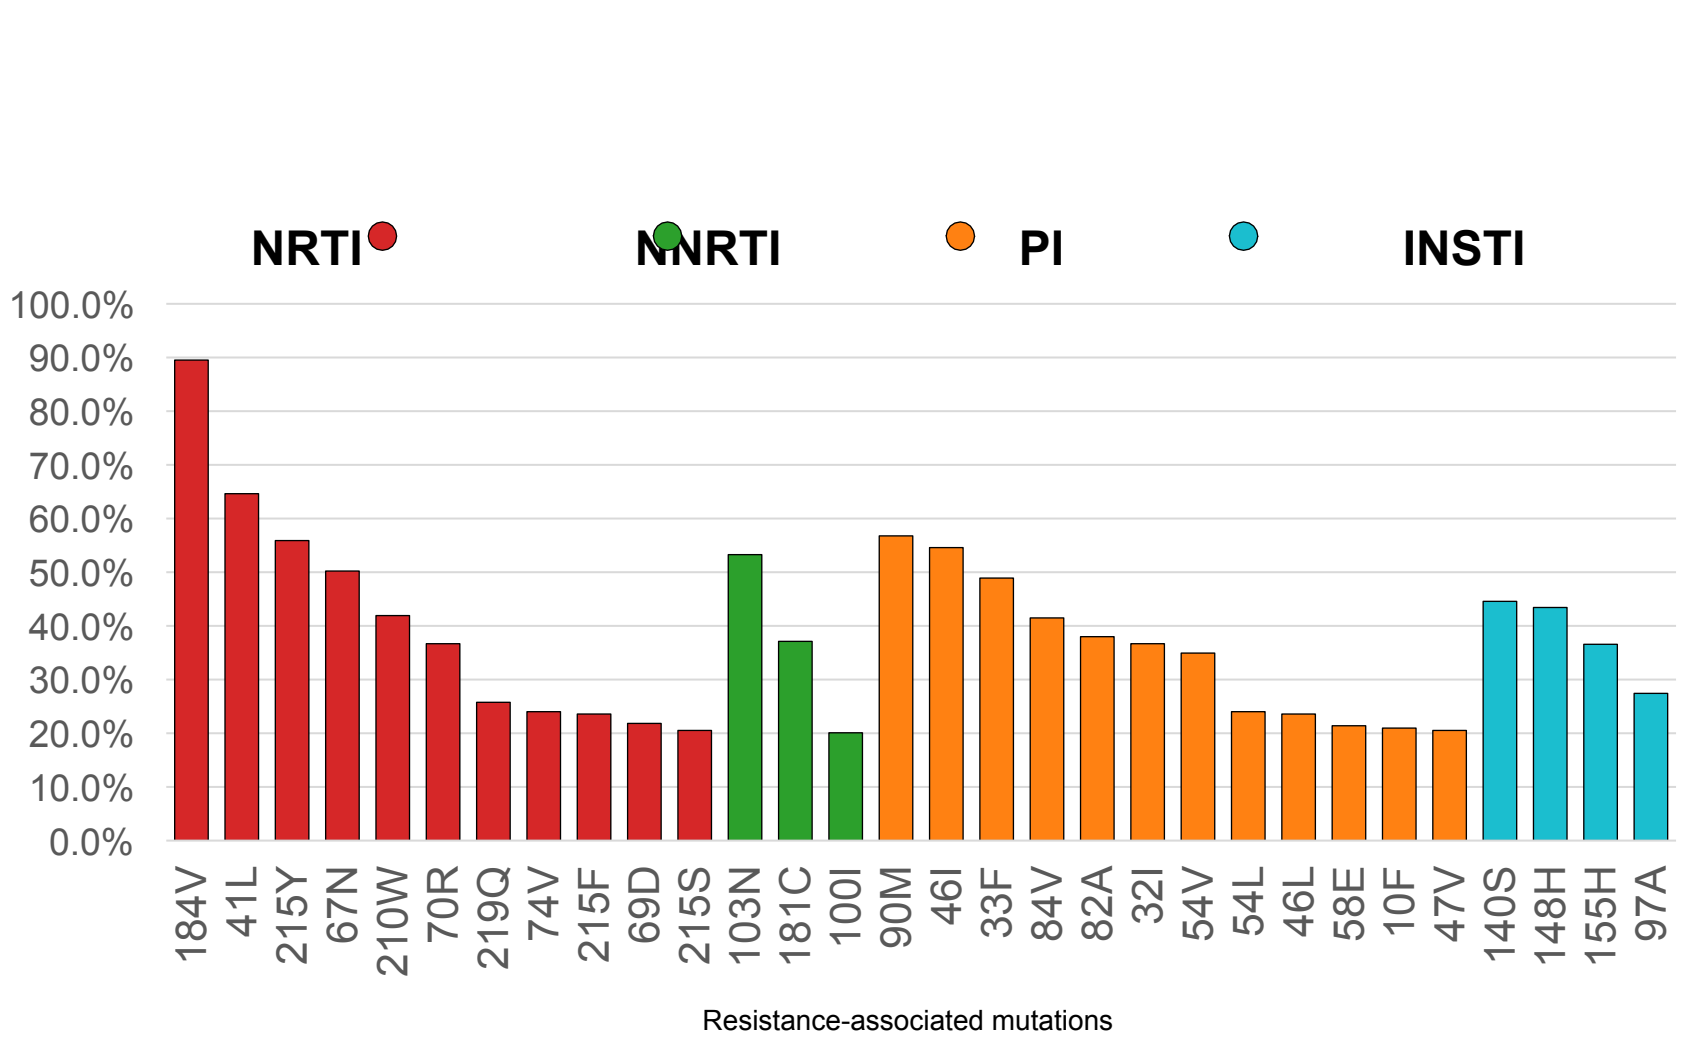

# BMJ Open

## Cohort profile: PRESTIGIO, an Italian prospective registry-based cohort of people with HIV-1 resistant to reverse transcriptase, protease, and integrase inhibitors

|                                 |                                                                                                                                                                                                                                                                                                                                                                                                                                                                                                                                                                                                                                                                                                                                                                                                                                                                                                                                                                                                                                                                                                                                                                                                                                                                                                                                                                                                                                                                                                                                                                                                                                                                                                                                                                                                                                                                                                                                                                                                  |
|---------------------------------|--------------------------------------------------------------------------------------------------------------------------------------------------------------------------------------------------------------------------------------------------------------------------------------------------------------------------------------------------------------------------------------------------------------------------------------------------------------------------------------------------------------------------------------------------------------------------------------------------------------------------------------------------------------------------------------------------------------------------------------------------------------------------------------------------------------------------------------------------------------------------------------------------------------------------------------------------------------------------------------------------------------------------------------------------------------------------------------------------------------------------------------------------------------------------------------------------------------------------------------------------------------------------------------------------------------------------------------------------------------------------------------------------------------------------------------------------------------------------------------------------------------------------------------------------------------------------------------------------------------------------------------------------------------------------------------------------------------------------------------------------------------------------------------------------------------------------------------------------------------------------------------------------------------------------------------------------------------------------------------------------|
| Journal:                        | <i>BMJ Open</i>                                                                                                                                                                                                                                                                                                                                                                                                                                                                                                                                                                                                                                                                                                                                                                                                                                                                                                                                                                                                                                                                                                                                                                                                                                                                                                                                                                                                                                                                                                                                                                                                                                                                                                                                                                                                                                                                                                                                                                                  |
| Manuscript ID                   | bmjopen-2023-080606.R1                                                                                                                                                                                                                                                                                                                                                                                                                                                                                                                                                                                                                                                                                                                                                                                                                                                                                                                                                                                                                                                                                                                                                                                                                                                                                                                                                                                                                                                                                                                                                                                                                                                                                                                                                                                                                                                                                                                                                                           |
| Article Type:                   | Cohort profile                                                                                                                                                                                                                                                                                                                                                                                                                                                                                                                                                                                                                                                                                                                                                                                                                                                                                                                                                                                                                                                                                                                                                                                                                                                                                                                                                                                                                                                                                                                                                                                                                                                                                                                                                                                                                                                                                                                                                                                   |
| Date Submitted by the Author:   | 28-Dec-2023                                                                                                                                                                                                                                                                                                                                                                                                                                                                                                                                                                                                                                                                                                                                                                                                                                                                                                                                                                                                                                                                                                                                                                                                                                                                                                                                                                                                                                                                                                                                                                                                                                                                                                                                                                                                                                                                                                                                                                                      |
| Complete List of Authors:       | <p>Clemente, Tommaso; Vita-Salute San Raffaele University; IRCCS Ospedale San Raffaele, Infectious Diseases<br/> Galli, L; IRCCS Ospedale San Raffaele, Infectious Diseases<br/> Lolatto, Riccardo; IRCCS Ospedale San Raffaele, Infectious Diseases<br/> Gagliardini, Roberta; Lazzaro Spallanzani National Institute for Infectious Diseases<br/> Lagi, Filippo; University Hospital Careggi, Infectious and Tropical Diseases Unit<br/> Ferrara, Micol; University of Turin, Unit of Infectious Diseases, Department of Medical Sciences<br/> Cattelan, Anna Maria ; Padua University Hospital, Infectious Diseases Unit, Department of Molecular Medicine<br/> Focà, Emanuele; ASST Spedali Civili di Brescia, Unit of Infectious and Tropical Diseases, Department of Clinical and Experimental Sciences<br/> Di Biagio, Antonio ; IRCCS Ospedale Policlinico San Martino, Clinic of Infectious Diseases<br/> Cervo, Adriana ; Policlinico di Modena, Infectious Diseases Unit<br/> Calza, Leonardo; Azienda Ospedaliere-Universitaria di Bologna Policlinico S Orsola - Malpighi, Unit of Infectious Diseases, Department of Medical and Surgical Sciences<br/> Maggiolo, Franco; Azienda Ospedaliera Papa Giovanni XXIII, Unit of HIV-related Diseases and Experimental Therapies<br/> Marchetti, Giulia; San Paolo University Hospital, Clinic of Infectious Diseases, Department of Health Sciences<br/> Cenderello, Giovanni; Sanremo Civil Hospital, Department of Infectious Diseases<br/> Rusconi, Stefano; Ospedale Civile di Legnano, Infectious Diseases Unit; Università degli Studi di Milano, DIBIC<br/> Zazzi, Maurizio; University of Siena, Department of Medical Biotechnology<br/> Santoro, Maria-Mercedes ; University of Rome Tor Vergata, Department of Experimental Medicine<br/> Spagnuolo, V; IRCCS Ospedale San Raffaele, Infectious Diseases<br/> Castagna, Antonella; Vita-Salute San Raffaele University; IRCCS Ospedale San Raffaele, Infectious Diseases</p> |
| <b>Primary Subject Heading</b>: | HIV/AIDS                                                                                                                                                                                                                                                                                                                                                                                                                                                                                                                                                                                                                                                                                                                                                                                                                                                                                                                                                                                                                                                                                                                                                                                                                                                                                                                                                                                                                                                                                                                                                                                                                                                                                                                                                                                                                                                                                                                                                                                         |

1  
2  
3  
4  
5  
6  
7  
8  
9  
10  
11  
12  
13  
14  
15  
16  
17  
18  
19  
20  
21  
22  
23  
24  
25  
26  
27  
28  
29  
30  
31  
32  
33  
34  
35  
36  
37  
38  
39  
40  
41  
42  
43  
44  
45  
46  
47  
48  
49  
50  
51  
52  
53  
54  
55  
56  
57  
58  
59  
60

|                            |                                                                                                                           |
|----------------------------|---------------------------------------------------------------------------------------------------------------------------|
| Secondary Subject Heading: | Infectious diseases                                                                                                       |
| Keywords:                  | HIV & AIDS < INFECTIOUS DISEASES, Public health < INFECTIOUS DISEASES, REGISTRIES, Sexually Transmitted Disease, VIROLOGY |
|                            |                                                                                                                           |

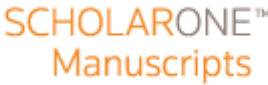

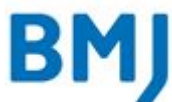

I, the Submitting Author has the right to grant and does grant on behalf of all authors of the Work (as defined in the below author licence), an exclusive licence and/or a non-exclusive licence for contributions from authors who are: i) UK Crown employees; ii) where BMJ has agreed a CC-BY licence shall apply, and/or iii) in accordance with the terms applicable for US Federal Government officers or employees acting as part of their official duties; on a worldwide, perpetual, irrevocable, royalty-free basis to BMJ Publishing Group Ltd ("BMJ") its licensees and where the relevant Journal is co-owned by BMJ to the co-owners of the Journal, to publish the Work in this journal and any other BMJ products and to exploit all rights, as set out in our [licence](#).

The Submitting Author accepts and understands that any supply made under these terms is made by BMJ to the Submitting Author unless you are acting as an employee on behalf of your employer or a postgraduate student of an affiliated institution which is paying any applicable article publishing charge ("APC") for Open Access articles. Where the Submitting Author wishes to make the Work available on an Open Access basis (and intends to pay the relevant APC), the terms of reuse of such Open Access shall be governed by a Creative Commons licence – details of these licences and which [Creative Commons](#) licence will apply to this Work are set out in our licence referred to above.

Other than as permitted in any relevant BMJ Author's Self Archiving Policies, I confirm this Work has not been accepted for publication elsewhere, is not being considered for publication elsewhere and does not duplicate material already published. I confirm all authors consent to publication of this Work and authorise the granting of this licence.

1  
2  
3 **Cohort profile: PRESTIGIO, an Italian prospective registry-based cohort of people with HIV-1**  
4  
5 **resistant to reverse transcriptase, protease, and integrase inhibitors**  
6  
7  
8  
9

10  
11 Tommaso Clemente<sup>1,2</sup>, Laura Galli<sup>2</sup>, Riccardo Lolatto<sup>2</sup>, Roberta Gagliardini<sup>3</sup>, Filippo Lagi<sup>4</sup>, Micol  
12 Ferrara<sup>5</sup>, Anna Maria Cattelan<sup>6</sup>, Emanuele Focà<sup>7</sup>, Antonio Di Biagio<sup>8</sup>, Adriana Cervo<sup>9</sup>, Leonardo  
13 Calza<sup>10</sup>, Franco Maggiolo<sup>11</sup>, Giulia Marchetti<sup>12</sup>, Giovanni Cenderello<sup>13</sup>, Stefano Rusconi<sup>14,15</sup>,  
14 Maurizio Zazzi<sup>16</sup>, Maria Mercedes Santoro<sup>17</sup>, Vincenzo Spagnuolo<sup>2</sup>, Antonella Castagna<sup>1,2</sup> on behalf  
15  
16 of the PRESTIGIO Study Group  
17  
18  
19  
20  
21  
22  
23  
24  
25

26 <sup>1</sup> Vita-Salute San Raffaele University, via Stamira D'Ancona, 20, 20127, Milan, Italy  
27  
28

29 <sup>2</sup> Infectious Diseases, IRCCS San Raffaele Scientific Institute, via Stamira D'Ancona, 20, 20127,  
30 Milan, Italy  
31  
32  
33

34 <sup>3</sup> National Institute for Infectious Diseases "L. Spallanzani" IRCCS, Rome, Italy  
35  
36

37 <sup>4</sup> Infectious and Tropical Diseases Unit, Careggi University Hospital, Florence, Italy  
38  
39

40 <sup>5</sup> Unit of Infectious Diseases, Department of Medical Sciences, University of Turin, Turin, Italy  
41  
42

43 <sup>6</sup> Infectious Diseases Unit, Department of Molecular Medicine, Padua University Hospital, Padua,  
44 Italy  
45  
46  
47

48 <sup>7</sup> Unit of Infectious and Tropical Diseases, Department of Clinical and Experimental Sciences, ASST  
49 Spedali di Brescia, University of Brescia, Brescia, Italy  
50  
51  
52

53 <sup>8</sup> Clinic of Infectious Diseases, IRCCS Policlinico San Martino Hospital, University of Genoa,  
54 Genoa, Italy  
55  
56  
57  
58  
59  
60



1  
2  
3 <sup>9</sup> Infectious Diseases Unit, Policlinico di Modena, Università Degli Studi di Modena e Reggio Emilia,  
4  
5 Modena, Italy  
6  
7

8 <sup>10</sup> Unit of Infectious Diseases, Department of Medical and Surgical Sciences, S. Orsola Hospital,  
9  
10 “Alma Mater Studiorum” University of Bologna, Bologna, Italy  
11  
12

13 <sup>11</sup> Unit of HIV-related Diseases and Experimental Therapies, Azienda Ospedaliera Papa Giovanni  
14  
15 XXIII, Bergamo, Italy  
16  
17

18 <sup>12</sup> Clinic of Infectious Diseases, San Paolo Hospital, ASST Santi Paolo e Carlo, Department of Health  
19  
20 Sciences, University of Milan, Italy  
21  
22

23 <sup>13</sup> Department of Infectious Diseases, Sanremo Hospital, Sanremo, Italy  
24  
25

26 <sup>14</sup> Infectious Diseases Unit, ASST Ovest Milanese, Legnano General Hospital, Legnano, Italy  
27  
28

29 <sup>15</sup> DIBIC, University of Milan, Milan, Italy  
30  
31

32 <sup>16</sup> Department of Medical Biotechnology, University of Siena, Siena, Italy  
33  
34

35 <sup>17</sup> Department of Experimental Medicine, University of Rome “Tor Vergata”, Rome, Italy  
36  
37  
38  
39  
40

41 **Corresponding author’s contact information:**  
42

43 Tommaso Clemente, MD  
44

45 Vita-Salute San Raffaele University  
46

47 Infectious diseases, IRCCS San Raffaele Scientific Institute  
48

49 Via Stamira D’Ancona, 20, 20127, Milan, Italy  
50

51 Email: [clemente.tommaso@hsr.it](mailto:clemente.tommaso@hsr.it)  
52

53 Phone: +39 0226437907  
54

55 Fax: +39 0226437903  
56  
57  
58  
59  
60

## Abstract

**Purpose:** The PRESTIGIO Registry was established in 2017 to collect clinical, virological and immunological monitoring data from people living with 4-class drug resistant human immunodeficiency virus (4DR-PLWH). Key research purposes include the evaluation of residual susceptibility to specific antiretrovirals and validation of treatment and monitoring strategies in this population.

**Participants:** The PRESTIGIO Registry collects annual plasma and peripheral blood mononuclear cell samples and demographic, clinical, virological, treatment and laboratory data from PLWH followed at 39 Italian clinical centers and characterized by intermediate-to-high genotypic resistance to  $\geq 1$  nucleoside reverse transcriptase inhibitors (NRTIs),  $\geq 1$  non-nucleoside reverse transcriptase inhibitors (NNRTIs),  $\geq 1$  protease inhibitors (PIs), plus either intermediate-to-high genotypic resistance to  $\geq 1$  integrase strand transfer inhibitors (INSTIs) or history of virological failure to an INSTI-containing regimen. To date, 229 people have been recorded in the cohort. The most of data are collected from the date of first evidence of 4-class drug resistance (baseline) with some pre-baseline information obtained retrospectively, samples are collected from the date of enrollment in the registry.

**Findings to date:** The open-ended cohort has been used to assess i) prognosis in terms of survival or development of acquired immunodeficiency syndrome (AIDS) or non-AIDS-related clinical events; ii) long-term efficacy and safety of different antiretroviral regimens; iii) virological and immunological factors predictive of clinical outcome and treatment efficacy, especially through analysis of plasma and cell samples.

**Future plans:** The registry can provide new knowledge on how to implement an integrated approach to study PLWH with documented resistance to the 4 main antiretroviral classes, a population with a limited number of individuals characterized by a high degree of frailty and complexity in therapeutic management. Given the scheduled annual updates of PLWH data, the researchers who collaborate in the registry can send study proposals at any time to the Steering Committee of the Registry, which

1  
2  
3 evaluates every 3 months whether the research studies can be conducted on data and biosamples from  
4  
5 the Registry and whether they are aimed at a better understanding of: a specific health condition, the  
6  
7 emergence of comorbidities, the effect of potential treatments or experimental drugs that may have  
8  
9 an impact on disease progression and quality-of-life. Finally, the research studies should aim to be  
10  
11 inclusive, innovative, and in touch with the communities and society as a whole.  
12  
13

14 **Registration:** The PRESTIGIO Registry is registered on ClinicalTrials.gov (NCT04098315).  
15  
16  
17  
18  
19  
20  
21  
22  
23  
24  
25  
26  
27  
28  
29  
30  
31  
32  
33  
34  
35  
36  
37  
38  
39  
40  
41  
42  
43  
44  
45  
46  
47  
48  
49  
50  
51  
52  
53  
54  
55  
56  
57  
58  
59  
60

1  
2  
3  
4  
5  
6  
7  
8  
9  
10  
11  
12  
13  
14  
15  
16  
17  
18  
19  
20  
21  
22  
23  
24  
25  
26  
27  
28  
29  
30  
31  
32  
33  
34  
35  
36  
37  
38  
39  
40  
41  
42  
43  
44  
45  
46  
47  
48  
49  
50  
51  
52  
53  
54  
55  
56  
57  
58  
59  
60

### **Strengths and limitations of this study**

- The registry specifically includes people living with human immunodeficiency virus (HIV) and documented 4-class drug resistance.
- The cohort is readily available for research projects: the data sources (clinical centers) have already been linked and data have been collected in order to enable easier and simpler querying across source systems.
- Annual collection of cryopreserved plasma and peripheral blood mononuclear cell samples for research purposes.
- Limited representativeness of subtype non-B viral strains and non-Italian natives with HIV.
- Incomplete information before evidence of 4-class drug resistance.

## Introduction

Continuous progress in antiretroviral therapy (ART) has resulted in a high rate of virological suppression and a consequent improvement in life expectancy for individuals with human immunodeficiency virus (HIV). [1-5] Nevertheless, heavily treatment-experienced (HTE) people living with HIV (PLWH) have a history of previous virological failures on different antiretroviral regimens and limited treatment options, because of multidrug resistance and/or drug intolerance. [6,7] ART options can also be limited by drug–drug interactions or drug toxicity, due to the need of both prophylaxis or treatment for opportunistic infections and concomitant therapies for multiple comorbidities, that are common in HTE PLWH, [8,9] especially with aging. [10] This fragile group often needs complex, unusual and asymmetrical regimens (mixture of *quaque die* and *bis in die* schedules or oral, subcutaneous and intravenous administrations) with a high pill burden, possibly leading to a suboptimal adherence, which in turn increases the risk of virological failure with emergent resistance and worsens the prognosis. [11,12]

Even though there is no consensus in defining HTE individuals, these PLWH generally have two or less antiretroviral classes available for use, with limited fully active antiretroviral drugs within each class, [13] and represent a group at increased risk of low adherence and clinical progression. Therefore, establishing cohorts aimed to characterize this population better appears essential.

Among these difficult-to-treat individuals, those who harbor a 4-class drug-resistant (4DR) virus, characterized by resistance to nucleoside reverse transcriptase inhibitors (NRTIs), non-nucleoside reverse transcriptase inhibitors (NNRTIs), protease inhibitors (PIs) and integrase strand transfer inhibitors (INSTIs), represent a particular group with a very high burden of disease and very limited therapeutic options. [14] In terms of epidemiology, the prevalence of HIV 4-class drug resistance on a global scale is unknown: a prospective study in North Carolina estimated this prevalence at approximately 1% of PLWH, with a slight increase since 2007. [15] Recent Italian studies quantified subjects with 4DR HIV at about 2% of treatment-experienced PLWH in 2011-2018. [16] According to the most recent World Health Organization (WHO) report on HIV drug resistance

1  
2  
3 (2014-2020), virological suppression [defined as HIV ribonucleic acid (RNA) <1000 copies/mL]  
4 was  $\geq 90\%$  among adults on ART for  $\geq 48$  months in only 6/14 middle- and low-income countries  
5  
6 with available data; in virologically non-suppressed PLWH on a NNRTI-based regimen for  $\geq 48$   
7  
8 months, high-level resistance to efavirenz or nevirapine was estimated to range from 50 to 95%,  
9  
10 resistance to tenofovir from 5 to 56%. [17] However, among individuals failing a dolutegravir-  
11  
12 based regimen, NRTI resistance was reported in 2-91% (data available from 4 countries only) and  
13  
14 INSTI resistance in 0 cases (data available from Zambia only). [17] Cases of 3-class drug resistance  
15  
16 (NRTIs, NNRTIs, and PIs) have been described in Sub-Saharan Africa, with a high prevalence  
17  
18 ( $>20\%$ ) in the setting of virological failure to a second-line PI-containing regimen. [18-20]  
19  
20  
21 Furthermore, resistance to INSTIs has been documented in a high percentage of individuals failing  
22  
23 INSTI-containing regimens, [21] suggesting that 4-class drug resistance might be increasing in low-  
24  
25 income countries.

26  
27  
28  
29  
30 The PRESTIGIO Registry is an Italian open multicenter cohort comprising routinely collected data  
31  
32 and samples in 4DR-PLWH; the cohort is a valuable tool for studying individual characteristics,  
33  
34 including clinical, virological and molecular patterns associated with disease progression. Although  
35  
36 4-class drug resistance might be considered a rare condition in PLWH from high-income countries,  
37  
38 further studies are needed to assess the temporal evolution of this phenomenon, improve the  
39  
40 management of 4DR individuals with a multidisciplinary approach, and evaluate the efficacy of the  
41  
42 newest ART options. Furthermore, results from the PRESTIGIO Registry could be particularly  
43  
44 beneficial for middle- and low-income countries, especially with the widespread use of INSTI-based  
45  
46 regimens, both in the first-line setting and in more advanced lines of therapy. Therefore, this paper  
47  
48 describes the new opportunities in healthcare research emerging from the PRESTIGIO Registry.  
49  
50  
51  
52  
53  
54  
55

## 56 **Cohort description**

## 57 **Study design**

1  
2  
3 The PRESTIGIO Registry is an ongoing Italian, observational, prospective, open-ended, multicenter  
4 cohort collecting biological samples and data on clinical, laboratory, treatment, and virological  
5 characteristics of 4DR-PLWH.  
6  
7

8  
9  
10 The recruitment period started in December 2017 and is still ongoing. From this date, individuals  
11 with 4-class drug resistance are informed about the Registry, after which they can either sign a written  
12 informed consent or opt out. Follow-up accrues from the first evidence of 4-class drug resistance  
13 (baseline) until death, loss to follow-up, or patient's withdrawal of the consent.  
14  
15

16  
17 Plasma and peripheral blood mononuclear cell samples are collected annually for each person,  
18 starting from the date of enrollment, cryopreserved and stored in a biobank (BioRep, [www.biorep.it](http://www.biorep.it)).  
19  
20

21  
22 Clinical, laboratory, treatment, and virological data are annually collected (by the end of January)  
23 since the enrollment; data between the first evidence of 4-class drug resistance and the date of  
24 enrollment and some pre-baseline data are backlogged retrospectively (figure 1). An online electronic  
25 case report form (eCRF) is available and dedicated health staff (within each center) manually inputs  
26 the requested information.  
27  
28  
29  
30  
31  
32  
33

### 34 35 **Registry setting**

36  
37 The PRESTIGIO Registry was established in December 2017; currently, there are 39 participating  
38 Infectious Diseases Clinics, located throughout Italy [23 in Northern, 8 in Central, 4 in Southern Italy,  
39 and 4 in Sicily and Sardinia (figure 2)].  
40  
41  
42  
43

44 The PRESTIGIO Registry is coordinated by the Principal Investigator and a Steering Committee  
45 designed to direct and supervise the research activities. The Steering Committee is composed of  
46 experts in different areas of infectious diseases.  
47  
48  
49

50  
51 The Principal Investigator is responsible for coordinating all the activities of the Registry within the  
52 coordinating and the participating centers. The Steering Committee of the Registry is responsible for:  
53  
54 i) overseeing the monitoring and data quality control procedures; ii) promoting inclusion into the  
55 Registry; iii) further developing the Registry study protocol (e.g., by considering additional  
56 components); iv) making decisions on the collected biosamples in future follow-up visits.  
57  
58  
59  
60

## Study population

The PRESTIGIO Registry includes PLWH who are (1) 18 years or older; (2) harboring a 4DR strain. Four-class drug resistance is defined as intermediate or high-level resistance to at least 1 NRTI, at least 1 NNRTI, at least 1 PI, and at least 1 INSTI, according to the Stanford algorithm (version 9.4.1, hivdb.stanford.edu) and considering cumulative data from all the RNA-based genotypic resistance tests performed for each person. In case of unavailability of any integrase genotype, a documented virological failure (2 consecutive HIV-1 RNA detections  $\geq 50$  copies/mL, or 1 detection  $\geq 1000$  copies/mL) to an INSTI-containing regimen is accepted as an inclusion criterion.

To date (14<sup>th</sup> March 2023), 229 PLWH have been included, of whom 189 (82.5%) are currently in active care, 30 (13.1%) have died and 10 (4.4%) have been lost to follow-up (table 1; table 2; figure 3). At the last available visit, after a median follow-up of 7.7 years, the median age was 58.3 years, 27.5% were women at birth, 91.7% Italian, with HIV-1 infection for a median of 29.8 years. About a quarter (24.5%) stated intravenous drug use as mode of transmission, a quarter (24.5%) were men who have sex with men or bisexual men, and a quarter (23.6%) stated heterosexual mode of transmission. Noteworthy, 9.2% were mother-to-child transmissions. All were on ART (median ART duration 25.8 years), with a >3-drug regimen in 41.5% of cases; INSTIs were contained in 85.2% of the current regimens, PIs in 73.4%, NRTIs in 72.9% and NNRTIs only in 31%. Interestingly, at the last visit, maraviroc was used in 21% of the regimens, fostemsavir in 7.4%, lenacapavir in 3.9%, ibalizumab in 3.1%, and enfuvirtide in 2.6%. Despite 4-class drug resistance, 51.5% of individuals reached and maintained a stable virological suppression (HIV-1 RNA <50 copies/mL for  $\geq 6$  months, without any subsequent failures); at last available visit, HIV-1 RNA was <50 copies/mL in 70.7% of cases, with a median CD4<sup>+</sup> T-cell count of 533 cells/ $\mu$ L.

As what concerns virological aspects, at the last visit 163/176 (92.6%) PLWH harbor a subtype B virus, 90/184 (48.9%) a CCR5-tropic strain (table 2); in particular, among these 90 individuals, tropism different from CCR5 had never been detected in 41.1%. According to cumulative data from genotypic resistance testing (RNA-based, Sanger sequencing method), the most common resistance-



1  
2  
3 associated mutations for each class were M184V for NRTIs [205/229 (89.5%)], K103N for NNRTIs  
4 [121/229 (52.8%)], L90M for PIs [99/229 (43.2%)], and G140S for INSTIs [78/175 (44.6%), of  
5 which 74/78 (94.9%) in combination with Q148H] (online supplementary figure 1). Fifty-four PLWH  
6 did not have an available integrase genotype at the time of virological failure to an INSTI-containing  
7 regimen, because the method was not available at the centers where these individuals were in care;  
8 among them, 75.9% were included in the registry after a virological failure to a raltegravir-containing  
9 regimen, 10.5% to a dolutegravir-containing regimen, and 0.6% to an elvitegravir/cobicistat-  
10 containing regimen.  
11  
12  
13  
14  
15  
16  
17  
18  
19  
20

### 21 **Study objectives**

22  
23 The primary objectives of the PRESTIGIO Registry include: (1) the clinical characterization of the  
24 population with 4DR HIV at baseline; (2) the quantification of incidence and prevalence of acquired  
25 immunodeficiency syndrome (AIDS)- and non-AIDS-defining clinical events; (3) the evaluation of  
26 long-term efficacy of different ART regimens; (4) the evaluation of ART adherence and related  
27 outcomes; (5) the description of 4DR-PLWH in terms of immunological, virological and  
28 inflammatory parameters; (6) the description of genotypic and phenotypic resistance evolution,  
29 especially after new virological failures; (7) the use of new tools to describe the resistance patterns in  
30 4DR-PLWH.  
31  
32  
33  
34  
35  
36  
37  
38  
39  
40  
41

### 42 **Cohort variables and electronic case report form**

43  
44 Variables at baseline include: (1) socio-demographic data (date of birth, sex at birth, country of birth,  
45 ethnicity, employment); (2) lifestyle information (height, weight, smoking habit, alcohol use,  
46 recreational drug use); (3) HIV-related clinical characteristics [mode of HIV transmission, date of  
47 last negative HIV test, date of first positive HIV test, date of ART start, date of highly active ART  
48 start (defined as a combination of drugs from at least 2 classes), date of 4-class drug resistance, all  
49 the available RNA- and deoxyribonucleic acid (DNA)-based genotypic resistance tests (considering  
50 both Sanger sequencing and next-generation sequencing methods, and including data on capsid,  
51 envelope, viral tropism, and/or subtype characterization), CD4<sup>+</sup> lymphocyte nadir with date, HIV-1  
52  
53  
54  
55  
56  
57  
58  
59  
60

1  
2  
3 RNA before ART start, HIV-1 RNA, CD4<sup>+</sup> and CD8<sup>+</sup> T-cell count]; (4) hepatitis B virus and hepatitis  
4 C virus co-infections; (5) complete blood count and blood chemistry examinations [complete blood  
5 cell count, plasma levels of glucose, triglycerides, total/high-density lipoprotein (HDL)-/low-density  
6 lipoprotein (LDL)-cholesterol, creatinine, transaminases, direct and indirect bilirubin]; (6) ongoing  
7 antiretrovirals and concomitant drugs (with starting date, dosages, schedules and routes of  
8 administration); (7) AIDS defining conditions and non-AIDS-related clinical events (including  
9 malignancies of any type, diabetes, arterial hypertension requiring treatment, major adverse  
10 cardiovascular events, chronic liver or kidney diseases, osteoporosis and related fractures,  
11 neurocognitive disorders, chronic obstructive pulmonary disease, etc.); (8) sexually transmitted  
12 infections (STIs).

13  
14  
15 Data collected during follow-up include: (1) an update of hepatitis co-infections; (2) further RNA-  
16 and DNA-based genotypic resistance tests, HIV-1 RNA, CD4<sup>+</sup> and CD8<sup>+</sup> T-cell count  
17 determinations; (3) new complete blood chemistry; (4) modifications in ART or concomitant  
18 therapies (including also date and cause of discontinuation for each drug); (5) vaccinations; (6)  
19 incident AIDS- and non-AIDS-related clinical events with or without hospitalization; (7) incident  
20 STIs (online supplemental table 1).

21  
22  
23 Standard procedures to insert data into an eCRF ([trials-ice2.advicepharma.com/PRESTIGIO/](http://trials-ice2.advicepharma.com/PRESTIGIO/)) have  
24 been defined and the staff dedicated to record information have been trained with specific data  
25 management training courses.

26  
27  
28 Participant data are entered after creating a unique pseudonym for each participant; the pseudonym  
29 is a progressive eight-digit code [center code (3 digits), dash and individual's code (4 digits)]. All the  
30 collected data are managed anonymously.

31  
32  
33 The eCRF access is regulated by a permission-based security methodology that limits access to study  
34 data based on the user ID. Permissions are carefully maintained to allow only the required level of  
35 access to study data. User IDs are required to change password on a regular basis. All eCRF data and  
36 other critical study data are fully audit trail enabled, so that all changes to the data can be monitored

1  
2  
3 and/or recovered, and secured via a decentralized daily backup. Every precaution has been taken to  
4  
5 ensure that computer confidentiality is maintained.  
6

7  
8 All data entered into the eCRF are controlled and verified at multiple levels: the eCRF has several  
9  
10 automated control mechanisms (for example, the time difference between a visit and the date of tests  
11  
12 associated with that visit cannot be >6 months); a Statistical and Monitoring Team verifies the  
13  
14 appropriateness and completeness of the provided information and the data manager of the registry  
15  
16 may request clarifications to the staff responsible for recording information of each center through  
17  
18 queries on the eCRF platform or personal contact; in case of doubt about the validity or completeness  
19  
20 of the recorded virological information, a Virology Team is also involved and queries are made  
21  
22 through the eCRF platform.  
23  
24

25  
26 To date, data monitoring has been performed online, but the PRESTIGIO Registry has planned to  
27  
28 undertake annual on-site monitoring to check source documents and data entry since 2024.  
29

### 30 **Patient and public involvement**

31  
32  
33 Until November 2022, a representative from the community of PLWH was co-opted to the Steering  
34  
35 Committee, together with representatives from the main (those with at least 10 4DR-PLWH)  
36  
37 participating centers of the PRESTIGIO Registry, and was involved in the approval of all the  
38  
39 proposed studies. The inclusion of a new member of the community in the Steering committee has  
40  
41 been foreseen for the next months.  
42  
43  
44  
45

### 46 **Findings from the past 6 years to present**

47  
48  
49 **Studies on clinical and immunological characteristics of 4DR-PLWH.** Considering the high risk  
50  
51 of death and comorbidities in individuals with three-class drug-resistant HIV, [12,22] Galli *et al.*  
52  
53 performed a retrospective cohort study on 148 4DR-PLWH from the PRESTIGIO Registry followed  
54  
55 for a median follow-up of 47 months, to assess the incidence of clinical events and death in this fragile  
56  
57 population. [14] This investigation showed a high burden of disease in 4DR population, with a  
58  
59 markedly increased incidence of AIDS- (2.65/100 person-years-of-follow-up) and non-AIDS-related  
60

1  
2  
3 clinical events (4.71/100 person-years-of-follow-up) and death for any cause (1.76/100 person-years-  
4 of-follow-up); further studies to better characterize the burden of disease in the PRESTIGIO cohort  
5 are ongoing. For example, we recently used retrospective data from the Registry to evaluate the  
6 occurrence of sexually transmitted infections (STIs) in 178 4DR-PLWH and found a non-negligible  
7 incidence of bacterial infections (1.3/100 person-years-of-follow-up in men, 0 in women), together  
8 with the occurrence of viral infections (first diagnosis of genital Herpes Simplex Virus in 3.8% of  
9 men and 2.2% of women, first diagnosis of Human Papilloma Virus in 8.3% of men and 6.5% of  
10 women). [23] Although all bacterial sexually transmitted infections were diagnosed when HIV-1  
11 RNA was <200 copies/mL, these findings highlight the need for strict HIV viremia monitoring,  
12 accurate ART adherence and STI prevention counseling in the population with 4DR HIV.  
13  
14

15  
16  
17 In light of the known association of inflammatory biomarkers with morbidity and mortality in the  
18 general population with HIV, [24-31] we performed a cross-sectional study to evaluate inflammation,  
19 immune activation, microbial translocation, and T-cell exhaustion in 4DR-PLWH. [32] Comparing  
20 age-, sex-, and smoking habit-matched 30 viremic 4DR individuals from the PRESTIGIO Registry,  
21 30 non-viremic 4DR-PLWH from the PRESTIGIO Registry, and 20 non-viremic non-4DR subjects  
22 (from the MODAt study) [33], we found that a higher inflammatory burden was associated with HIV  
23 multidrug resistance, viremia and a previous cancer diagnosis. Furthermore, T cells were more  
24 activated and 'exhausted' in viremic than non-viremic 4DR individuals. These findings stress the  
25 need for further investigations to better characterize immune dysregulation in the 4DR fragile  
26 population and to evaluate new therapeutic approaches with an impact on inflammation, and  
27 potentially morbidity and mortality.  
28  
29

30  
31  
32 **Virological studies on 4DR strains.** Biological samples collected in PRESTIGIO were used to  
33 evaluate the residual susceptibility of 4DR viral strains to some already approved or investigational  
34 antiretroviral drugs. Particularly, Santoro *et al* analyzed 22 samples from 17 4DR-PLWH who  
35 previously failed twice-daily raltegravir-based or twice-daily dolutegravir-based regimens, obtaining  
36 genotypic and phenotypic data, which confirmed that bictegravir and dolutegravir retain activity  
37  
38  
39  
40  
41  
42  
43  
44  
45  
46  
47  
48  
49  
50  
51  
52  
53  
54  
55  
56  
57  
58  
59  
60

1  
2  
3 against most isolates derived from this fragile HTE population. [34] Similarly, Saladini *et al.*  
4 evaluated the phenotypic susceptibility to NNRTIs from 22 viremic 4DR-PLWH from the  
5 PRESTIGIO Registry: doravirine appeared to be a valid option for some 4DR-PLWH and its activity  
6 seemed to be inferred with fair accuracy by the Stanford HIVdb algorithm. [35] As what concerns  
7 molecules with new mechanisms of action, Saladini *et al.* investigated the genotypic and phenotypic  
8 susceptibility to temsavir in a panel of samples collected from 24 4DR individuals (79% previously  
9 exposed to maraviroc or enfuvirtide): temsavir resistance-associated mutations were detected only in  
10 three cases and there was no impact of viral tropism and/or exposure to other entry inhibitors on  
11 fostemsavir susceptibility. [36] Analogously, Rusconi *et al.* analyzed samples from 24 4DR-PLWH,  
12 showing that only 33% harbored a phenotypically CCR5-tropic virus, but in these cases leronlimab  
13 maintained a full activity despite the presence of extensive drug resistance and heavy treatment  
14 experience. [37] In addition, leronlimab susceptibility did not appear to be significantly altered by  
15 previous or current exposure to maraviroc. Similar studies can be performed for other recently  
16 approved or investigational antiretroviral drugs.

17  
18  
19  
20  
21  
22  
23  
24  
25  
26  
27  
28  
29  
30  
31  
32  
33  
34  
35 Finally, the role of next-generation sequencing (NGS) in genotypic drug resistance testing has been  
36 explored. Armenia *et al.* used NGS to evaluate HIV-DNA and HIV-RNA mutational load of drug  
37 resistance and apolipoprotein B messenger RNA editing enzyme catalytic polypeptide (APOBEC)-  
38 related mutations in 20 virologically failing individuals enrolled in the PRESTIGIO Registry. [38]  
39  
40  
41  
42  
43  
44  
45  
46  
47  
48  
49  
50  
51  
52  
53  
54  
55  
56  
57  
58  
59  
60  
The study concluded that using NGS in HIV-DNA and HIV-RNA together with measurement of  
APOBEC editing might help to identify HTE individuals with multidrug resistance who are more  
prone to experience virological failure. Furthermore, in a recently published case of an HTE woman  
from the PRESTIGIO Registry, RNA-based NGS, performed at virological failure, was used to  
exclude the presence of minority resistance-associated mutations and, together with available prior  
genotypic resistance tests, clinical history, and adherence issues, to select an effective antiretroviral  
regimen with a low pill burden. [39] In light of this evidence, the PRESTIGIO Study Group is  
performing further studies on the use of NGS in clinical practice.

1  
2  
3 **Studies on treatment strategies for 4DR-PLWH.** Given the need for optimizing ART in HTE  
4 individuals, Castagna *et al.* performed a retrospective study evaluating the virological efficacy of  
5 dolutegravir 50 mg *bis in die* in 190 virologically failing PLWH with previous exposure to first-  
6 generation INSTIs. [40] The estimated probability of virological failure was limited (17%, 33%, and  
7 52% at 12, 36, and 60 months since baseline, respectively), highlighting a favorable long-term  
8 efficacy of dolutegravir 50 mg twice daily associated with an optimized background regimen in HTE  
9 failing subjects, with an INSTI-resistant virus.

10  
11  
12  
13  
14  
15  
16  
17  
18  
19 Retrospective data from the PRESTIGIO Registry also showed that a small group of 10 4DR-PLWH  
20 who underwent ART simplification with a high genetic barrier 2-drug regimen (containing  
21 darunavir/ritonavir *bis in die* and/or dolutegravir 50 mg *bis in die*), for any reason, was able to  
22 maintain a long-term suppression in 90% of cases. [41] These findings suggest that a high genetic  
23 barrier 2-drug regimen might represent an effective option in carefully selected PLWH with four-  
24 class drug resistance who need simplification. Moreover, in a case report on an 80-year-old HTE man  
25 from the PRESTIGIO Registry, ART was successfully simplified by reducing drug and pill burden  
26 after achievement of virological suppression, thanks to a careful evaluation of cumulative genotypic  
27 resistance testing and drug-drug interactions. [42] Larger studies on the possibility of simplifying  
28 complex regimens in this fragile population are ongoing in the PRESTIGIO cohort.

### 43 44 **Collaborations**

45  
46 Any HIV care provider from a center participating in the PRESTIGIO Registry may propose a project  
47 to the Steering Committee. After approval of the proposal, anonymized data and/or samples from the  
48 Registry will be made available to the study proponent, together with the support of a Statistical and  
49 Monitoring Team.

50  
51  
52  
53  
54  
55  
56 The PRESTIGIO Registry is also available to collaborate with national and international cohorts or  
57 centers with high expertise in specific fields (e.g., virology, immunology, reservoir quantification,  
58 molecular biology, etc.). In particular, given the limited prevalence of HIV 4-class drug resistance in  
59  
60

1  
2  
3 high-income countries, collaboration with other cohorts of individuals with multidrug-resistant viral  
4 strains may help to characterize this population better and to draw more easily generalizable  
5 conclusions. In addition, for many clinical, immunological and virological studies, a control group of  
6 PLWH without 4-class drug resistance but with long HIV infection and ART duration could be useful,  
7 to estimate the effect of multidrug resistance. Finally, in addition to clinical and treatment  
8 characterization, highly specialized studies may be useful not only to better understand the  
9 mechanisms underlying this population's frailty but also to offer innovative and targeted treatment  
10 approaches.  
11  
12  
13  
14  
15  
16  
17  
18  
19  
20  
21  
22

### 23 **Future plans**

24  
25  
26 The PRESTIGIO Registry provides a unique asset to study long-term treatment, comorbidities, and  
27 drug resistance patterns in people with multidrug-resistant HIV in Italy.  
28

29  
30 On one side, 29% of 4DR-PLWH still have unsuppressed viral load, requiring new antiretroviral  
31 treatment options. On the other hand, non-viremic individuals with complex ART regimens require  
32 safe and robust simplification strategies to minimize toxicity and maximize adherence. Furthermore,  
33 attempts are made to conduct virological studies on drug resistance mechanisms and the possibility  
34 of using new tools to predict treatment success. Finally, with our aging fragile cohort, studies on  
35 comorbidities and their underlying molecular mechanisms become more important, especially to  
36 better characterize the disease burden in this population and assess the role of long-term ART  
37 exposure and past or current uncontrolled viral replication. In this sense, also study of quality-of-life  
38 in these fragile individuals could be useful to their correct management. The studies of the Registry  
39 are generally aimed to a better understanding of: a specific health condition, the emergence of  
40 comorbidities, the effect of potential treatments or experimental drugs that may have an impact on  
41 disease progression. The research studies should be also aimed to be inclusive, innovative and in  
42 touch with the communities and society as a whole.  
43  
44  
45  
46  
47  
48  
49  
50  
51  
52  
53  
54  
55  
56  
57  
58  
59  
60

## Strengths and limitations

The main strength of the PRESTIGIO Registry is its unicity: to our knowledge, it is the first cohort that specifically includes 4DR-PLWH. Furthermore, the registry is already available for research projects: clinical centers enrolling 4DR individuals have been linked, patient pathways have been identified, and data have been centralized to enable convenient querying. Accuracy, completeness, and consistency of data from the date of the first evidence of 4-class drug resistance are high, especially for genotypic resistance tests, virological and immunological information, antiretroviral treatment and clinical events. Also, the availability of cryopreserved peripheral blood mononuclear cell (PBMC) and plasma samples collected annually allows to conduct virological and immunological studies to better characterize this population. The multicenter design overcomes the limitations of single center studies on this small population, even though the number of individuals included in the cohort remains limited, due to the rarity of HIV 4-class drug resistance in high-income countries. Some variables are sparsely available in the PRESTIGIO Registry, which currently limits their use for research purposes, but efforts to retrieve this information or obtain it through laboratory analysis (e.g. tropism and subtype) are under way. Furthermore, the vast majority of the cohort was born in Italy and harbors a subtype B viral strain, presumably due to the long duration of HIV infection: most diagnoses could be dated to a period when Italy was considered a B-restricted area. However, it is possible that non-Italian-born individuals and subtype non-B viruses with 4-class drug resistance could be enrolled in the PRESTIGIO Registry in the coming years, following the trend of new diagnoses. [43] Another limitation is the lack of data before the first evidence of 4DR (except for genotypes), although extra information from a limited number of individuals can be easily added by the enrolling centers for specific studies.



## Footnotes

**Collaborators: PRESTIGIO Study Group - STEERING COMMITTEE:** Antonella Castagna (Coordinator; Principal Investigator), Vincenzo Spagnuolo and Laura Galli (Infectious Diseases, IRCCS San Raffaele Scientific Institute, Milan, Italy), Franco Maggiolo (Unit of HIV-related Diseases and Experimental Therapies, Azienda Ospedaliera Papa Giovanni XXIII, Bergamo, Italy), Leonardo Calza (Unit of Infectious Diseases, Department of Medical and Surgical Sciences, S. Orsola Hospital, “Alma Mater Studiorum” University of Bologna, Bologna, Italy), Emanuele Focà (Unit of Infectious and Tropical Diseases, Department of Clinical and Experimental Sciences, ASST Spedali di Brescia, University of Brescia, Brescia, Italy), Filippo Lagi (Infectious and Tropical Diseases Unit, Careggi University Hospital, Florence, Italy), Giovanni Cenderello (Department of Infectious Diseases, Sanremo Hospital, Sanremo, Italy), Antonio Di Biagio (Clinic of Infectious Diseases, IRCCS Policlinico San Martino Hospital, University of Genoa, Genoa, Italy), Giulia Marchetti (Clinic of Infectious Diseases, San Paolo Hospital, ASST Santi Paolo e Carlo, Department of Health Sciences, University of Milan, Italy), Stefano Rusconi (DIBIC, University of Milan, Italy), Adriana Cervo (Infectious Diseases Unit, Policlinico di Modena, Università Degli Studi di Modena e Reggio Emilia, Modena, Italy), Roberta Gagliardini (National Institute for Infectious Diseases “L. Spallanzani” IRCCS, Rome, Italy), Stefano Bonora (Unit of Infectious Diseases, Department of Medical Sciences, University of Turin, Turin, Italy), Anna Maria Cattelan (Infectious Diseases Unit, Department of Molecular Medicine, Padua University Hospital, Padua, Italy), Maurizio Zazzi (Department of Medical Biotechnologies, University of Siena, Siena, Italy), Maria Mercedes Santoro (Department of Experimental Medicine, University of Rome “Tor Vergata”, Rome, Italy).

**VIROLOGY TEAM AND BIOLOGICAL BANK:** Maurizio Zazzi (Department of Medical Biotechnologies, University of Siena, Siena, Italy), Maria Mercedes Santoro (Department of Experimental Medicine, University of Rome “Tor Vergata”, Rome, Italy), Andrea Galli (Infectious Diseases, IRCCS San Raffaele Scientific Institute, Milan, Italy), Francesco Saladini (Department of Medical Biotechnologies, University of Siena, Siena, Italy), Daniele Armenia (Saint Camillus

1  
2  
3 International University of Health Sciences, Rome, Italy). **STUDY COORDINATORS:** Elisabetta  
4 Carini and Sabrina Bagaglio (Infectious Diseases, IRCCS San Raffaele Scientific Institute, Milan,  
5 Italy). **STATISTICAL AND MONITORING TEAM:** Laura Galli, Riccardo Lolatto and Sara  
6 Diotallevi (Infectious Diseases, IRCCS San Raffaele Scientific Institute, Milan, Italy).  
7  
8 **PARTICIPATING CENTERS:** ANCONA (Gastroenterological and Transplant Department,  
9 S.O.D. Malattie Infettive Emergenti e degli Immunodepressi, University Hospital "Ospedali Riuniti",  
10 Ancona, Italy): Marcello Tavio and Alessandra Mataloni Paggi; AVIANO (Centro di riferimento  
11 oncologico, Aviano, Italy): Ferdinando Martellotta; BAGNO A RIPOLI (Infectious Diseases Unit,  
12 Santa Maria Annunziata Hospital, Bagno a Ripoli, Italy): Francesca Vichi, Alessio Bellucci, Elisa  
13 Mirabelli; BARI (Operative Unit of Infectious Diseases, Hospital-University Polyclinic of Bari, Bari,  
14 Italy): Annalisa Saracino and Flavia Balena; BERGAMO (Unit of HIV-related Diseases and  
15 Experimental Therapies, Azienda Ospedaliera Papa Giovanni XXIII, Bergamo, Italy): Franco  
16 Maggiolo, Laura Comi, Daniela Valenti, and Claudia Suardi; BOLOGNA (Unit of Infectious  
17 Diseases, Department of Medical and Surgical Sciences, S. Orsola Hospital, "Alma Mater  
18 Studiorum" University of Bologna, Bologna, Italy): Leonardo Calza and Federica Malerba;  
19 BRESCIA (Unit of Infectious and Tropical Diseases, Department of Clinical and Experimental  
20 Sciences, ASST Spedali di Brescia, University of Brescia, Brescia, Italy): Francesco Castelli,  
21 Emanuele Focà, Davide Minisci, Francesca Pennati, Anna Celotti, and Francesca Brognoli; BUSTO  
22 ARSTIZIO (Unit of Infectious Diseases, ASST della Valle Olona, Busto Arsizio Hospital, Busto  
23 Arsizio, Italy): Barbara Menzaghi and Maddalena Farinazzo; CAGLIARI (Immunology Unit,  
24 Department of Internal Medicine, University Hospital of Cagliari, Cagliari, Italy): Francesco Ortu;  
25 (Infectious Diseases Unit, SS Trinità Hospital, ASSL Cagliari, Italy): Marco Campus; CATANIA  
26 (Unit of Infectious Diseases, Garibaldi Hospital, Catania, Italy): Bruno Cacopardo, Benedetto  
27 Maurizio Celesia, Michele Salvatore Paternò Raddusa, and Carmen Giarratana; CATANZARO  
28 (Infectious and Tropical Disease Unit, Department of Medical and Surgical Sciences, "Magna  
29 Graecia" University of Catanzaro, Catanzaro, Italy): Carlo Torti, Paolo Fusco, and Gabriele Bruno;  
30  
31  
32  
33  
34  
35  
36  
37  
38  
39  
40  
41  
42  
43  
44  
45  
46  
47  
48  
49  
50  
51  
52  
53  
54  
55  
56  
57  
58  
59  
60

1  
2  
3 CREMONA (Unità di Malattie Infettive, ASST di Cremona, Cremona, Italy): Angelo Pan, Paola  
4 Brambilla, and Chiara Fornabaio; FIRENZE (Infectious and Tropical Diseases Unit, Careggi  
5 University Hospital, Florence, Italy): Alessandro Bartoloni, Paola Corsi, Seble Tekle Kiros, Filippo  
6 Lagi, and Filippo Ducci; FOGGIA (Clinic of Infectious Diseases, Department of Clinical and  
7 Experimental Medicine, University of Foggia, Foggia, Italy): Teresa Santantonio, Sergio Lo Caputo,  
8 Sergio Ferrara, and Marianna Narducci; GENOVA (Infectious Disease Unit, Galliera Hospital,  
9 Genoa, Italy): Emanuele Pontali, Marcello Feasi, and Antonio Sarà; (Clinic of Infectious Diseases,  
10 IRCCS Policlinico San Martino Hospital, University of Genoa, Genoa, Italy): Matteo Bassetti,  
11 Antonio Di Biagio, and Sabrina Blanchi; LA SPEZIA (Infectious Diseases and Hepatology Unit,  
12 Sant'Andrea Hospital La Spezia, La Spezia, Italy): Stefania Artioli and Michele Guerra; MILANO  
13 (Infectious Diseases, IRCCS San Raffaele Scientific Institute, Milan, Italy): Antonella Castagna,  
14 Vincenzo Spagnuolo, Elisabetta Carini, Sabrina Bagaglio, Laura Galli, Riccardo Lolatto, Andrea  
15 Galli, Tommaso Clemente, Rebecka Papaioannu Borjesson, and Sara Diotallevi; (III Division of  
16 Infectious Diseases, ASST Fatebenefratelli Sacco, Luigi Sacco Hospital, Milano, Italy): Spinello  
17 Antinori, Tiziana Formenti, and Andrea Giacomelli; (Clinic of Infectious Diseases, San Paolo  
18 Hospital, ASST Santi Paolo e Carlo, Department of Health Sciences, University of Milan, Italy):  
19 Giulia Marchetti, Lidia Gazzola, and Federica De Flaviis; (Division of Infectious Diseases, ASST  
20 Grande Ospedale Metropolitano Niguarda, Milano, Italy): Massimo Puoti, Cristina Moioli, and  
21 Federico D'Amico; (Infectious Diseases Unit, Department of Internal Medicine, Fondazione IRCCS  
22 Ca' Granda Ospedale Maggiore Policlinico, Milan, Italy): Alessandra Bandera and Valentina Ferroni;  
23 MODENA (Infectious Diseases Unit, Policlinico di Modena, Università Degli Studi di Modena e  
24 Reggio Emilia, Modena, Italy): Cristina Mussini, Adriana Cervo, Roncaglia Enrica, Nardini Giulia,  
25 and Barbara Beghetto; NAPOLI (VIII Infectious Disease Unit, AORN dei Coli, PO Cotugno, Naples,  
26 Italy): Elio Manzillo and Amedeo Lanzardo; PADOVA (Infectious Diseases Unit, Department of  
27 Molecular Medicine, Padua University Hospital, Padua, Italy): Anna Maria Cattelan and Maria  
28 Mazzitelli; PALERMO (Infectious and Tropical Disease Unit, Sicilian Regional Reference Center

1  
2  
3 for the Fight against AIDS, AOU Policlinico "P. Giaccone", Palermo, Italy): Antonio Cascio and  
4  
5 Marcello Trizzino; PARMA (Unit of Infectious Diseases, AO-Universitaria, Parma, Italy): Elisa  
6  
7 Fronti and Diletta Laccabue; PAVIA (Division of Infectious Diseases, Fondazione IRCCS Policlinico  
8  
9 San Matteo, Pavia, Italy): Roberto Gulminetti and Andrea Zuccarini; PERUGIA (Infectious Diseases  
10  
11 Clinic, University Hospital "S. Maria della Misericordia", University of Perugia, Perugia, Italy):  
12  
13 Daniela Francisci, Elisabetta Schiaroli, and Giuseppe De Socio; REGGIO EMILIA (Malattie  
14  
15 Infettive Arcispedale S. Maria Nuova-IRCSS, Reggio Emilia, Italy): Elisa Garlassi and Romina  
16  
17 Corsini; ROMA (National Institute for Infectious Diseases "L. Spallanzani" IRCCS, Rome, Italy):  
18  
19 Roberta Gagliardini, Marisa Fusto and Andrea Antinori; (Infectious Disease Clinic, Tor Vergata  
20  
21 University Hospital PTV, Rome, Italy): Loredana Sarmati, Vincenzo Malagnino; (UOC Malattie  
22  
23 Infettive, Infectious Disease Department, Fondazione Policlinico Universitario Agostino Gemelli  
24  
25 IRCCS, Rome, Italy): Silvia Lamonica, Simona Di Giambenedetto, and Tiziana Mulas; SANREMO  
26  
27 (Department of Infectious Diseases, Sanremo Hospital, Sanremo, Italy): Giovanni Cenderello and  
28  
29 Rachele Pincino; SIENA (Department of Medical Sciences, Infectious and Tropical Diseases Unit,  
30  
31 University Hospital of Siena, Siena, Italy): Mario Tumbarello, Massimiliano Fabbiani, Francesca  
32  
33 Panza, and Ilaria Rancan; TORINO (Unit of Infectious Diseases, Department of Medical Sciences,  
34  
35 University of Turin, Turin, Italy): Giovanni Di Perri, Stefano Bonora, Micol Ferrara, and Silvia  
36  
37 Fantino; TRIESTE (Infectious Diseases Unit, Trieste University Hospital ASUGI, Trieste, Italy):  
38  
39 Roberto Luzzati and Andrea Misin; VERONA (UOS Malattie Infettive dell'Azienda Scaligera di  
40  
41 Verona, Verona, Italy): Marina Malena and Marta Fiscon.

42  
43 **Contributors:** AnCa, LG, VS, and TC planned and designed the cohort profile description. LG and  
44  
45 RL performed statistical analysis. TC, LG and VS drafted the manuscript. RL, RG, FL, MF, AMC,  
46  
47 EF, ADB, AdCe, LC, FM, GM, GC, SR, MZ, MMS, and AnCa revised the manuscript and approved  
48  
49 the final version. TC, LG, VS, and AnCa, as guarantors, accepts full responsibility of the work, had  
50  
51 access to the data, and controlled the decision to publish.  
52  
53  
54  
55  
56  
57  
58  
59  
60

1  
2  
3 **Funding:** The authors have not declared a specific grant for this research from any funding agency  
4  
5 in the public, commercial or not-for-profit sectors. PRESTIGIO Registry received funding from  
6  
7 Gilead Sciences, ViiV Healthcare, Merck Sharp & Dohme, and Theratechnologies.  
8  
9

10 **Competing interests:** RG reports payments to her institution from Gilead Sciences, personal fees for  
11  
12 speaker panels and educational material from ViiV Healthcare, Merck Sharp and Dohme, and Gilead  
13  
14 Sciences, advisory boards from Theratechnologies, Janssen-Cilag, and Gilead Sciences. FL reports  
15  
16 personal fees for speaker panels from ViiV Healthcare, Janssen-Cilag, and Merck Sharp and Dohme,  
17  
18 travel grants from Gilead Sciences, ViiV Healthcare, and Janssen-Cilag, advisory boards from ViiV  
19  
20 Healthcare and Janssen-Cilag. EF reports personal fees for consultancy from Merck Sharp and  
21  
22 Dohme, ViiV Healthcare, Gilead Sciences, and Swedish Orphan Biovitrum, speaker panels and  
23  
24 educational material from ViiV Healthcare and Gilead Sciences, advisory boards from ViiV  
25  
26 Healthcare, Gilead Sciences, and Merck Sharp and Dohme. ADB reports personal fees for speaker  
27  
28 panels and educational material from ViiV Healthcare and Gilead Sciences, travel grants from ViiV  
29  
30 Healthcare. AdCe reports personal fees for speaker panels from ViiV Healthcare. FM reports personal  
31  
32 fees for consultancy and advisory boards from Merck Sharp and Dohme, ViiV Healthcare, and Gilead  
33  
34 Sciences. GM reports personal fees for speaker panels and educational material from Gilead Sciences,  
35  
36 travel grants from Janssen-Cilag, Gilead Sciences, and ViiV Healthcare, advisory boards from Gilead  
37  
38 Sciences, ViiV Healthcare, and Angelini Pharma. GC reports personal fees for speaker panels and  
39  
40 educational material from Gilead Sciences, ViiV Healthcare, and AbbVie, travel grants from Gilead  
41  
42 Sciences. SR reports payments to his institution from Gilead Sciences, Janssen-Cilag, and ViiV  
43  
44 Healthcare, personal fees for travel grants from Gilead Sciences, Janssen-Cilag, and ViiV Healthcare,  
45  
46 advisory boards from Gilead Sciences, Janssen-Cilag, ViiV Healthcare, and Merck Sharp and Dohme.  
47  
48 MZ reports personal fees for consultancy, speaker panels and educational material from Gilead  
49  
50 Sciences, ViiV Healthcare, and Merck Sharp and Dohme. MMS reports personal fees for speaker  
51  
52 panels and educational material from ViiV Healthcare, Merck Sharp and Dohme, and Janssen-Cilag,  
53  
54 advisory boards from ViiV Healthcare and Theratechnologies. VS reports grants from Gilead Sciences,  
55  
56  
57  
58  
59  
60

1  
2  
3 personal fees for speaker panels from Gilead Sciences, ViiV Healthcare, and Merck Sharp & Dohme.

4  
5 AnCa reports personal fees for advisory boards, speaker panels and educational materials from Gilead  
6  
7 Sciences, ViiV Healthcare, Janssen-Cilag, Merck Sharp & Dohme, and Theratechnologies. All other  
8  
9 authors: no potential conflicts.

10  
11  
12 **Patient and public involvement:** Patients and/or the public were involved in the design, or conduct,  
13  
14 or reporting, or dissemination plans of this research. Refer to the Cohort description section for further  
15  
16 details.

17  
18  
19 **Provenance and peer review:** Not commissioned; externally peer reviewed.

### 20 21 22 23 **Data availability statement**

24  
25  
26 Data can be made available upon reasonable request.

### 27 28 29 30 **Ethics statements**

#### 31 32 **Patient consent for publication**

33  
34  
35 Not applicable.

#### 36 37 **Ethics approval**

38  
39  
40 The PRESTIGIO Registry was approved by the Ethic Committee of the coordinating center (IRCCS  
41  
42 San Raffaele Scientific Institute, Milan, Italy, protocol number 41/int/December 2017) and by the  
43  
44 Ethic Committees of all the participating Centers (University Hospital "Ospedali Riuniti", Ancona,  
45  
46 Italy; Centro di riferimento oncologico, Aviano, Italy; Santa Maria Annunziata Hospital, Bagno a  
47  
48 Ripoli, Italy; Hospital-University Polyclinic of Bari, Bari, Italy; Azienda Ospedaliera Papa Giovanni  
49  
50 XXIII, Bergamo, Italy; S. Orsola Hospital, Bologna, Italy; Azienda Ospedaliera Spedali Civili di  
51  
52 Brescia, Brescia, Italy; ASST della Valle Olona, Busto Arsizio Hospital, Busto Arsizio, Italy;  
53  
54 University Hospital of Cagliari, Cagliari, Italy; SS Trinità Hospital, ASSL Cagliari, Italy; Garibaldi  
55  
56 Hospital, Catania, Italy; AOU Mater Domini, Catanzaro, Italy; ASST di Cremona, Cremona, Italy;  
57  
58 Careggi University Hospital, Florence, Italy; Plesso Colonnello D'Avanzo, Foggia, Italy; Galliera  
59  
60

1  
2  
3 Hospital, Genoa, Italy; IRCCS Policlinico San Martino Hospital, Genoa, Italy; Sant'Andrea Hospital  
4  
5 La Spezia, La Spezia, Italy; ASST Fatebenefratelli Sacco, Luigi Sacco Hospital, Milan, Italy; San  
6  
7 Paolo Hospital, ASST Santi Paolo e Carlo, Milan, Italy; ASST Grande Ospedale Metropolitano  
8  
9 Niguarda, Milan, Italy; IRCCS Ca' Granda Ospedale Maggiore Policlinico, Milan, Italy; Azienda  
10  
11 Ospedaliero-Universitaria di Modena, Modena, Italy; AORN dei Coli, PO Cotugno, Naples, Italy;  
12  
13 Padua University Hospital, Padua, Italy; AOU Policlinico "P. Giaccone", Palermo, Italy; AO-  
14  
15 Universitaria, Parma, Italy; Fondazione IRCCS Policlinico San Matteo, Pavia, Italy; University  
16  
17 Hospital "S. Maria della Misericordia", Perugia, Italy; Arcispedale S. Maria Nuova-IRCSS, Reggio  
18  
19 Emilia, Italy; National Institute for Infectious Diseases "L. Spallanzani" IRCCS, Rome, Italy; Tor  
20  
21 Vergata University Hospital PTV, Rome, Italy; Fondazione Policlinico Universitario Agostino  
22  
23 Gemelli IRCCS, Rome, Italy; Sanremo Hospital, Sanremo, Italy; University Hospital of Siena, Siena,  
24  
25 Italy; Amedeo di Savoia Hospital, Turin, Italy; Trieste University Hospital ASUGI, Trieste, Italy;  
26  
27 AULSS9 Azienda Scaligera di Verona, Verona, Italy).  
28  
29  
30  
31  
32  
33  
34  
35  
36  
37  
38  
39  
40  
41  
42  
43  
44  
45  
46  
47  
48  
49  
50  
51  
52  
53  
54  
55  
56  
57  
58  
59  
60

## References

- 1 Smith CJ, Ryom L, Weber R, *et al.* Trends in underlying causes of death in people with HIV from 1999 to 2011 (D:A:D): a multicohort collaboration. *Lancet* 2014;384:241-8.
- 2 Legarth RA, Ahlström MG, Kronborg G *et al.* Long-Term Mortality in HIV-Infected Individuals 50 Years or Older: A Nationwide, Population-Based Cohort Study. *J Acquir Immune Defic Syndr* 2016;71:213-8.
- 3 Antiretroviral Therapy Cohort Collaboration. Survival of HIV-positive patients starting antiretroviral therapy between 1996 and 2013: a collaborative analysis of cohort studies. *Lancet HIV* 2017;4:e349-56.
- 4 Marcus JL, Leyden WA, Alexeeff SE, *et al.* Comparison of Overall and Comorbidity-Free Life Expectancy Between Insured Adults With and Without HIV Infection, 2000-2016. *JAMA Netw Open* 2020;3:e207954.
- 5 Wandeler G, Johnson LF, Egger M. Trends in life expectancy of HIV-positive adults on antiretroviral therapy across the globe: comparisons with general population. *Curr Opin HIV AIDS* 2016 Sep;11:492-500.
- 6 Armenia D, Di Carlo D, Flandre P, *et al.* HIV MDR is still a relevant issue despite its dramatic drop over the years. *J Antimicrob Chemother* 2020;75:1301-10.
- 7 Cutrell J, Jodlowski T, Bedimo R. The management of treatment-experienced HIV patients (including virologic failure and switches). *Ther Adv Infect Dis* 2020;7:2049936120901395.
- 8 Priest J, Hulbert E, Gilliam BL, *et al.* Characterization of Heavily Treatment-Experienced People With HIV and Impact on Health Care Resource Utilization in US Commercial and Medicare Advantage Health Plans. *Open Forum Infect Dis* 2021;8:ofab562.
- 9 Pelchen-Matthews A, Borges ÁH, Reekie J, *et al.* Prevalence and Outcomes for Heavily Treatment-Experienced Individuals Living With Human Immunodeficiency Virus in a European Cohort. *J Acquir Immune Defic Syndr* 2021;87:806-17.



- 1  
2  
3 10 Pelchen-Matthews A, Ryom L, Borges ÁH, *et al.* Aging and the evolution of comorbidities among  
4 HIV-positive individuals in a European cohort. *AIDS* 2018;32:2405-16.  
5  
6  
7  
8 11 Enriquez M, McKinsey DS. Strategies to improve HIV treatment adherence in developed  
9 countries: clinical management at the individual level. *HIV AIDS (Auckl)* 2011;3:45-51.  
10  
11  
12 12 Zaccarelli M, Tozzi V, Lorenzini P, *et al.* Multiple drug class-wide resistance associated with  
13 poorer survival after treatment failure in a cohort of HIV-infected patients. *AIDS* 2005;19:1081-9.  
14  
15  
16 13 Spivack S, Pagkalinawan S, Samuel R, *et al.* HIV: how to manage heavily treatment-experienced  
17 patients. *Drugs Context* 2022;11:2021-9-1.  
18  
19  
20 14 Galli L, Parisi MR, Poli A, *et al.* Burden of Disease in PWH Harboring a Multidrug-Resistant  
21 Virus: Data From the PRESTIGIO Registry. *Open Forum Infect Dis* 2020;7:ofaa456.  
22  
23  
24 15 Davy-Mendez T, Eron JJ, Brunet L, *et al.* New antiretroviral agent use affects prevalence of HIV  
25 drug resistance in clinical care populations. *AIDS* 2018;32:2593-603.  
26  
27  
28 16 Lombardi F, Giacomelli A, Armenia D, *et al.* Prevalence and factors associated with HIV-1 multi-  
29 drug resistance over the past two decades in the Italian ARCA database. *Int J Antimicrob Agents*  
30 2021;57:106252.  
31  
32  
33 17 World Health Organization. HIV drug resistance report 2021.  
34 <https://www.who.int/publications/i/item/9789240038608>; 2021 [accessed 31 July 2023].  
35  
36  
37 18 Barabona G, Mahiti M, Masoud S, *et al.* Pre-treatment and acquired HIV drug resistance in Dar  
38 es Salaam, Tanzania in the era of tenofovir and routine viral load monitoring. *J Antimicrob*  
39 *Chemother* 2019;74:3016-20.  
40  
41  
42 19 von Braun A, Sekaggya-Wiltshire C, Bachmann N, *et al.* HIV-1 Drug Resistance Among Ugandan  
43 Adults Attending an Urban Out-Patient Clinic. *J Acquir Immune Defic Syndr* 2018;78:566-73.  
44  
45  
46 20 Inzaule SC, Hamers RL, Mukui I, *et al.* Emergence of untreatable, multidrug-resistant HIV-1 in  
47 patients failing second-line therapy in Kenya. *AIDS* 2017;31:1495-8.  
48  
49  
50  
51  
52  
53  
54  
55  
56  
57  
58  
59  
60

- 1  
2  
3 21 Ngoufack Jagni Semengue E, Santoro MM, Ndze VN, *et al.* HIV-1 integrase resistance associated  
4 mutations and the use of dolutegravir in Sub-Saharan Africa: A systematic review and meta-analysis.  
5  
6 *PLOS Glob Public Health* 2022;2:e0000826.  
7  
8  
9  
10 22 Pursuing Later Treatment Option II (PLATO II) project team; Observational HIV Epidemiological  
11 Research Europe (COHERE) Group; Costagliola D, *et al.* Trends in virological and clinical outcomes  
12 in individuals with HIV-1 infection and virological failure of drugs from three antiretroviral drug  
13 classes: a cohort study. *Lancet Infect Dis* 2012;12:119-27.  
14  
15  
16  
17  
18 23 Clemente T, Lolatto R, Papaioannu Borjesson R, *et al.* Sexually transmitted infections in people  
19 with multidrug-resistant HIV. *AIDS* 2023;37:2425-30.  
20  
21  
22  
23 24 Hunt PW, Lee SA, Siedner MJ. Immunologic Biomarkers, Morbidity, and Mortality in Treated  
24 HIV Infection. *J Infect Dis* 2016;214 Suppl 2:S44-50.  
25  
26  
27  
28 25 Erlandson KM, Allshouse AA, Jankowski CM, *et al.* Association of functional impairment with  
29 inflammation and immune activation in HIV type 1-infected adults receiving effective antiretroviral  
30 therapy. *J Infect Dis* 2013;208:249-59.  
31  
32  
33  
34 26 Mooney S, Tracy R, Osler T, *et al.* Elevated Biomarkers of Inflammation and Coagulation in  
35 Patients with HIV Are Associated with Higher Framingham and VACS Risk Index Scores. *PLoS One*  
36 2015;10:e0144312.  
37  
38  
39  
40 27 Montoya JL, Campbell LM, Paolillo EW, *et al.* Inflammation Relates to Poorer Complex Motor  
41 Performance Among Adults Living With HIV on Suppressive Antiretroviral Therapy. *J Acquir*  
42 *Immune Defic Syndr* 2019;80:15-23.  
43  
44  
45  
46 28 Kuller LH, Tracy R, Belloso W, *et al.* Inflammatory and coagulation biomarkers and mortality in  
47 patients with HIV infection. *PLoS Med* 2008;5:e203.  
48  
49  
50  
51 29 Hunt PW, Sinclair E, Rodriguez B, *et al.* Gut epithelial barrier dysfunction and innate immune  
52 activation predict mortality in treated HIV infection. *J Infect Dis* 2014;210:1228-38.  
53  
54  
55  
56  
57  
58  
59  
60

- 1  
2  
3 30 So-Armah KA, Tate JP, Chang CH, *et al.* Do Biomarkers of Inflammation, Monocyte Activation,  
4 and Altered Coagulation Explain Excess Mortality Between HIV Infected and Uninfected People? *J*  
5 *Acquir Immune Defic Syndr* 2016;72:206-13.  
6  
7  
8  
9  
10 31 Freiberg MS, Bebu I, Tracy R, *et al.* D-Dimer Levels before HIV Seroconversion Remain Elevated  
11 Even after Viral Suppression and Are Associated with an Increased Risk of Non-AIDS Events. *PLoS*  
12 *One* 2016;11:e0152588.  
13  
14  
15  
16  
17 32 Clemente T, Caccia R, Galli L, *et al.* Inflammation burden score in multidrug-resistant HIV-1  
18 infection. *J Infect* 2023;86:453-61.  
19  
20  
21  
22 33 Castagna A, Spagnuolo V, Galli L, *et al.* Simplification to atazanavir/ritonavir monotherapy for  
23 HIV-1 treated individuals on virological suppression: 48-week efficacy and safety results. *AIDS*  
24 2014;28:2269-79.  
25  
26  
27  
28 34 Santoro MM, Fornabaio C, Malena M, *et al.* Susceptibility to HIV-1 integrase strand transfer  
29 inhibitors (INSTIs) in highly treatment-experienced patients who failed an INSTI-based regimen. *Int*  
30 *J Antimicrob Agents* 2020;56:106027.  
31  
32  
33  
34  
35 35 Saladini F, Giammarino F, Maggiolo F, *et al.* Residual phenotypic susceptibility to doravirine in  
36 multidrug-resistant HIV-1 from subjects enrolled in the PRESTIGIO Registry. *Int J Antimicrob*  
37 *Agents* 2023;61:106737.  
38  
39  
40  
41  
42 36 Saladini F, Giannini A, Giammarino F, *et al.* In vitro susceptibility to fostemsavir is not affected  
43 by long-term exposure to antiviral therapy in MDR HIV-1-infected patients. *J Antimicrob Chemother*  
44 2020;75:2547-53.  
45  
46  
47  
48  
49 37 Rusconi S, Saladini F, Bellocchi MC, *et al.* Leronlimab (PRO 140) in vitro activity against 4-class  
50 drug resistant HIV-1 from heavily treatment experienced subjects. *Pharmacol Res* 2022;176:106064.  
51  
52  
53  
54 38 Armenia D, Santoro MM, Bellocchi MC, *et al.* Viral resistance burden and APOBEC editing  
55 correlate with virological response in heavily treatment-experienced people living with multi-drug  
56 resistant HIV. *Int J Antimicrob Agents* 2022;59:106492.  
57  
58  
59  
60

- 1  
2  
3 39 Labate L, Bruzzone B, Spagnuolo V, *et al.* PRESTIGIO RING: “A 59-year-old HIV-1 positive,  
4 highly treatment-experienced woman failing darunavir/ ritonavir plus raltegravir”. *New Microbiol*  
5  
6 2023;46:226-30.  
7  
8  
9  
10 40 Castagna A, Ferrara M, Galli L, *et al.* Long-term efficacy of dolutegravir in treatment-experienced  
11 subjects failing therapy with HIV-1 integrase strand inhibitor-resistant virus. *J Antimicrob Chemother*  
12  
13 2018;73:177-82.  
14  
15  
16  
17 41 Canetti D, Galli L, Gianotti N, *et al.* Simplification to High Genetic Barrier 2-Drug Regimens in  
18 People Living With HIV Harboring 4-Class Resistance Enrolled in the PRESTIGIO Registry. *J*  
19  
20  
21  
22 *Acquir Immune Defic Syndr* 2020;84:e24-8.  
23  
24 42 Mazzitelli M, Zazzi M, Marchetti G, *et al.* PRESTIGIO RING: “An 80-year-old man living with  
25 HIV resistant to all four antiretroviral classes and desiring treatment simplification”. *New Microbiol*  
26  
27 2023 (in press).  
28  
29  
30 43 Rossetti B, Di Giambenedetto S, Torti C, *et al.* Evolution of transmitted HIV-1 drug resistance  
31 and viral subtypes circulation in Italy from 2006 to 2016. *HIV Med.* 2018;19:619-28.  
32  
33  
34  
35  
36  
37  
38  
39  
40  
41  
42  
43  
44  
45  
46  
47  
48  
49  
50  
51  
52  
53  
54  
55  
56  
57  
58  
59  
60

**Table 1. Demographic, socio-economic and lifestyle description of the PRESTIGIO Registry at last available visit (freezing date: 14<sup>th</sup> March 2023)**

| <b>Characteristics</b> | <b>Overall (n=229)</b> |             |
|------------------------|------------------------|-------------|
| Age (years)            | 58.3 (53.6 – 61.6)     |             |
| Gender at birth        |                        |             |
|                        | Female                 | 63 (27.5%)  |
|                        | Male                   | 166 (72.5%) |
| Birth region           |                        |             |
|                        | Italy                  | 210 (91.7%) |
|                        | Europe except Italy    | 8 (3.5%)    |
|                        | Africa                 | 8 (3.4%)    |
|                        | South America          | 2 (0.9%)    |
|                        | Asia                   | 1 (0.4%)    |
| Ethnicity              |                        |             |
|                        | Caucasian              | 218 (95.2%) |
|                        | Black                  | 9 (3.9%)    |
|                        | Hispanic               | 2 (0.9%)    |
| Smoking habit          |                        |             |
|                        | Yes                    | 92 (40.2%)  |
|                        | No                     | 58 (25.3%)  |
|                        | Previous               | 38 (16.6%)  |

|                                     |                             |            |
|-------------------------------------|-----------------------------|------------|
|                                     | Unknown                     | 41 (17.9%) |
| Reason for not being in active care |                             |            |
|                                     | Dead                        | 30 (13.1%) |
|                                     | Emigrated/Lost to follow-up | 10 (4.4%)  |

Data reported as frequency (percentage) or median (interquartile range), as appropriate.

**Table 2. Virological, immunological and treatment description of the PRESTIGIO Registry at the last available visit (freezing date: 14<sup>th</sup> March 2023)**

| Characteristics                                                              | Overall (n=229)    |
|------------------------------------------------------------------------------|--------------------|
| Mode of HIV transmission                                                     |                    |
| Heterosexual                                                                 | 54 (23.6%)         |
| Men who have sex with men/Bisexual                                           | 56 (24.5%)         |
| Intravenous drug use                                                         | 56 (24.5%)         |
| Mother to child                                                              | 21 (9.2%)          |
| Unknown/Other                                                                | 42 (18.3%)         |
| Years since HIV diagnosis                                                    | 29.8 (25.3 – 33.7) |
| Years since evidence of 4-class drug resistance (follow-up duration)         | 7.7 (4.8 - 10.2)   |
| HIV-1 RNA (copies/mL)                                                        |                    |
| <50                                                                          | 162 (70.7%)        |
| 50 – 199                                                                     | 28 (12.2%)         |
| 200 – 999                                                                    | 14 (6.1%)          |
| ≥1000                                                                        | 25 (10.9%)         |
| HIV-1 RNA <50 copies/mL for ≥6 months without subsequent virological failure | 118 (51.5%)        |
| CD4 <sup>+</sup> T-cell count (cells/μL)                                     | 533 (330.5 – 794)  |
| CD4 <sup>+</sup> T-cell count (cells/μL)                                     |                    |
| <200                                                                         | 33 (14.4%)         |
| 200 – 349                                                                    | 31 (13.5%)         |

|                                               |                               |                      |
|-----------------------------------------------|-------------------------------|----------------------|
|                                               | 350 – 499                     | 43 (18.8%)           |
|                                               | ≥500                          | 122 (53.3%)          |
| CD8 <sup>+</sup> T-cell count (cells/μL)      |                               | 892.5 (664.5 - 1260) |
| CD4 <sup>+</sup> /CD8 <sup>+</sup> ratio      |                               | 0.63 (0.33 - 0.90)   |
| CD4 <sup>+</sup> nadir (cells/μL)             |                               | 82 (17 - 183)        |
| HIV-1 subtype                                 |                               |                      |
|                                               | B                             | 163 (71.2%)          |
|                                               | C                             | 1 (0.4%)             |
|                                               | F                             | 4 (1.7%)             |
|                                               | G                             | 1 (0.4%)             |
|                                               | Circulating recombinant forms | 7 (3.1%)             |
|                                               | Missing                       | 53 (23.1%)           |
| Tropism                                       |                               |                      |
|                                               | CCR5-tropic                   | 90 (39.3%)           |
|                                               | CXCR4-tropic or dual mixed    | 94 (41.0%)           |
|                                               | Missing                       | 45 (19.7%)           |
| CCR-5 tropism detected in all tests performed |                               | 37 (16.2%)           |
| On ART                                        |                               | 229 (100%)           |
| ART duration (years)                          |                               | 25.8 (21.9 – 28.8)   |
| Calendar year of ART start                    |                               |                      |



|                                                  |       |             |
|--------------------------------------------------|-------|-------------|
|                                                  | <1998 | 148 (64.6%) |
|                                                  | ≥1998 | 81 (35.4%)  |
| Number of antiretrovirals in the current regimen |       |             |
|                                                  | ≤3    | 134 (58.5%) |
|                                                  | 4 - 5 | 89 (38.9%)  |
|                                                  | 6 - 7 | 6 (2.6%)    |
| NRTI-containing regimens                         |       | 167 (72.9%) |
| NNRTI-containing regimens                        |       | 71 (31%)    |
| PI-containing regimens                           |       | 168 (73.4%) |
| INSTI-containing regimens                        |       | 195 (85.2%) |
| Maraviroc-containing regimens                    |       | 48 (21%)    |
| Enfuvirtide-containing regimens                  |       | 6 (2.6%)    |
| Fostemsavir-containing regimens                  |       | 17 (7.4%)   |
| Ibalizumab-containing regimens                   |       | 7 (3.1%)    |
| Lenacapavir-containing regimens                  |       | 9 (3.9%)    |

Data reported as frequency (percentage) or median (interquartile range), as appropriate. ART: antiretroviral therapy; HIV: human immunodeficiency virus; INSTI: integrase strand transfer inhibitor; NNRTI: non-nucleoside reverse transcriptase inhibitors; NRTI: nucleoside reverse transcriptase inhibitor; PI: protease inhibitor.

1  
2  
3  
4  
5  
6  
7  
8  
9  
10  
11  
12  
13  
14  
15  
16  
17  
18  
19  
20  
21  
22  
23  
24  
25  
26  
27  
28  
29  
30  
31  
32  
33  
34  
35  
36  
37  
38  
39  
40  
41  
42  
43  
44  
45  
46  
47  
48  
49  
50  
51  
52  
53  
54  
55  
56  
57  
58  
59  
60

**Figure captions.**

**Figure 1.** PRESTIGIO timeline. Genotypic resistance tests are collected since the first available from HIV diagnosis. Follow-up for clinical, laboratory, treatment, and virological data accrues from the first evidence of 4-class drug resistance (baseline). Plasma and cell sample collection on an annual basis starts at the date of enrollment in the registry.

**Figure 2.** The 39 Infectious Diseases Clinics participating in the PRESTIGIO Registry, located throughout Italy.

**Figure 3.** Year of evidence of 4-class drug resistance.

1  
2  
3  
4  
5  
6  
7  
8  
9  
10  
11  
12  
13  
14  
15  
16  
17  
18  
19  
20  
21  
22  
23  
24  
25  
26  
27  
28  
29  
30  
31  
32  
33  
34  
35  
36  
37  
38  
39  
40  
41  
42  
43  
44  
45  
46  
47  
48  
49  
50  
51  
52  
53  
54  
55  
56  
57  
58  
59  
60

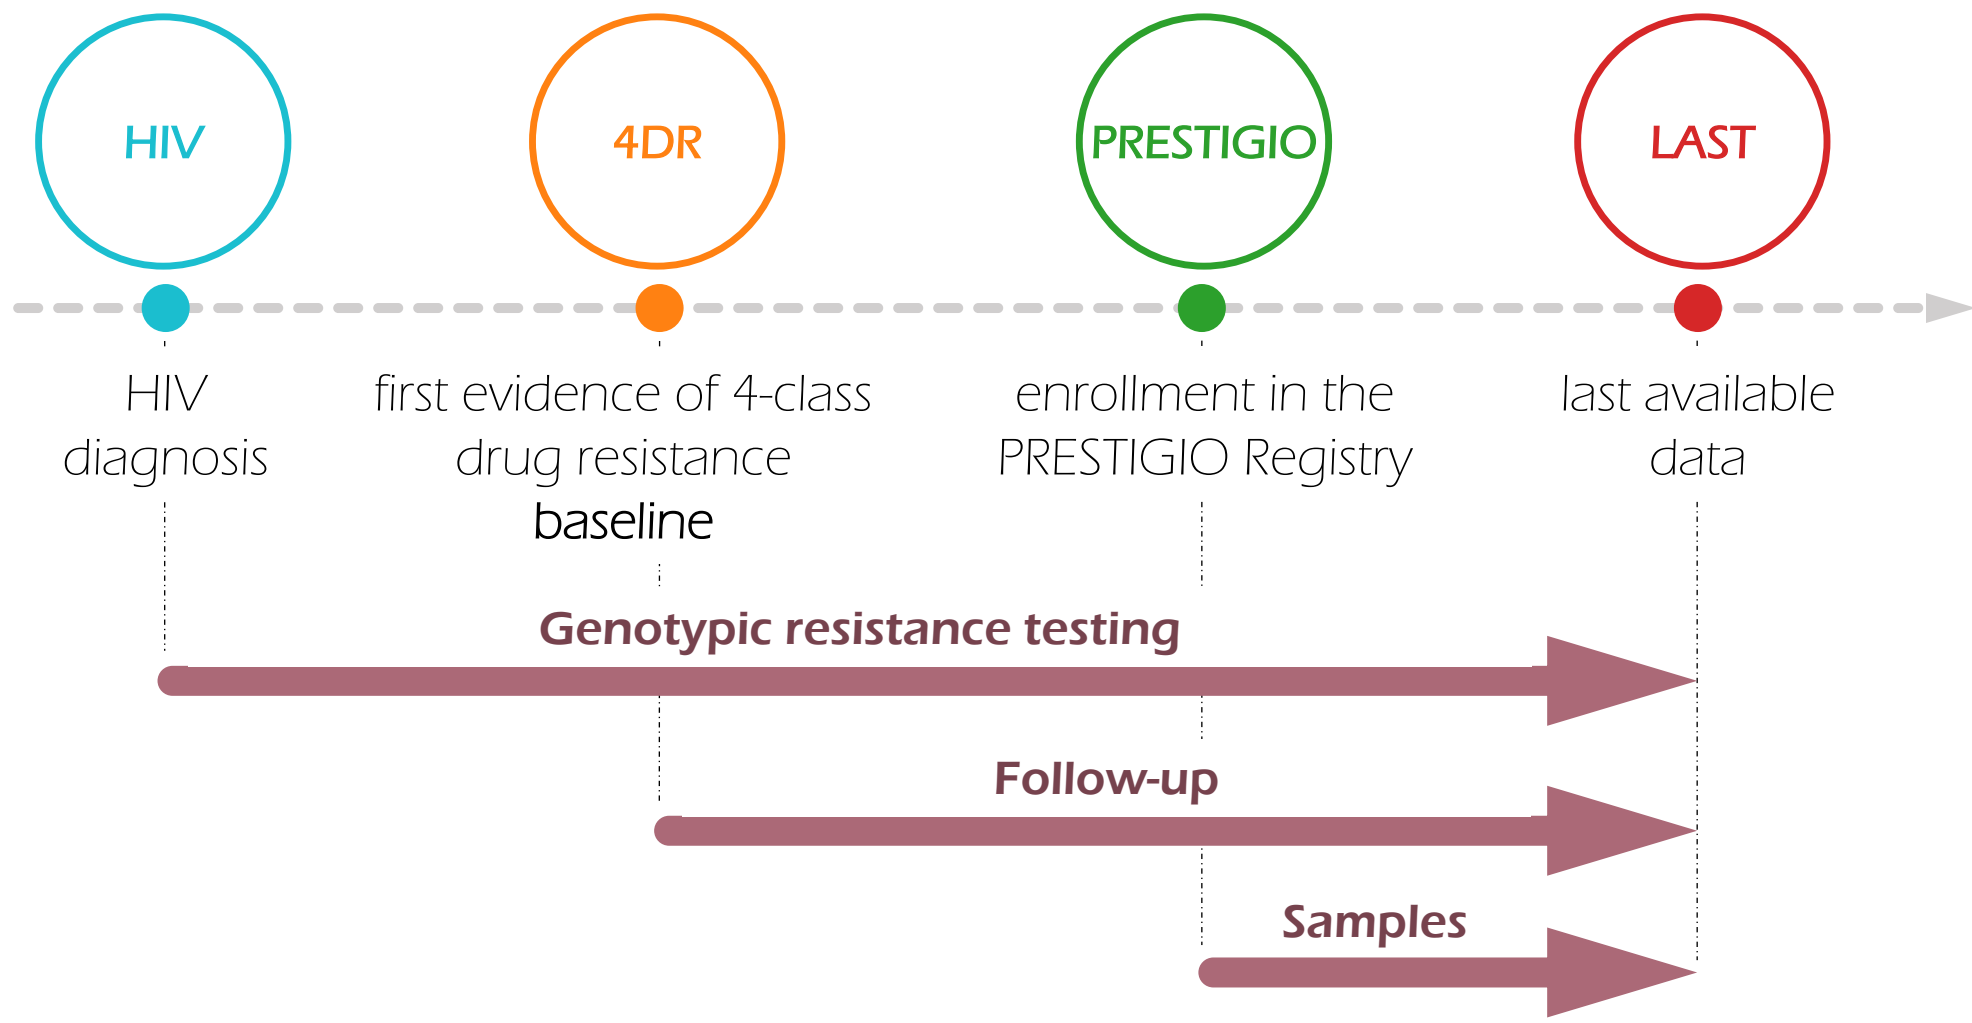

1  
2  
3  
4  
5  
6  
7  
8  
9  
10  
11  
12  
13  
14  
15  
16  
17  
18  
19  
20  
21  
22  
23  
24  
25  
26  
27  
28  
29  
30  
31  
32  
33  
34  
35  
36  
37  
38  
39  
40  
41

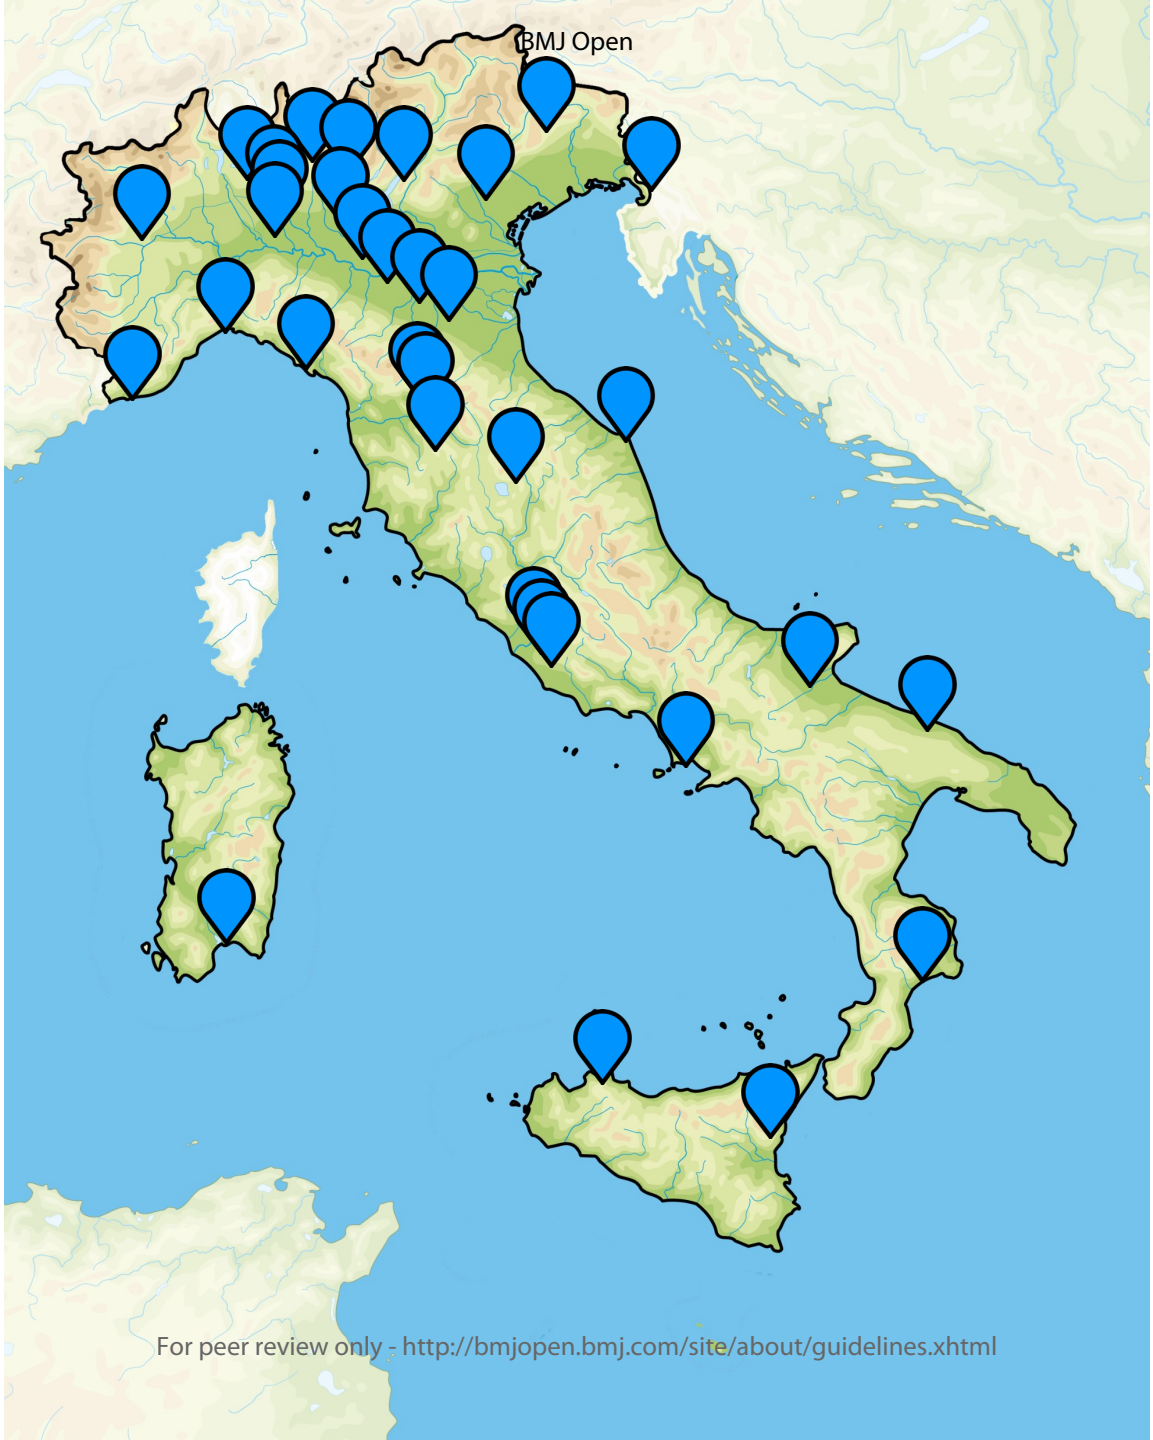

For peer review only - <http://bmjopen.bmj.com/site/about/guidelines.xhtml>

1  
2  
3  
4  
5  
6  
7  
8  
9  
10  
11  
12  
13  
14  
15  
16  
17  
18  
19  
20  
21  
22  
23  
24  
25  
26  
27  
28  
29  
30  
31  
32  
33  
34  
35  
36  
37  
38  
39  
40  
41

1  
2  
3  
4  
5  
6  
7  
8  
9  
10  
11  
12  
13  
14  
15  
16  
17  
18  
19  
20  
21  
22  
23  
24  
25  
26  
27  
28  
29  
30  
31  
32  
33  
34  
35  
36  
37  
38  
39  
40  
41

Number of people living with HIV

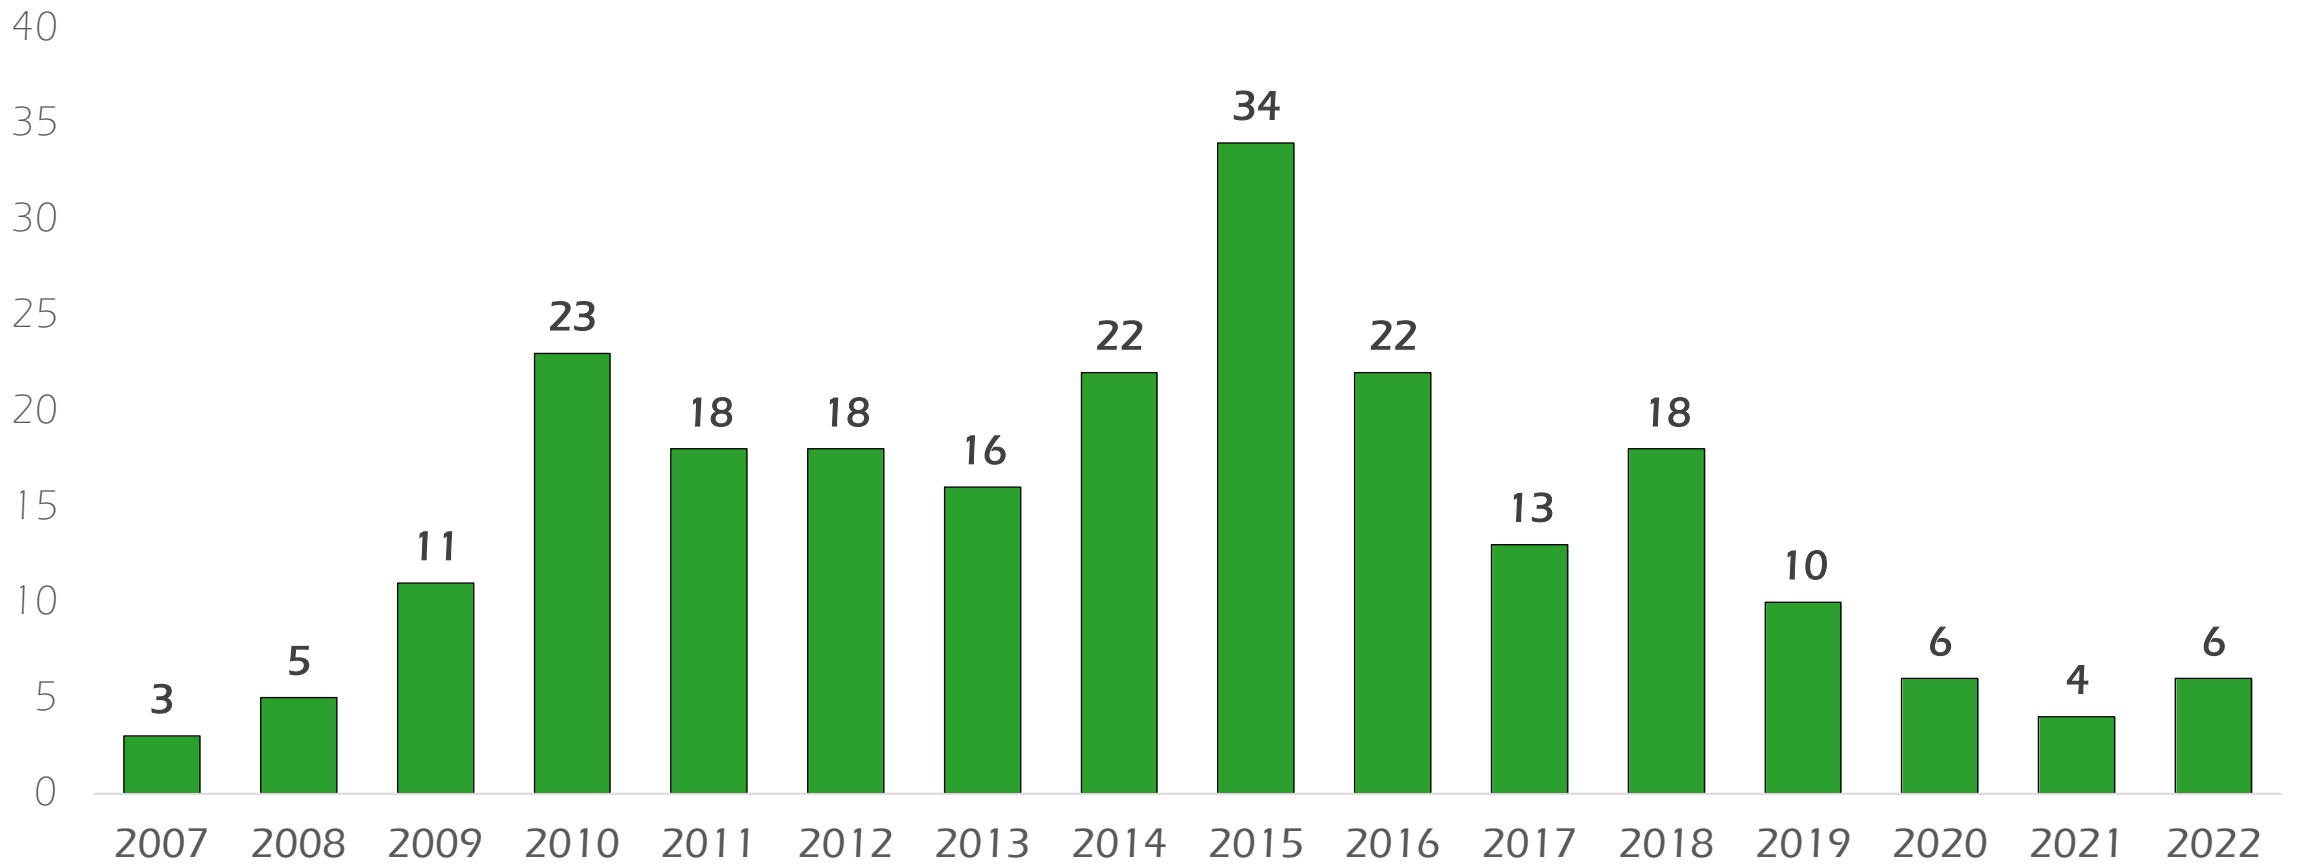

Year of evidence of 4-class drug resistance

**Online supplemental table 1. Summary of variables included in the PRESTIGIO Registry from the date of evidence of 4-class drug resistance.**

|                               |                                                                                                                                                                                                                                                                                                                                                                                                                                                                                                                                               |
|-------------------------------|-----------------------------------------------------------------------------------------------------------------------------------------------------------------------------------------------------------------------------------------------------------------------------------------------------------------------------------------------------------------------------------------------------------------------------------------------------------------------------------------------------------------------------------------------|
| <b>Socio-demographic data</b> |                                                                                                                                                                                                                                                                                                                                                                                                                                                                                                                                               |
| <i>General</i>                | date of birth, sex at birth, country of birth, ethnicity                                                                                                                                                                                                                                                                                                                                                                                                                                                                                      |
| <i>Lifestyle</i>              | height, weight, smoking habit                                                                                                                                                                                                                                                                                                                                                                                                                                                                                                                 |
| <i>HIV-specific</i>           | mode of HIV transmission, date of last negative HIV test, date of first positive HIV test, date of 4-class drug resistance                                                                                                                                                                                                                                                                                                                                                                                                                    |
| <b>Laboratory results</b>     |                                                                                                                                                                                                                                                                                                                                                                                                                                                                                                                                               |
| <i>HIV-specific</i>           | HIV-1 RNA (copies/mL), HIV-1 RNA before ART start (copies/mL)<br>CD4 <sup>+</sup> T-cell count (cells/ $\mu$ L, %), CD8 <sup>+</sup> T-cell count (cells/ $\mu$ L, %),<br>CD4 <sup>+</sup> /CD8 <sup>+</sup> ratio, CD4 <sup>+</sup> nadir (cells/ $\mu$ L)<br>RNA- and DNA-based genotypic resistance testing ( <i>collected since the first test available, also before evidence of 4-class drug resistance</i> )<br>subtype, viral tropism ( <i>collected since the first available, also before evidence of 4-class drug resistance</i> ) |
| <i>Other</i>                  | hepatitis B and C serologies, HBV DNA, HCV RNA<br>complete blood cell count<br>plasma glucose, triglycerides, total/HDL-/LDL-cholesterol, creatinine,<br>transaminases, direct and indirect bilirubin                                                                                                                                                                                                                                                                                                                                         |
| <b>Treatment</b>              |                                                                                                                                                                                                                                                                                                                                                                                                                                                                                                                                               |
| <i>Antiretroviral therapy</i> | date of antiretroviral therapy start, date of highly active antiretroviral therapy (defined as a combination of drugs from at least 2 different classes) start                                                                                                                                                                                                                                                                                                                                                                                |

1  
2  
3  
4  
5  
6  
7  
8  
9  
10  
11  
12  
13  
14  
15  
16  
17  
18  
19  
20  
21  
22  
23  
24  
25  
26  
27  
28  
29  
30  
31  
32  
33  
34  
35  
36  
37  
38  
39  
40  
41  
42  
43  
44  
45  
46  
47  
48  
49  
50  
51  
52  
53  
54  
55  
56  
57  
58  
59  
60

|                                        |                                                                                                                                                                                                                                                                                                                       |
|----------------------------------------|-----------------------------------------------------------------------------------------------------------------------------------------------------------------------------------------------------------------------------------------------------------------------------------------------------------------------|
|                                        | regimens from baseline to the last available visit (including start and stop dates, dose and mode of administration, reason for switch)                                                                                                                                                                               |
| <i>Other medications</i>               | specific drugs (including start and stop dates, dose and mode of administration, reason for stop)                                                                                                                                                                                                                     |
| <i>Vaccines</i>                        | date and type of vaccinations                                                                                                                                                                                                                                                                                         |
| <b>AIDS diagnoses</b>                  | date and type of AIDS events                                                                                                                                                                                                                                                                                          |
| <b>Comorbidities</b>                   | non-AIDS malignancies, diabetes, arterial hypertension requiring treatment, major adverse cardiovascular events, chronic liver or kidney diseases, osteoporosis and related fractures, neurocognitive disorders, chronic obstructive pulmonary disease, etc. (including dates of diagnosis and eventually resolution) |
| <b>Hospitalizations</b>                | dates and reason for hospitalization                                                                                                                                                                                                                                                                                  |
| <b>Pregnancies</b>                     | dates of pregnancy, date of delivery, etc.                                                                                                                                                                                                                                                                            |
| <b>Sexually transmitted infections</b> | date of diagnosis, type, and treatment of sexually transmitted infections                                                                                                                                                                                                                                             |
| <b>Death</b>                           | date and reason of death                                                                                                                                                                                                                                                                                              |



**Online supplemental figure 1.** Resistance-associated mutations present in  $\geq 20\%$  of 4DR-PLWH from the PRESTIGIO Registry. All RNA-based genotypic resistance tests through Sanger sequencing were considered cumulatively. Percentages evaluated on 229 PLWH for NRTI, NNRTI, and PI resistance-associated mutations, on 175 PLWH with at least one available integrase genotype for INSTI resistance-associated mutations. INSTI: integrase strand transfer inhibitor; NNRTI: non-nucleoside reverse transcriptase inhibitor; NRTI: nucleoside reverse transcriptase inhibitor; PI: protease inhibitor; 4DR-PLWH: people living with 4-class drug-resistant HIV.

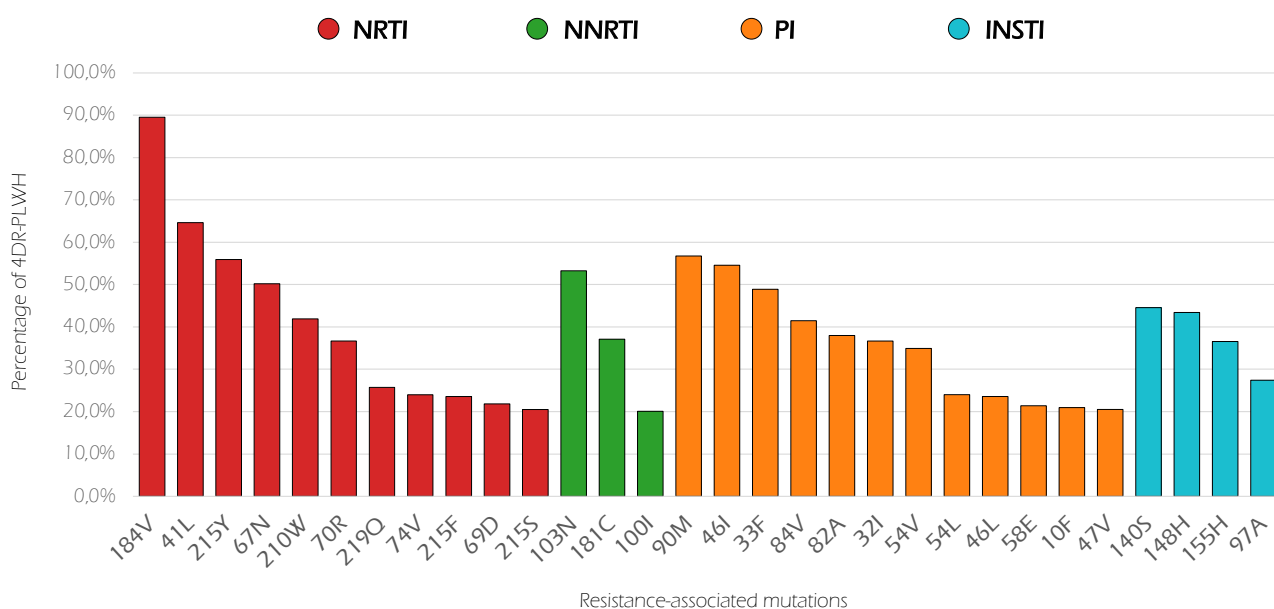

Supplement: bmjopen-2023-080606.draft_revisions.pdf [file bmjopen-2023-080606.draft_revisions.pdf]
