# Supplementary material for: Cohort profile: PRESTIGIO, an Italian prospective registry-based cohort of people with HIV-1 resistant to reverse transcriptase, protease and integrase inhibitors
Source: PubMed Central journal article supplement — BMJ Open. 2024 Feb 10;14(2):e080606. doi: 10.1136/bmjopen-2023-080606 (PMC10862296; doi:10.1136/bmjopen-2023-080606), 2024-02-10
Supplement: bmjopen-2023-080606supp002.pdf [file bmjopen-2023-080606supp002.pdf]

## Acknowledgements

**PRESTIGIO Study Group - STEERING COMMITTEE:** Antonella Castagna (Coordinator; Principal Investigator), Vincenzo Spagnuolo and Laura Galli (Infectious Diseases, IRCCS San Raffaele Scientific Institute, Milan, Italy), Franco Maggiolo (Unit of HIV-related Diseases and Experimental Therapies, Azienda Ospedaliera Papa Giovanni XXIII, Bergamo, Italy), Leonardo Calza (Unit of Infectious Diseases, Department of Medical and Surgical Sciences, S. Orsola Hospital, “Alma Mater Studiorum” University of Bologna, Bologna, Italy), Emanuele Focà (Unit of Infectious and Tropical Diseases, Department of Clinical and Experimental Sciences, ASST Spedali di Brescia, University of Brescia, Brescia, Italy), Filippo Lagi (Infectious and Tropical Diseases Unit, Careggi University Hospital, Florence, Italy), Giovanni Cenderello (Department of Infectious Diseases, Sanremo Hospital, Sanremo, Italy), Antonio Di Biagio (Clinic of Infectious Diseases, IRCCS Policlinico San Martino Hospital, University of Genoa, Genoa, Italy), Giulia Marchetti (Clinic of Infectious Diseases, San Paolo Hospital, ASST Santi Paolo e Carlo, Department of Health Sciences, University of Milan, Italy), Stefano Rusconi (DIBIC, University of Milan, Italy), Adriana Cervo (Infectious Diseases Unit, Policlinico di Modena, Università Degli Studi di Modena e Reggio Emilia, Modena, Italy), Roberta Gagliardini (National Institute for Infectious Diseases “L. Spallanzani” IRCCS, Rome, Italy), Stefano Bonora (Unit of Infectious Diseases, Department of Medical Sciences, University of Turin, Turin, Italy), Anna Maria Cattelan (Infectious Diseases Unit, Department of Molecular Medicine, Padua University Hospital, Padua, Italy), Maurizio Zazzi (Department of Medical Biotechnologies, University of Siena, Siena, Italy), Maria Mercedes Santoro (Department of Experimental Medicine, University of Rome “Tor Vergata”, Rome, Italy). **VIROLOGY TEAM AND BIOLOGICAL BANK:** Maurizio Zazzi (Department of Medical Biotechnologies, University of Siena, Siena, Italy), Maria Mercedes Santoro (Department of Experimental Medicine, University of Rome “Tor Vergata”, Rome, Italy), Andrea Galli (Infectious Diseases, IRCCS San Raffaele Scientific Institute, Milan, Italy), Francesco Saladini (Department of Medical Biotechnologies, University of Siena, Siena, Italy), Daniele Armenia (Saint Camillus International

University of Health Sciences, Rome, Italy). **STUDY COORDINATORS:** Elisabetta Carini and Sabrina Bagaglio (Infectious Diseases, IRCCS San Raffaele Scientific Institute, Milan, Italy). **STATISTICAL AND MONITORING TEAM:** Laura Galli, Riccardo Lolatto and Sara Diotallevi (Infectious Diseases, IRCCS San Raffaele Scientific Institute, Milan, Italy). **PARTICIPATING CENTERS:** ANCONA (Gastroenterological and Transplant Department, S.O.D. Malattie Infettive Emergenti e degli Immunodepressi, University Hospital "Ospedali Riuniti", Ancona, Italy): Marcello Tavio and Alessandra Mataloni Paggi; AVIANO (Centro di riferimento oncologico, Aviano, Italy): Ferdinando Martellotta; BAGNO A RIPOLI (Infectious Diseases Unit, Santa Maria Annunziata Hospital, Bagno a Ripoli, Italy): Francesca Vichi, Alessio Bellucci, Elisa Mirabelli; BARI (Operative Unit of Infectious Diseases, Hospital-University Polyclinic of Bari, Bari, Italy): Annalisa Saracino and Flavia Balena; BERGAMO (Unit of HIV-related Diseases and Experimental Therapies, Azienda Ospedaliera Papa Giovanni XXIII, Bergamo, Italy): Franco Maggiolo, Laura Comi, Daniela Valenti, and Claudia Suardi; BOLOGNA (Unit of Infectious Diseases, Department of Medical and Surgical Sciences, S. Orsola Hospital, "Alma Mater Studiorum" University of Bologna, Bologna, Italy): Leonardo Calza and Federica Malerba; BRESCIA (Unit of Infectious and Tropical Diseases, Department of Clinical and Experimental Sciences, ASST Spedali di Brescia, University of Brescia, Brescia, Italy): Francesco Castelli, Emanuele Focà, Davide Minisci, Francesca Pennati, Anna Celotti, and Francesca Brognoli; BUSTO ARSIZIO (Unit of Infectious Diseases, ASST della Valle Olona, Busto Arsizio Hospital, Busto Arsizio, Italy): Barbara Menzaghi and Maddalena Farinazzo; CAGLIARI (Immunology Unit, Department of Internal Medicine, University Hospital of Cagliari, Cagliari, Italy): Francesco Ortu; (Infectious Diseases Unit, SS Trinità Hospital, ASSL Cagliari, Italy): Marco Campus; CATANIA (Unit of Infectious Diseases, Garibaldi Hospital, Catania, Italy): Bruno Cacopardo, Benedetto Maurizio Celesia, Michele Salvatore Paternò Raddusa, and Carmen Giarratana; CATANZARO (Infectious and Tropical Disease Unit, Department of Medical and Surgical Sciences, "Magna Graecia" University of Catanzaro, Catanzaro, Italy): Carlo Torti, Paolo Fusco, and Gabriele Bruno; CREMONA (Unità di Malattie Infettive, ASST di Cremona, Cremona, Italy): Angelo Pan,

Paola Brambilla, and Chiara Fornabaio; FIRENZE (Infectious and Tropical Diseases Unit, Careggi University Hospital, Florence, Italy): Alessandro Bartoloni, Paola Corsi, Seble Tekle Kiros, Filippo Lagi, and Filippo Ducci; FOGGIA (Clinic of Infectious Diseases, Department of Clinical and Experimental Medicine, University of Foggia, Foggia, Italy): Teresa Santantonio, Sergio Lo Caputo, Sergio Ferrara, and Marianna Narducci; GENOVA (Infectious Disease Unit, Galliera Hospital, Genoa, Italy): Emanuele Pontali, Marcello Feasi, and Antonio Sarà; (Clinic of Infectious Diseases, IRCCS Policlinico San Martino Hospital, University of Genoa, Genoa, Italy): Matteo Bassetti, Antonio Di Biagio, and Sabrina Bianchi; LA SPEZIA (Infectious Diseases and Hepatology Unit, Sant'Andrea Hospital La Spezia, La Spezia, Italy): Stefania Artioli and Michele Guerra; MILANO (Infectious Diseases, IRCCS San Raffaele Scientific Institute, Milan, Italy): Antonella Castagna, Vincenzo Spagnuolo, Elisabetta Carini, Sabrina Bagaglio, Laura Galli, Riccardo Lolatto, Andrea Galli, Tommaso Clemente, Rebecka Papaioannu Borjesson, and Sara Diotallevi; (III Division of Infectious Diseases, ASST Fatebenefratelli Sacco, Luigi Sacco Hospital, Milano, Italy): Spinello Antinori, Tiziana Formenti, and Andrea Giacomelli; (Clinic of Infectious Diseases, San Paolo Hospital, ASST Santi Paolo e Carlo, Department of Health Sciences, University of Milan, Italy): Giulia Marchetti, Lidia Gazzola, and Federica De Flaviis; (Division of Infectious Diseases, ASST Grande Ospedale Metropolitano Niguarda, Milano, Italy): Massimo Puoti, Cristina Moioli, and Federico D'Amico; (Infectious Diseases Unit, Department of Internal Medicine, Fondazione IRCCS Ca' Granda Ospedale Maggiore Policlinico, Milan, Italy): Alessandra Bandera and Valentina Ferroni; MODENA (Infectious Diseases Unit, Policlinico di Modena, Università Degli Studi di Modena e Reggio Emilia, Modena, Italy): Cristina Mussini, Adriana Cervo, Roncaglia Enrica, Nardini Giulia, and Barbara Beghetto; NAPOLI (VIII Infectious Disease Unit, AORN dei Coli, PO Cotugno, Naples, Italy): Elio Manzillo and Amedeo Lanzardo; PADOVA (Infectious Diseases Unit, Department of Molecular Medicine, Padua University Hospital, Padua, Italy): Anna Maria Cattelan and Maria Mazzitelli; PALERMO (Infectious and Tropical Disease Unit, Sicilian Regional Reference Center for the Fight against AIDS, AOU Policlinico "P. Giaccone", Palermo, Italy): Antonio

Cascio and Marcello Trizzino; PARMA (Unit of Infectious Diseases, AO-Universitaria, Parma, Italy): Elisa Fronti and Diletta Laccabue; PAVIA (Division of Infectious Diseases, Fondazione IRCCS Policlinico San Matteo, Pavia, Italy): Roberto Gulminetti and Andrea Zuccarini; PERUGIA (Infectious Diseases Clinic, University Hospital "S. Maria della Misericordia", University of Perugia, Perugia, Italy): Daniela Francisci, Elisabetta Schiaroli, and Giuseppe De Socio; REGGIO EMILIA (Malattie Infettive Arcispedale S. Maria Nuova-IRCSS, Reggio Emilia, Italy): Elisa Garlassi and Romina Corsini; ROMA (National Institute for Infectious Diseases "L. Spallanzani" IRCCS, Rome, Italy): Roberta Gagliardini, Marisa Fusto and Andrea Antinori; (Infectious Disease Clinic, Tor Vergata University Hospital PTV, Rome, Italy): Loredana Sarmati, Vincenzo Malagnino; (UOC Malattie Infettive, Infectious Disease Department, Fondazione Policlinico Universitario Agostino Gemelli IRCCS, Rome, Italy): Silvia Lamonica, Simona Di Giambenedetto, and Tiziana Mulas; SANREMO (Department of Infectious Diseases, Sanremo Hospital, Sanremo, Italy): Giovanni Cenderello and Rachele Pincino; SIENA (Department of Medical Sciences, Infectious and Tropical Diseases Unit, University Hospital of Siena, Siena, Italy): Mario Tumbarello, Massimiliano Fabbiani, Francesca Panza, and Ilaria Rancan; TORINO (Unit of Infectious Diseases, Department of Medical Sciences, University of Turin, Turin, Italy): Giovanni Di Perri, Stefano Bonora, Micol Ferrara, and Silvia Fantino; TRIESTE (Infectious Diseases Unit, Trieste University Hospital ASUGI, Trieste, Italy): Roberto Luzzati and Andrea Misin; VERONA (UOS Malattie Infettive dell'Azienda Scaligera di Verona, Verona, Italy): Marina Malena and Marta Fiscon.
